# Supplementary material for: Identification of palmitoylation-related lncRNAs as prognostic biomarkers and immune modulators in liver cancer
Source: Research Square preprint supplement (doi:10.21203/rs.3.rs-6942496/v1), 2025-07-31

| **Gene** | **Primer** | **Sequence (5'-3')** |
| --- | --- | --- |
| ZDHHC18-homo | Forward | ACCGGCCTCTTCTTCGTCT |
| Reverse | AACTGCCTGTGTTGTCGATCT |
| ZDHHC9-homo | Forward | CCTGGGTGGGGAATTGTGTT |
| Reverse | ACGACGGACCAGAGTGTAAAG |
| ZDHHC8-homo | Forward | CTGTTCCCGTCTACAATGGCA |
| Reverse | GACCTGGATACCTCGCACAT |
| ZDHHC5-homo | Forward | CACCTGCCGCTTTTACCGT |
| Reverse | CGGCGACCAATACAGTTATTCAC |
| ZDHHC20-homo | Forward | CGCACCCACGTTTTCATACG |
| Reverse | TCTGGCATACTCATTCTGGTTTG |
| ZDHHC12-homo | Forward | GTGCTGACCTGGGGAATCAC |
| Reverse | CTGCACATTCACGTAGCCA |
| ZDHHC11-homo | Forward | AGTGAACGGCTGGTCGTTAC |
| Reverse | CCACGTAGGCAATGTATTTCCA |
| ZDHHC4-homo | Forward | TGATGGGTCTTGTTCTTATCTGC |
| Reverse | AGGTGTGGTTTCTCGTATGGAA |
| ZDHHC24-homo | Forward | CTGGCACAGTTTGCCTTGG |
| Reverse | CAGGGACCCAGGTCATAGGAG |
| ZDHHC16-homo | Forward | ACTCCGGGGTCTAGTACAGC |
| Reverse | CCAGCGGATCACGTTGTCT |
| ZDHHC7-homo | Forward | CTGACCGGGTCTGGTTCATC |
| Reverse | CATGACGAAAGTCACCACGAA |
| ZDHHC3-homo | Forward | CCACTTCCGAAACATTGAGCG |
| Reverse | CCACAGCCGTCACGGATAAA |
| ZDHHC22-homo | Forward | GGGGCGCTCTTCCTATTCC |
| Reverse | GCAGAAGTGGGTGCTAGGTG |
| ZDHHC13-homo | Forward | ACCCCACTCTTATTGATGGAGA |
| Reverse | TGTCTGCCCATTTACATCTGTC |
| ZDHHC6-homo | Forward | ATGGGTACGTTCTGTTCGGTT |
| Reverse | AAGGGCCAATACCACAACACA |
| ZDHHC2-homo | Forward | GTCTGGAGCCATCCGATACTG |
| Reverse | AATCTGTTGCCGCAATAAAAAGG |
| ZDHHC15-homo | Forward | ATTGTCCTCGTCGTGCTCTG |
| Reverse | ACTTCTGGTTTGGCTGCTGT |
| ZDHHC19-homo | Forward | TTGCTGCCTTCAATGTGGTG |
| Reverse | CGGAGCCTTGATGTAAGATGC |
| ZDHHC1-homo | Forward | CAAGCCCTCCAACAAGACG |
| Reverse | CCAAAGCCGATCACAGCAAAG |
| ZDHHC23-homo | Forward | TCTGGATGAAGGGTGTGATCG |
| Reverse | GCTCCCCTAAGCCAAGGAA |
| ZDHHC17-homo | Forward | GGCCCGGATGAGTACGATAC |
| Reverse | TCCAAGAGGTTCACCATATCCA |
| ZDHHC14-homo | Forward | TGTGATAACTGCGTAGAACGGT |
| Reverse | CGTGGGTGATAACGAATGCAA |
| ZDHHC21-homo | Forward | TGTTGTTGACCCACATGGTTG |
| Reverse | GAGGCCCTCACTAAGGCAA |
| LYPLA1-homo | Forward | CCTTTGCAGGTATCAGAAGTTCA |
| Reverse | GCTGCCTGTTTAATCCCAGAT |
| LYPLA2-homo | Forward | AGGCAGCTAATGGCAGTGC |
| Reverse | AGGTGTGACAACAGACCGGA |
| ABHD17C-homo | Forward | ACTGTCCCCACGGTAGACTT |
| Reverse | TGTCAATGCTGGGGAAAGCA |
| ABHD17A-homo | Forward | GAGGCTCACTTCCGTCCG |
| Reverse | GCAACCACAGGTCTCCATGT |
| ABHD17B-homo | Forward | TGCTTGGCTTGCTCTTAG |
| Reverse | CAGTAGGTCTTCTTGGTATCA |
| PPT2-hom | Forward | CCTCAAGGGGTGCATCTCATC |
| Reverse | TCAAGTAGTCCGTGTCTCCAT |
| PPT1-homo | Forward | TGTTTTTGGACTCCCTCGATG |
| Reverse | CATGCCAGTATTCGGCTTGC |
| AL031985.3- human | Forward | GTTTCGTTTGGCTCAAGGGC |
| Reverse | GGCTCCAAGACAGCATTACA |
| NRAV-human | Forward | GGAGTTGATGCCTCCGAACA |
| Reverse | ATGACCGGAGCTGAAAGGTG |

**Supplementary Table 1.** The primer pairs utilized in Real-Time Quantitative PCR.

**Supplementary Figure 1 includes a total of 24 images. To maintain image quality, individual images are supplied separately.**


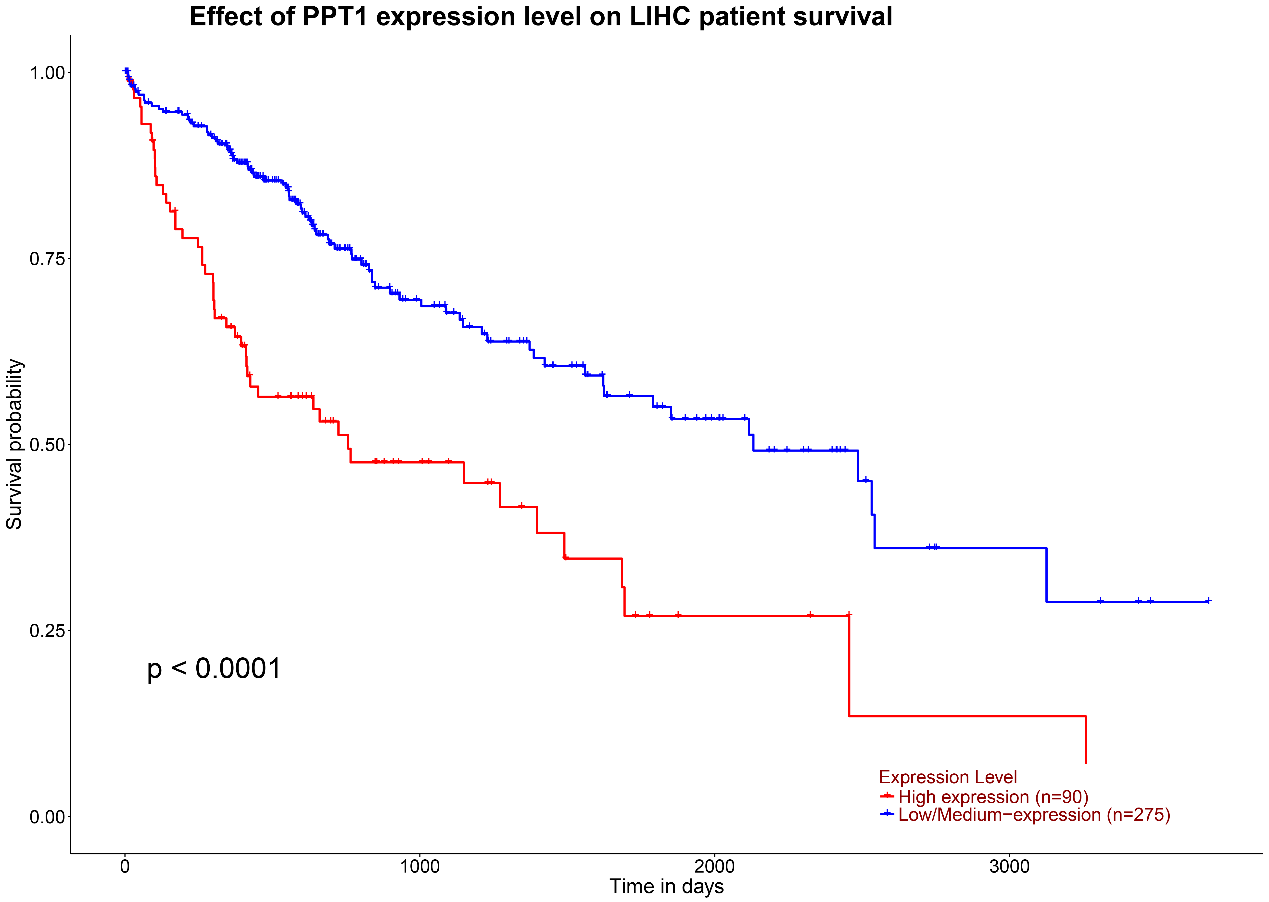


**Effect of PPT1 expression level on LIHC patient survival**


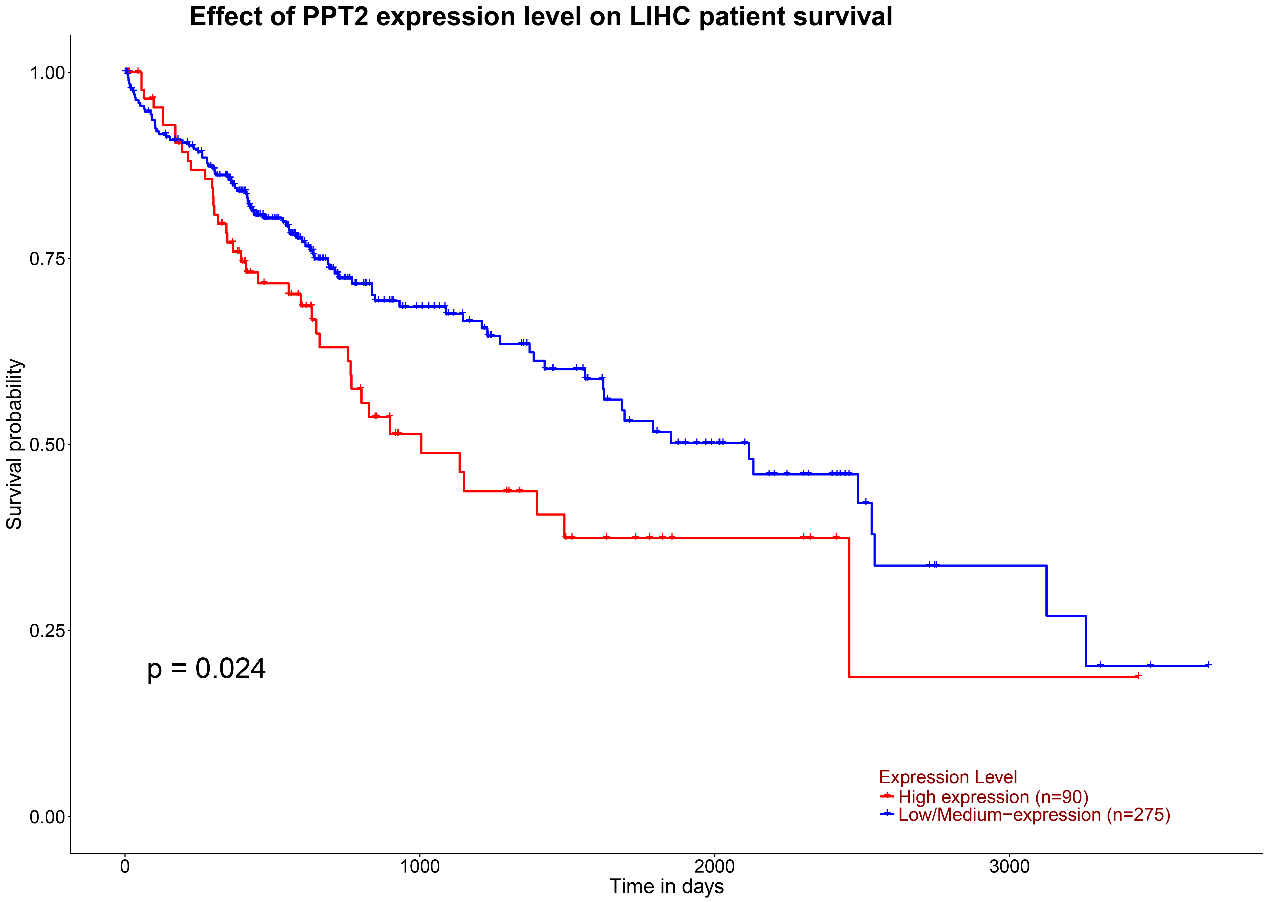


**Effect of PPT2 expression level on LIHC patient survival**


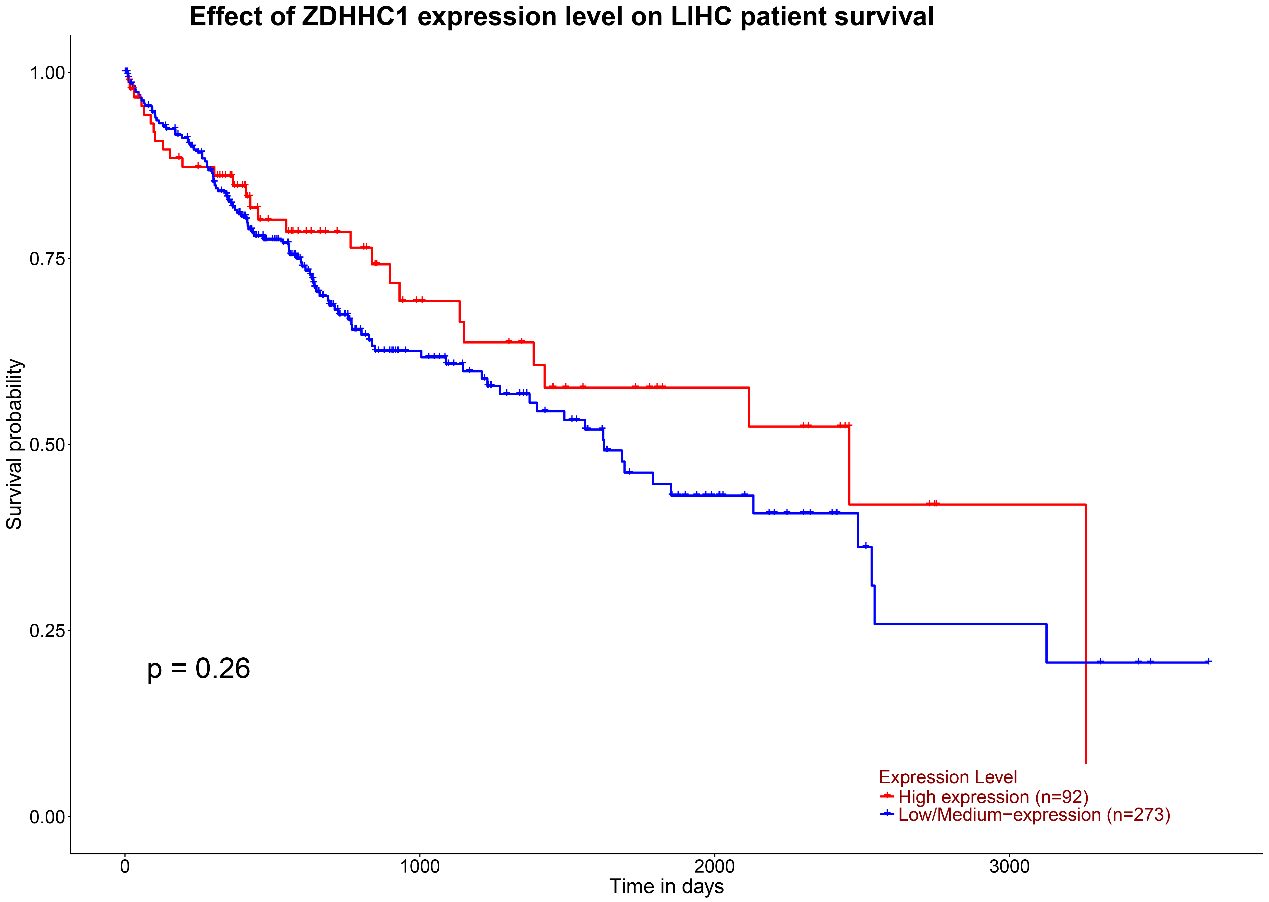


**Effect of ZDHHC1 expression level on LIHC patient survival**


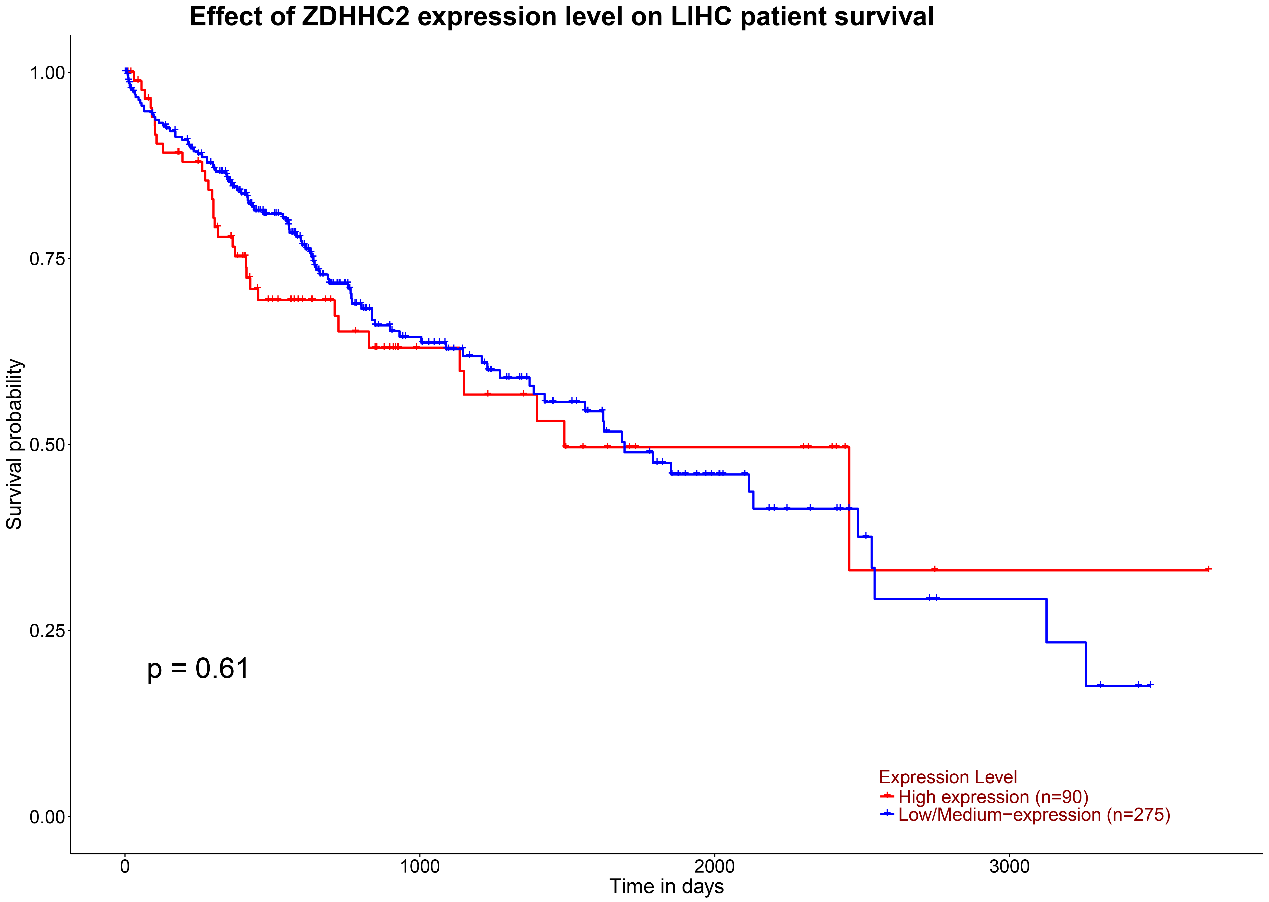


**Effect of ZDHHC2 expression level on LIHC patient survival**

**
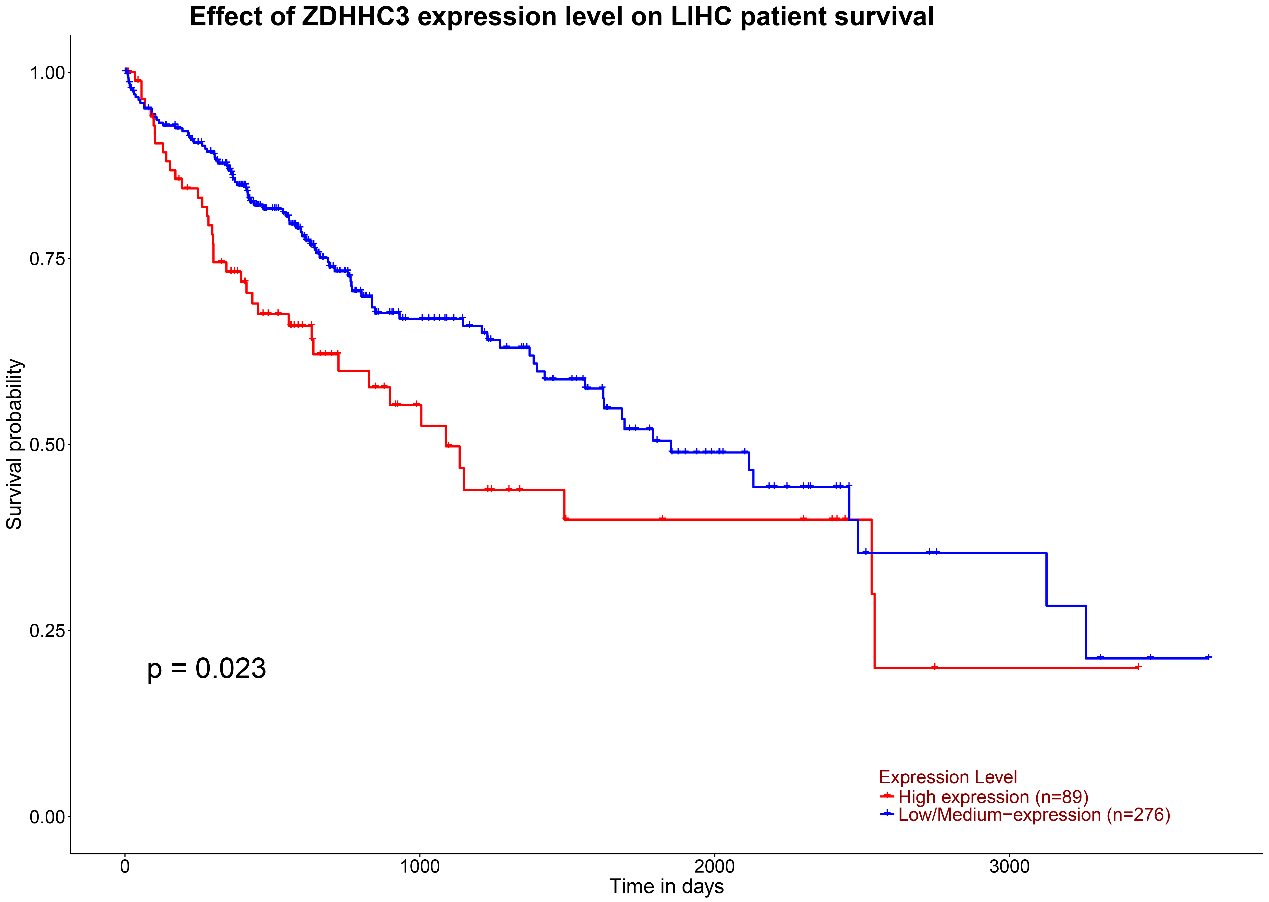
**

**Effect of ZDHHC3 expression level on LIHC patient survival**


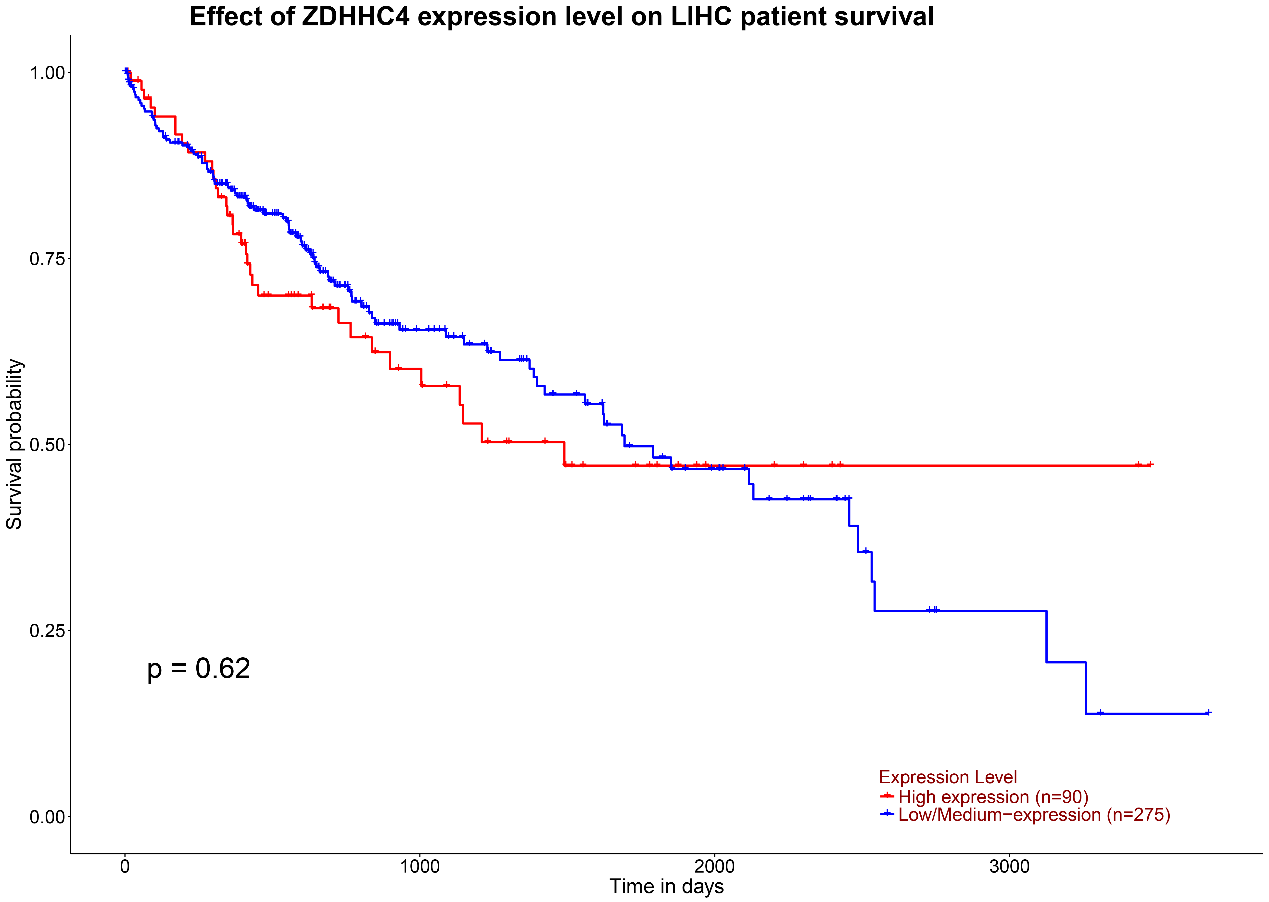


**Effect of ZDHHC4 expression level on LIHC patient survival**

**
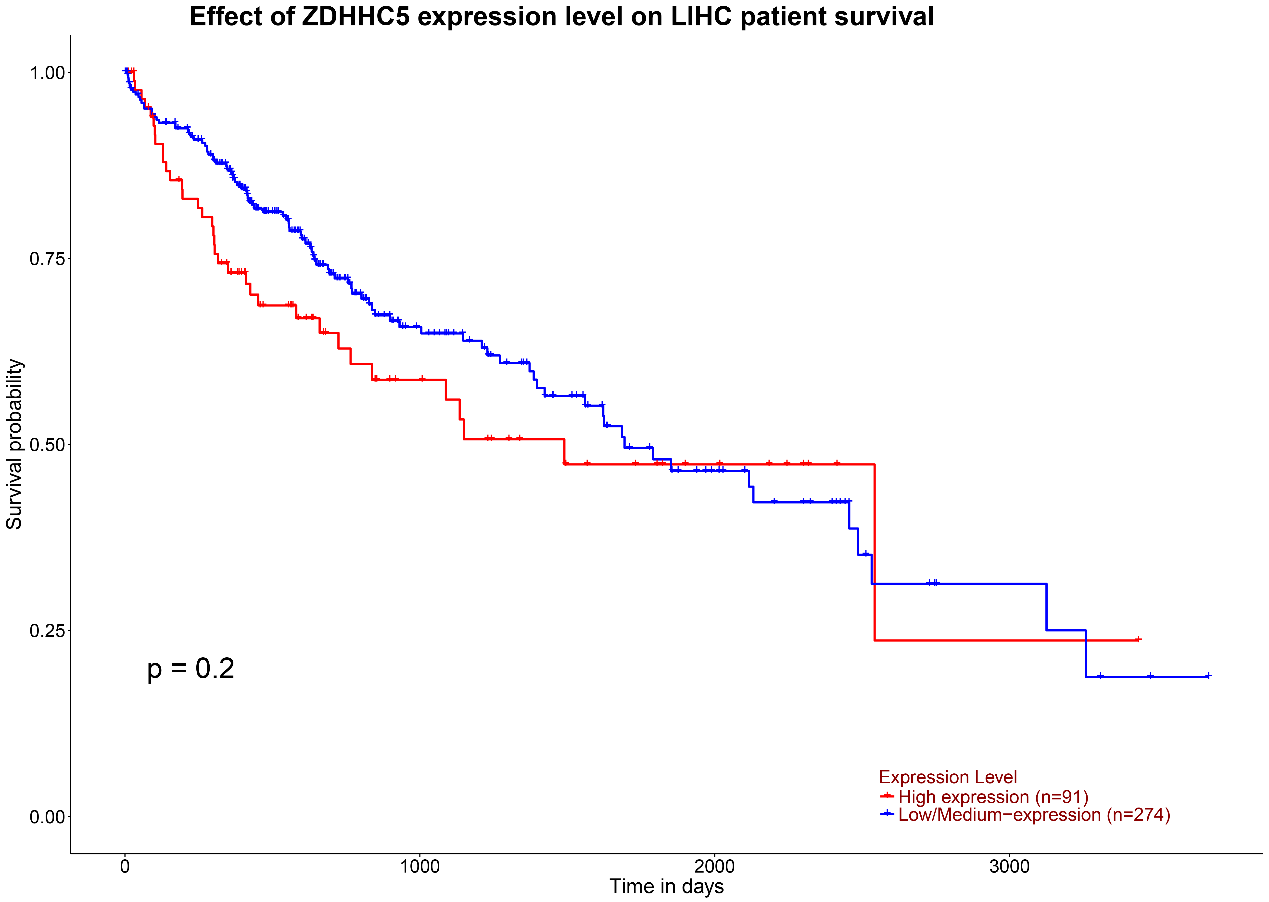
**

**Effect of ZDHHC5 expression level on LIHC patient survival**


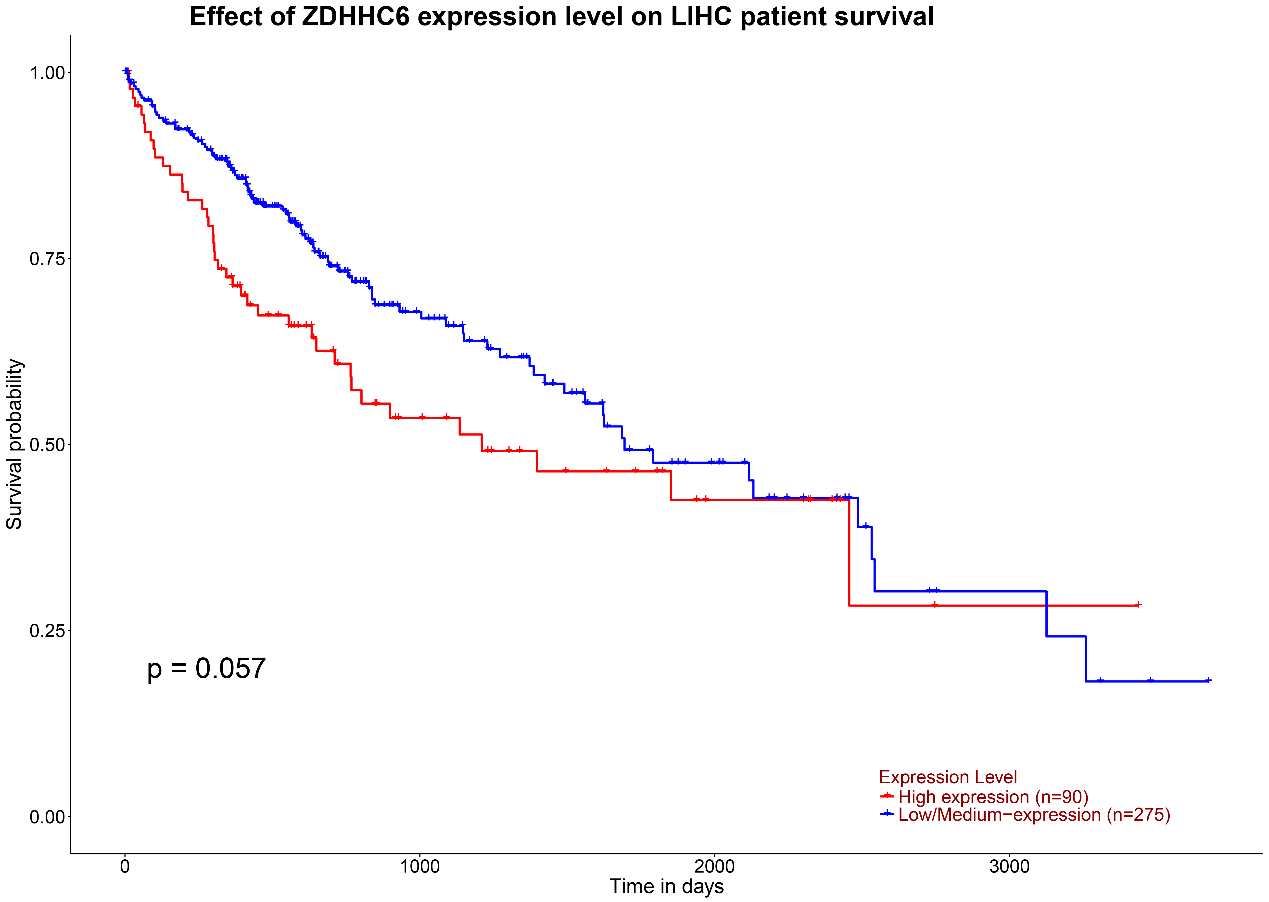
 **Effect of ZDHHC6 expression level on LIHC patient survival**


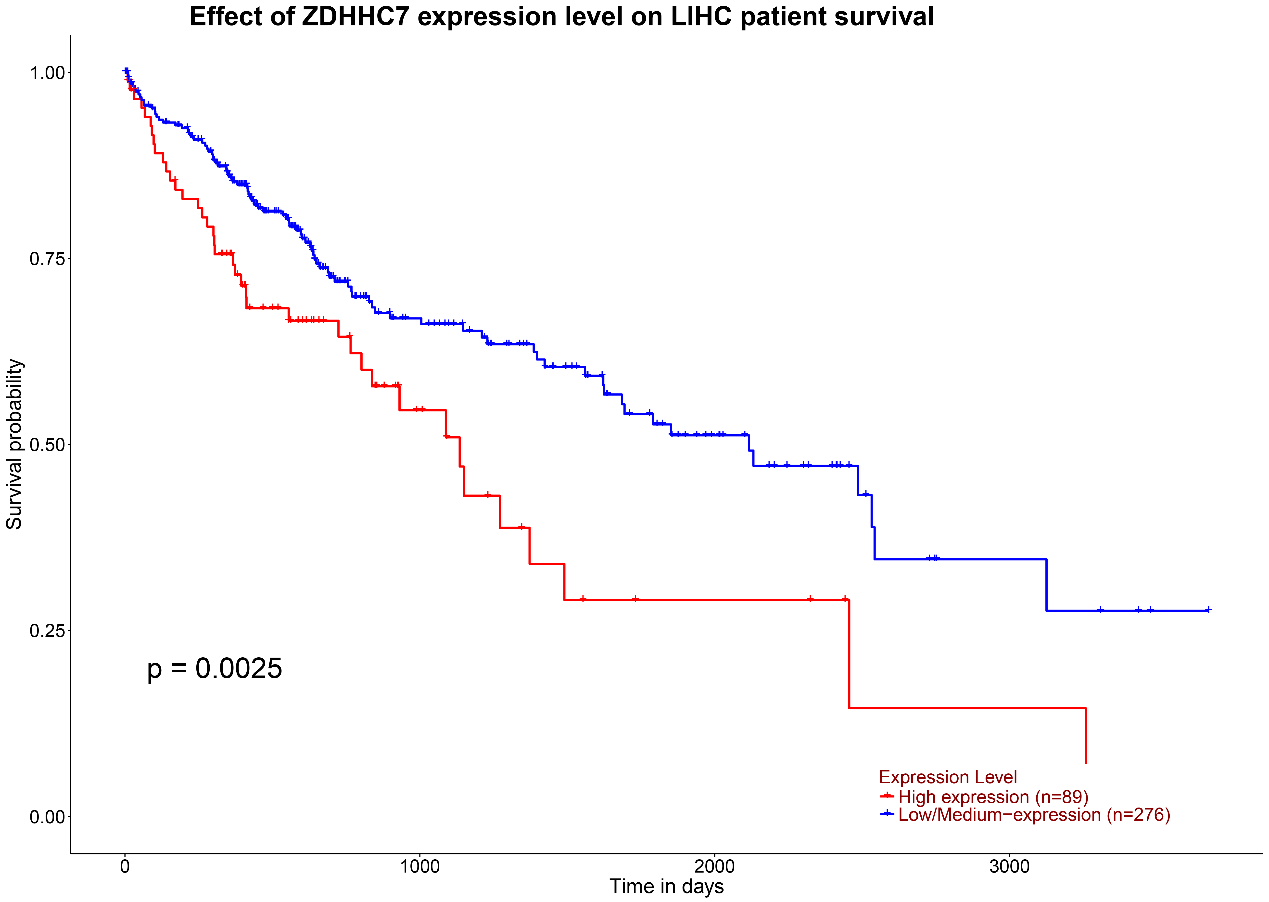
 **Effect of ZDHHC7 expression level on LIHC patient survival**


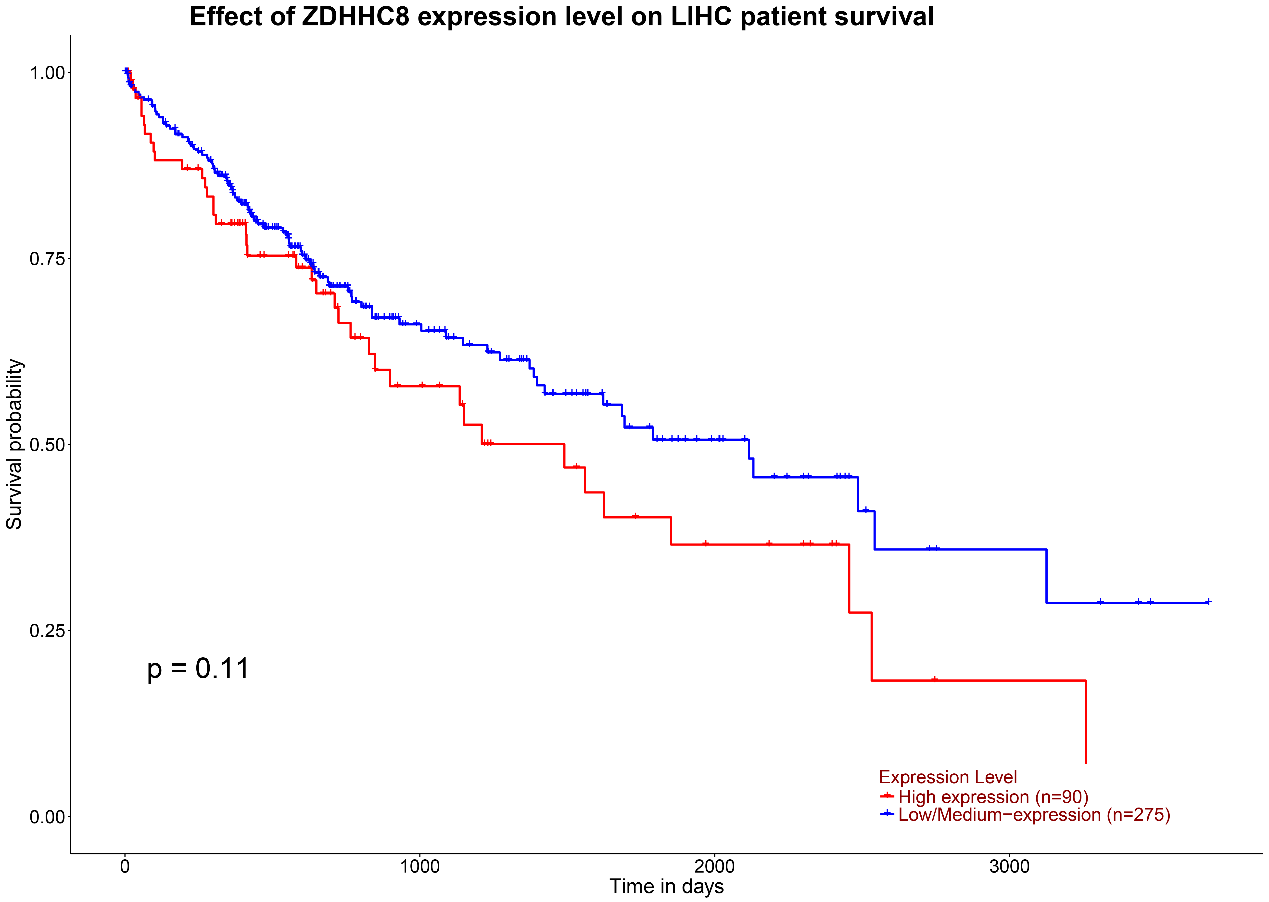
 **Effect of ZDHHC8 expression level on LIHC patient survival**


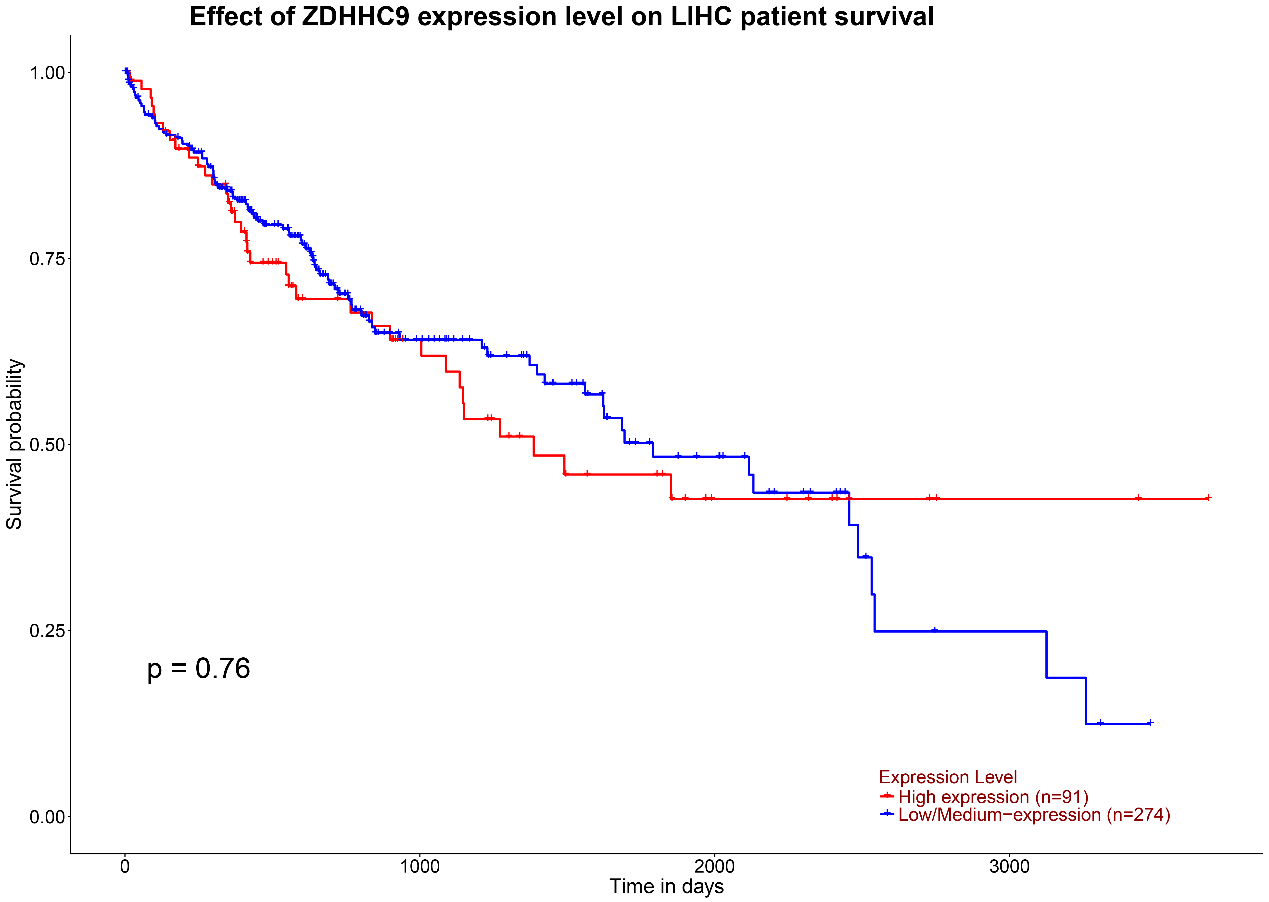
**Effect of ZDHHC9 expression level on LIHC patient survival**


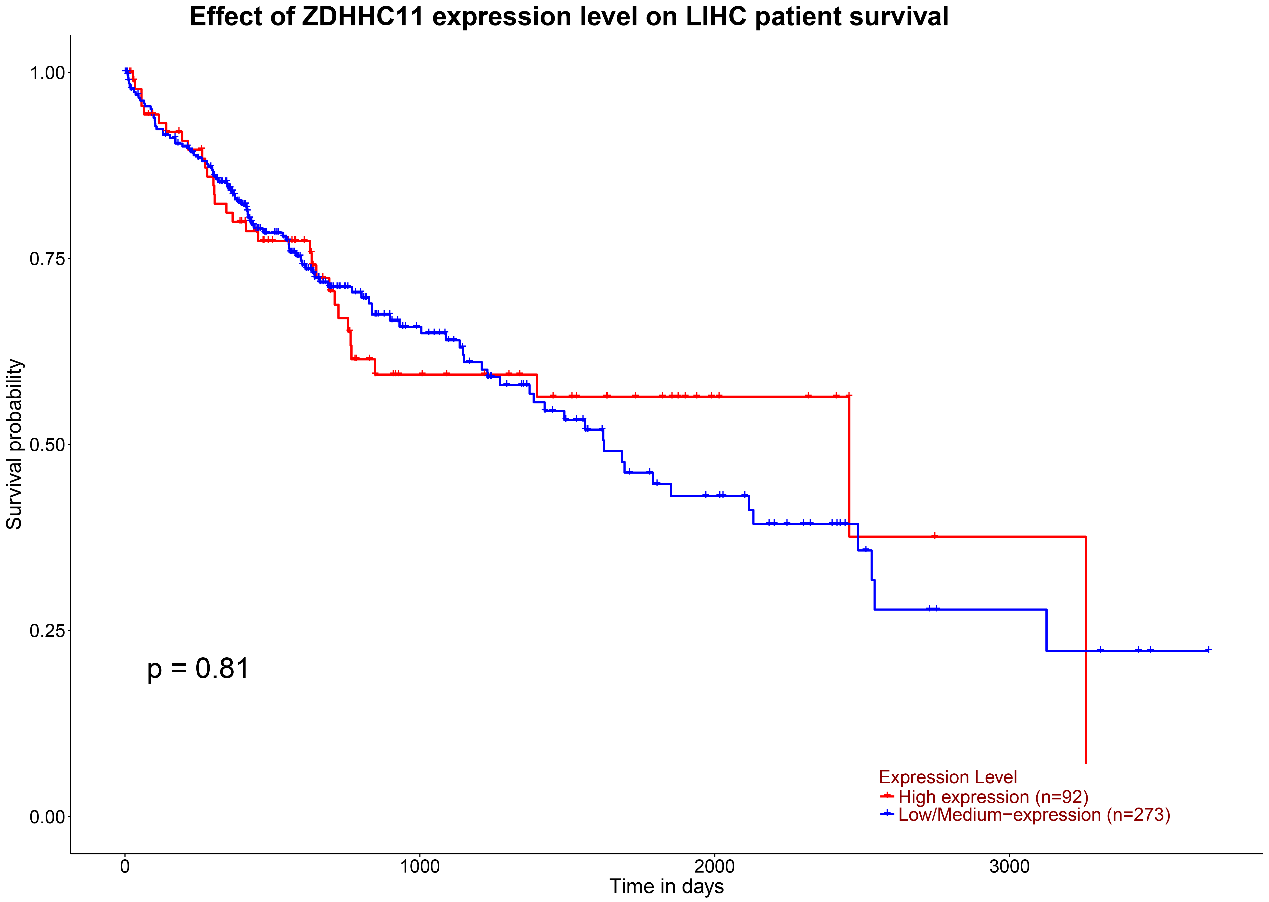
 **Effect of ZDHHC11 expression level on LIHC patient survival**


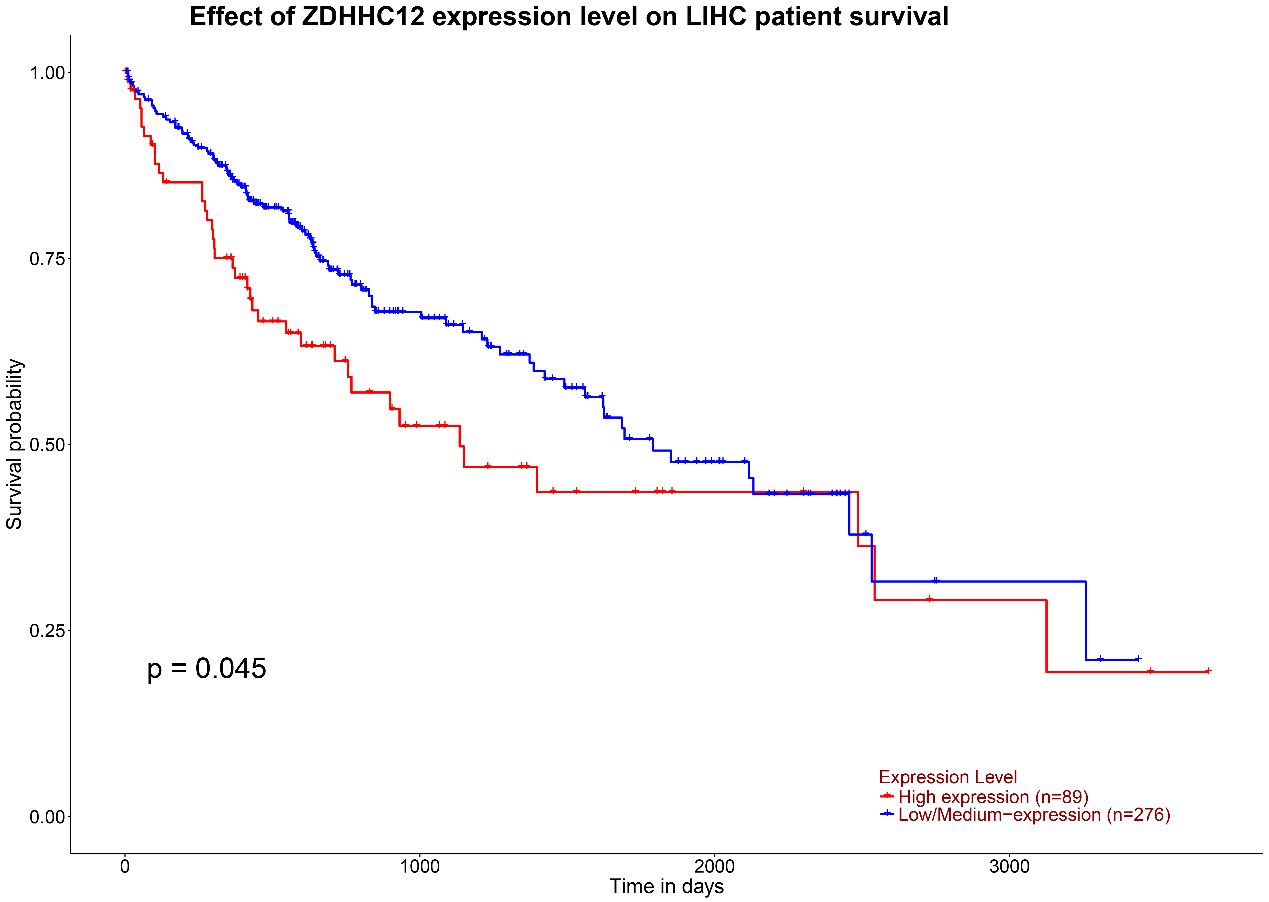
 **Effect of ZDHHC12 expression level on LIHC patient survival**


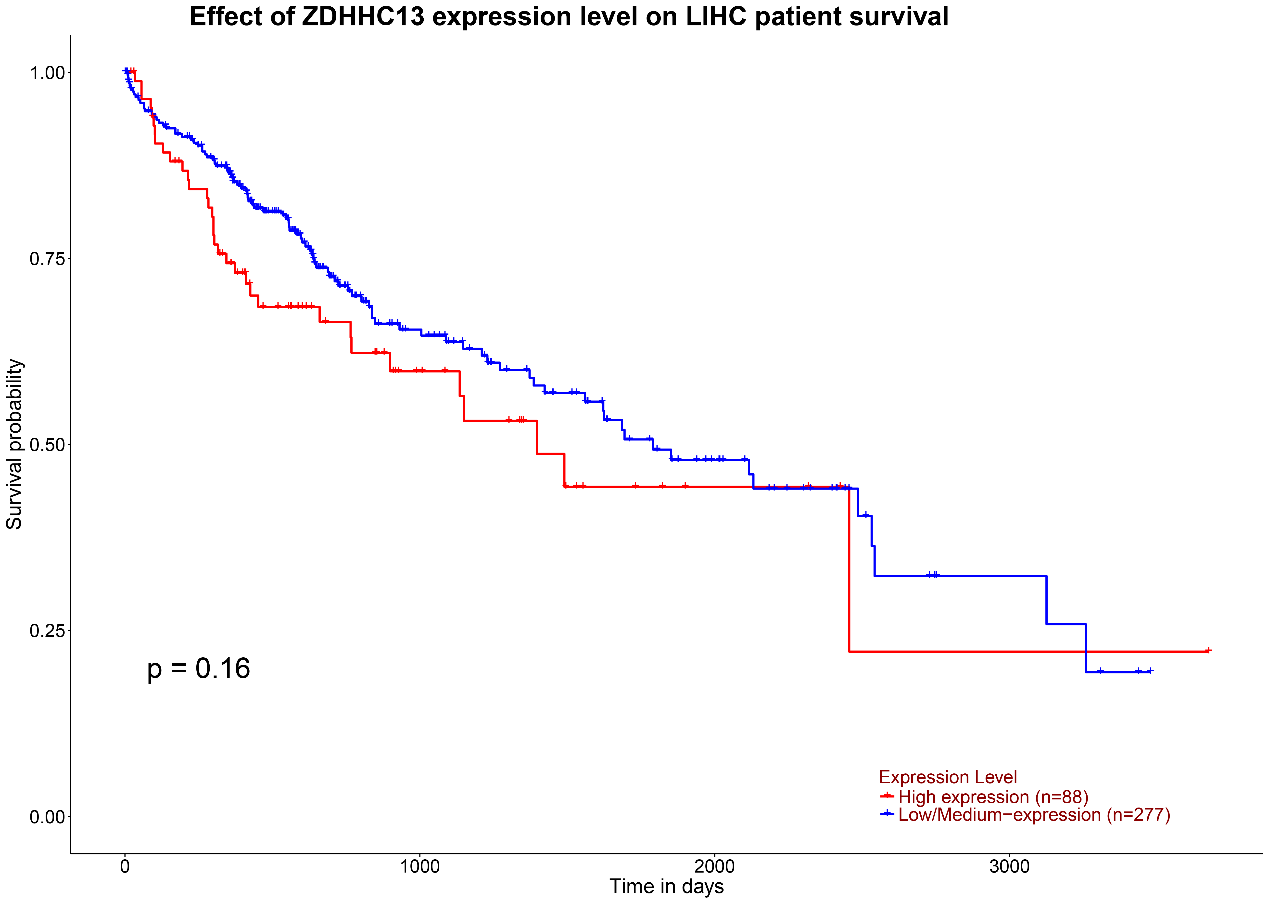
 **Effect of ZDHHC13 expression level on LIHC patient survival**
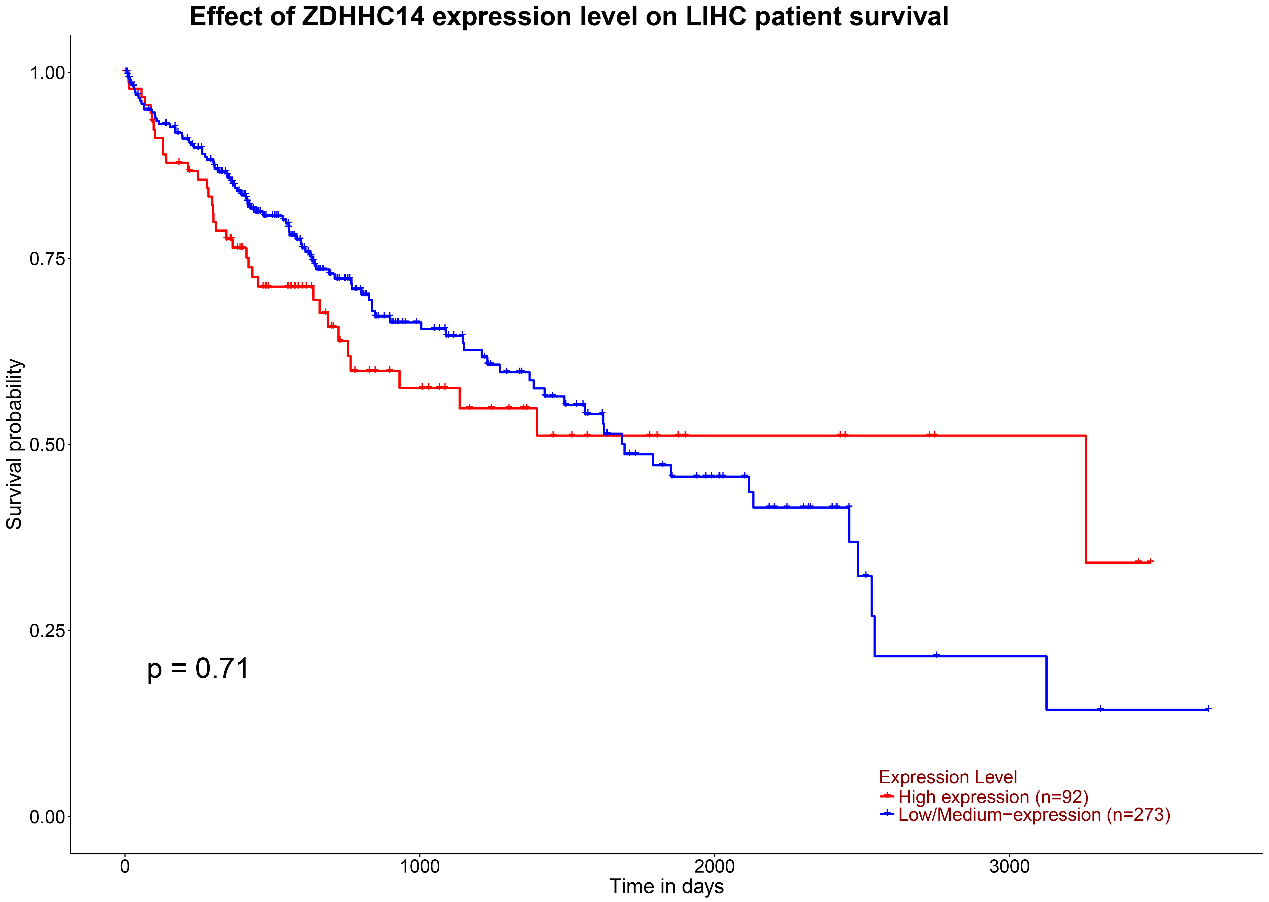
 **Effect of ZDHHC14 expression level on LIHC patient survival**


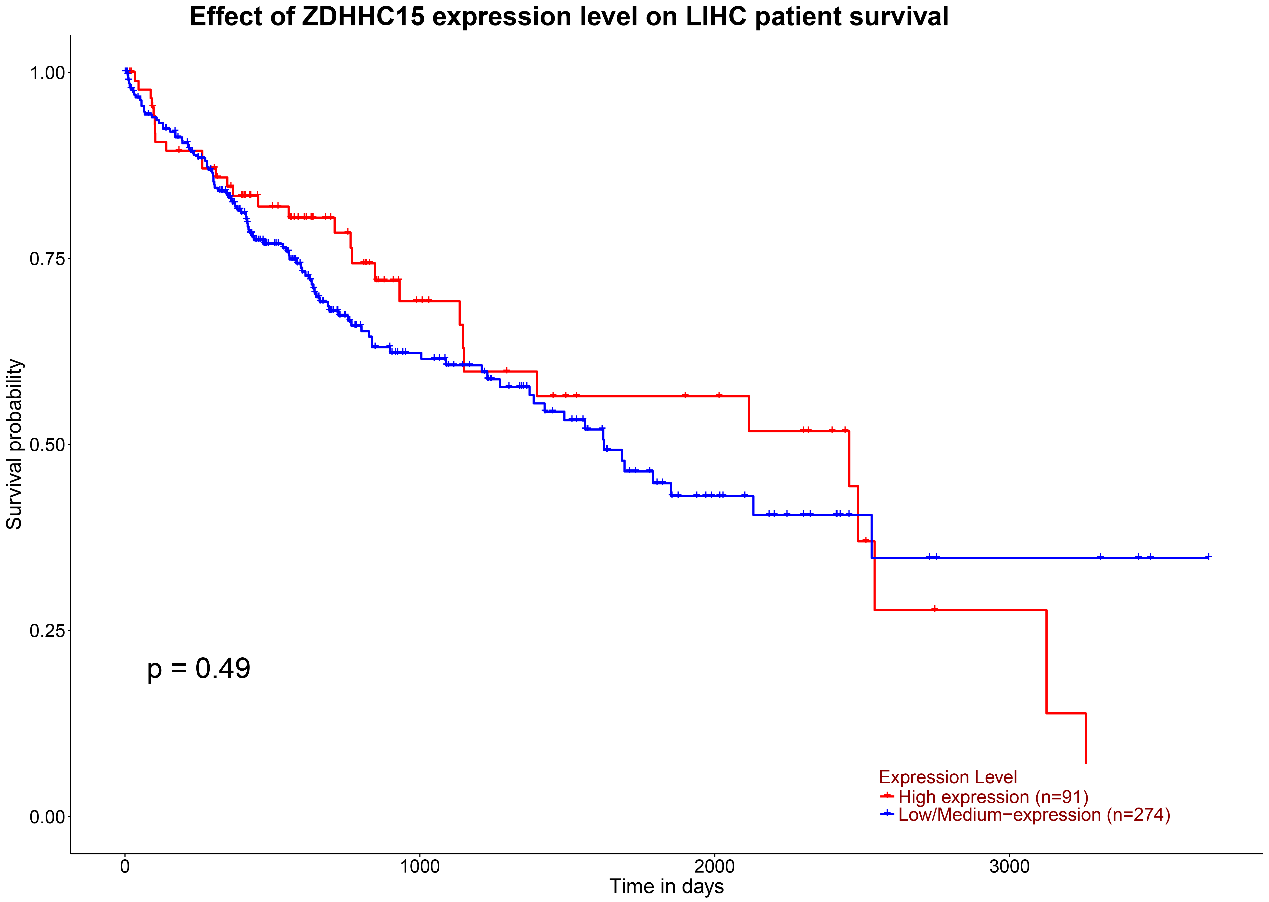
 **Effect of ZDHHC15 expression level on LIHC patient survival**


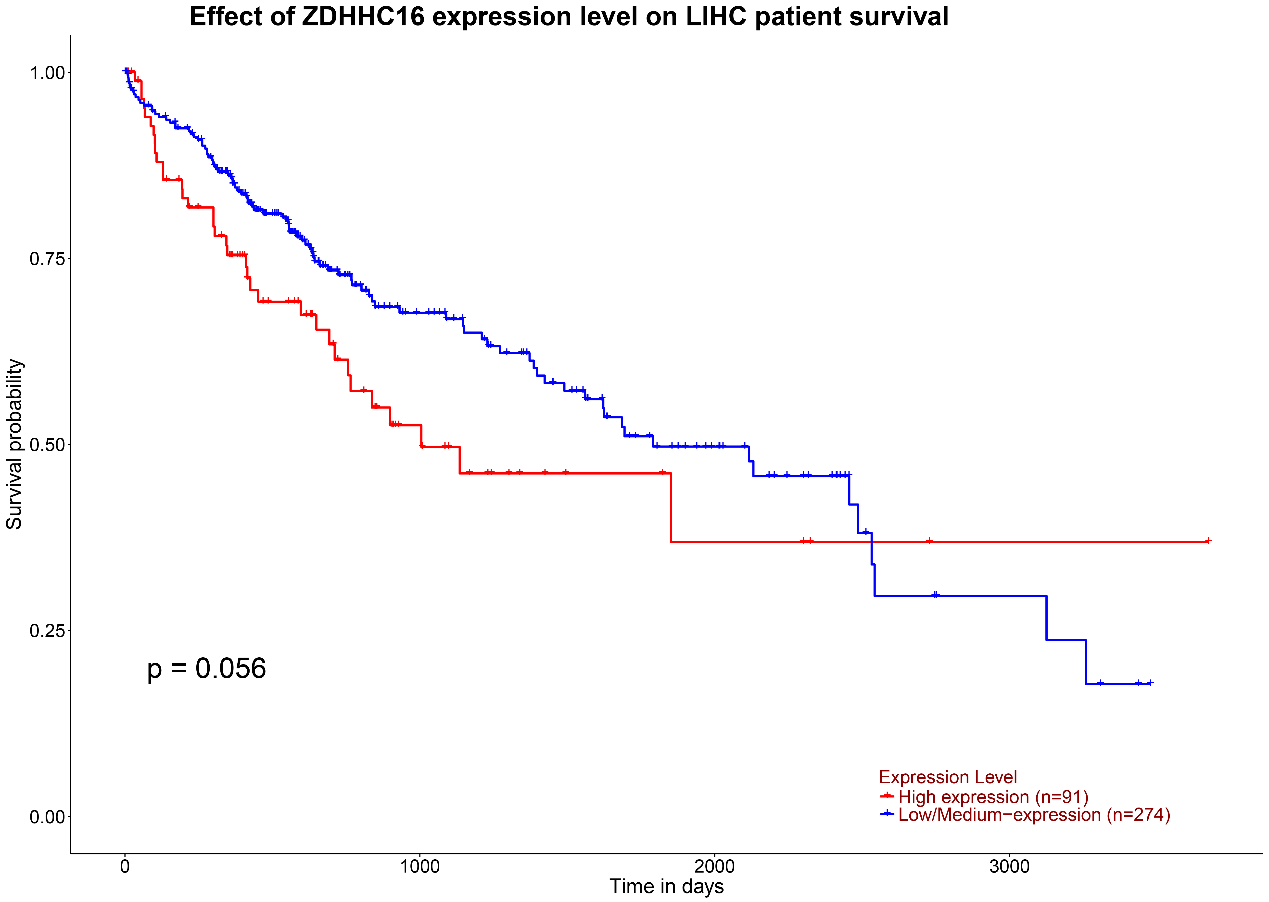
 **Effect of ZDHHC16 expression level on LIHC patient survival**


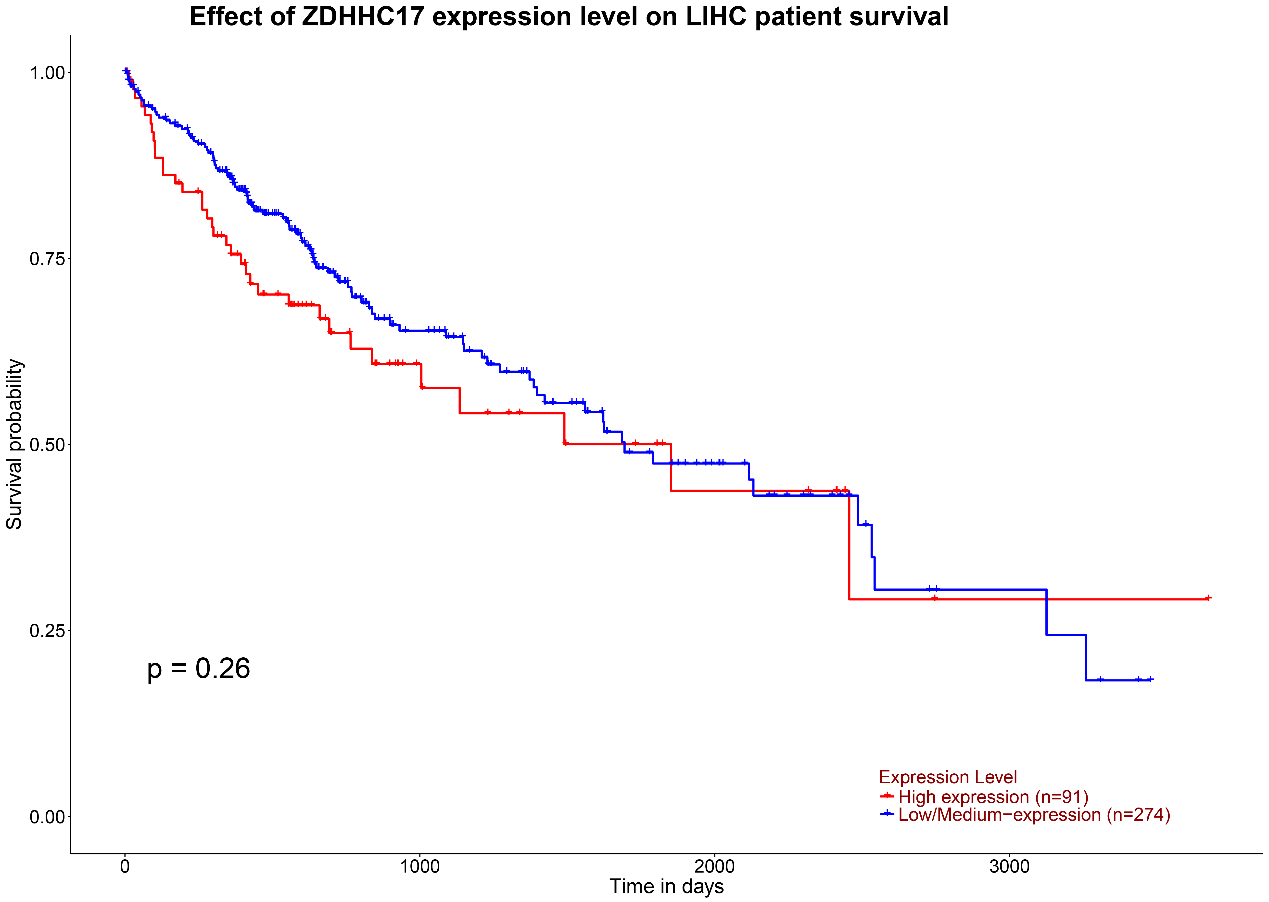
 **Effect of ZDHHC17 expression level on LIHC patient survival**
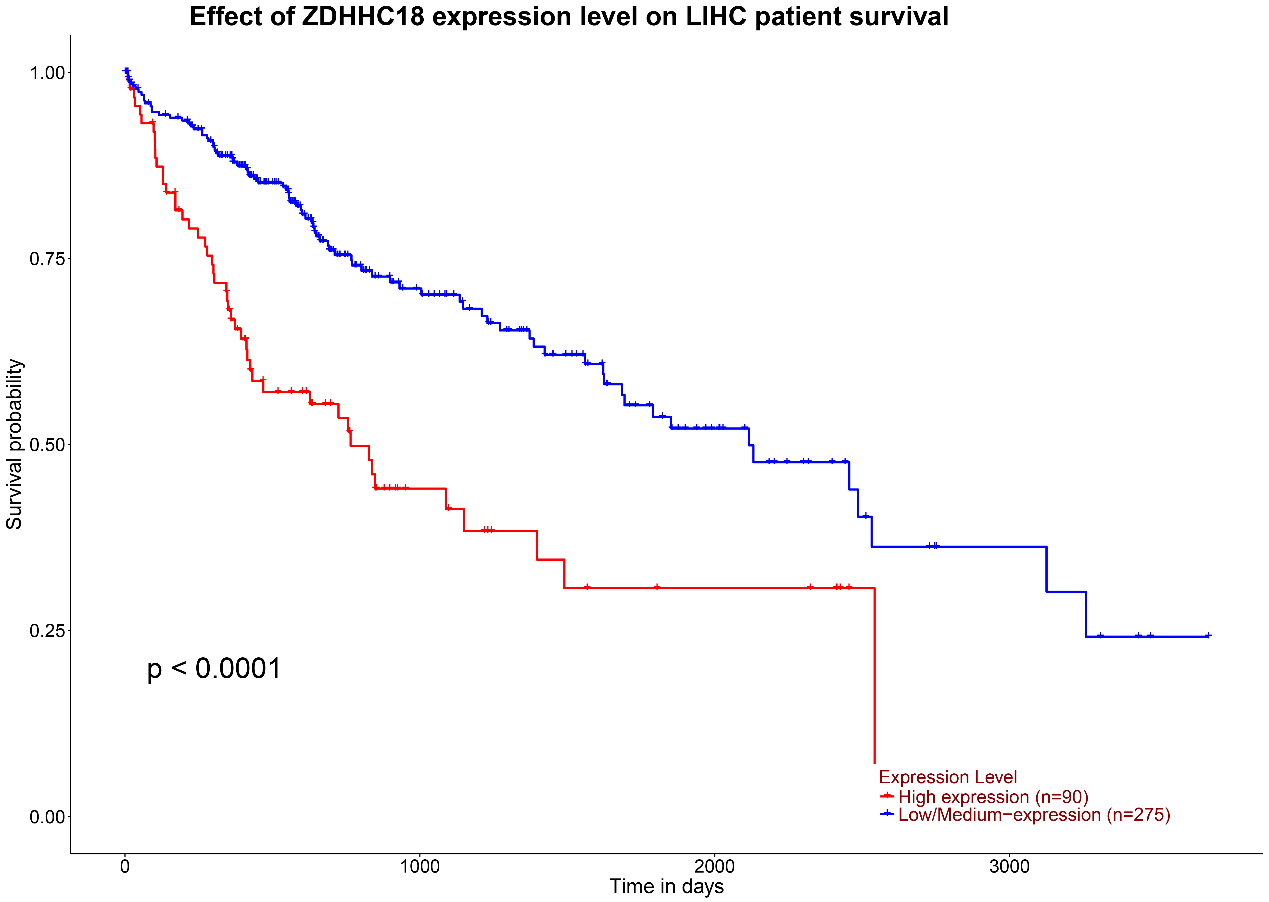
 **Effect of ZDHHC18 expression level on LIHC patient survival**


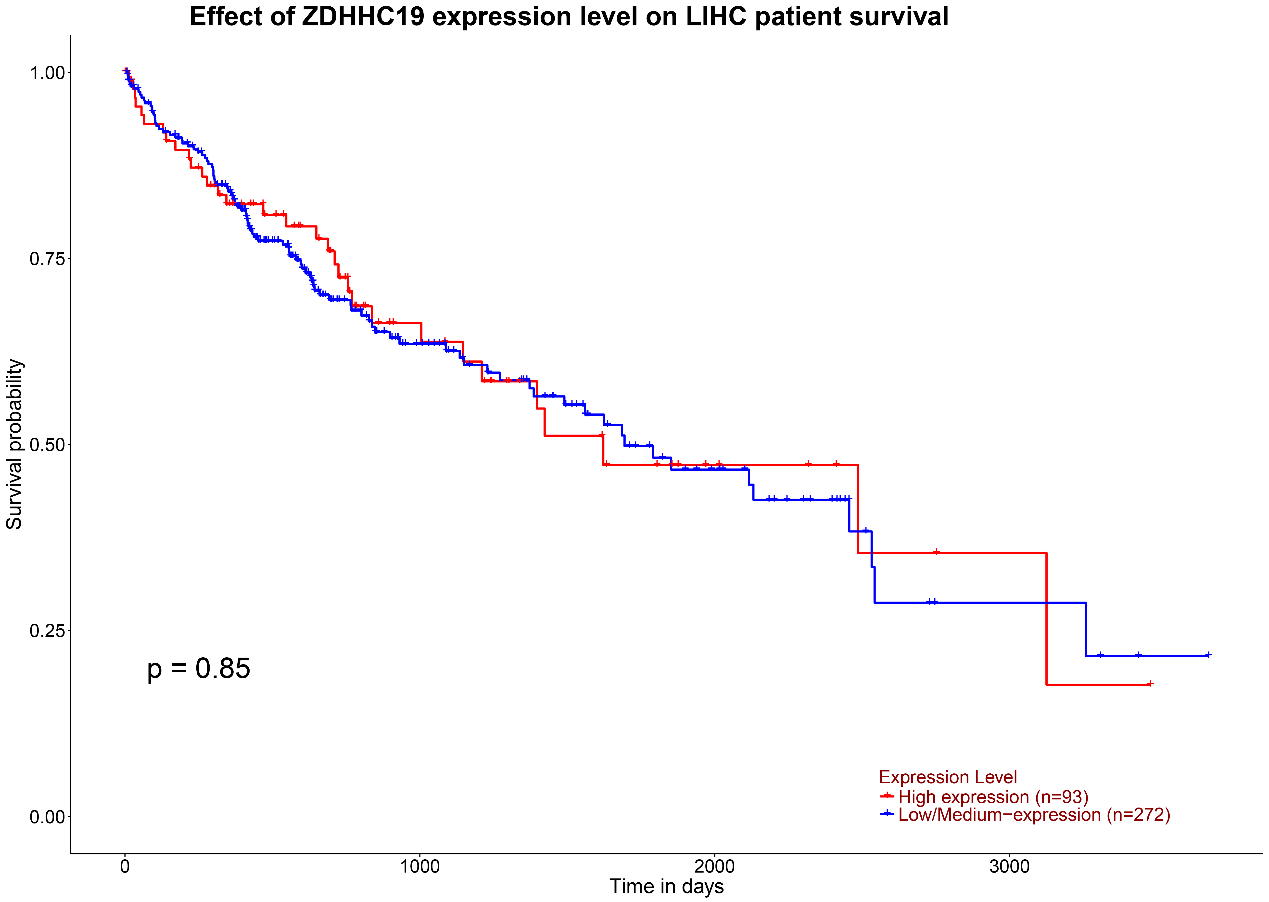
 **Effect of ZDHHC19 expression level on LIHC patient survival**
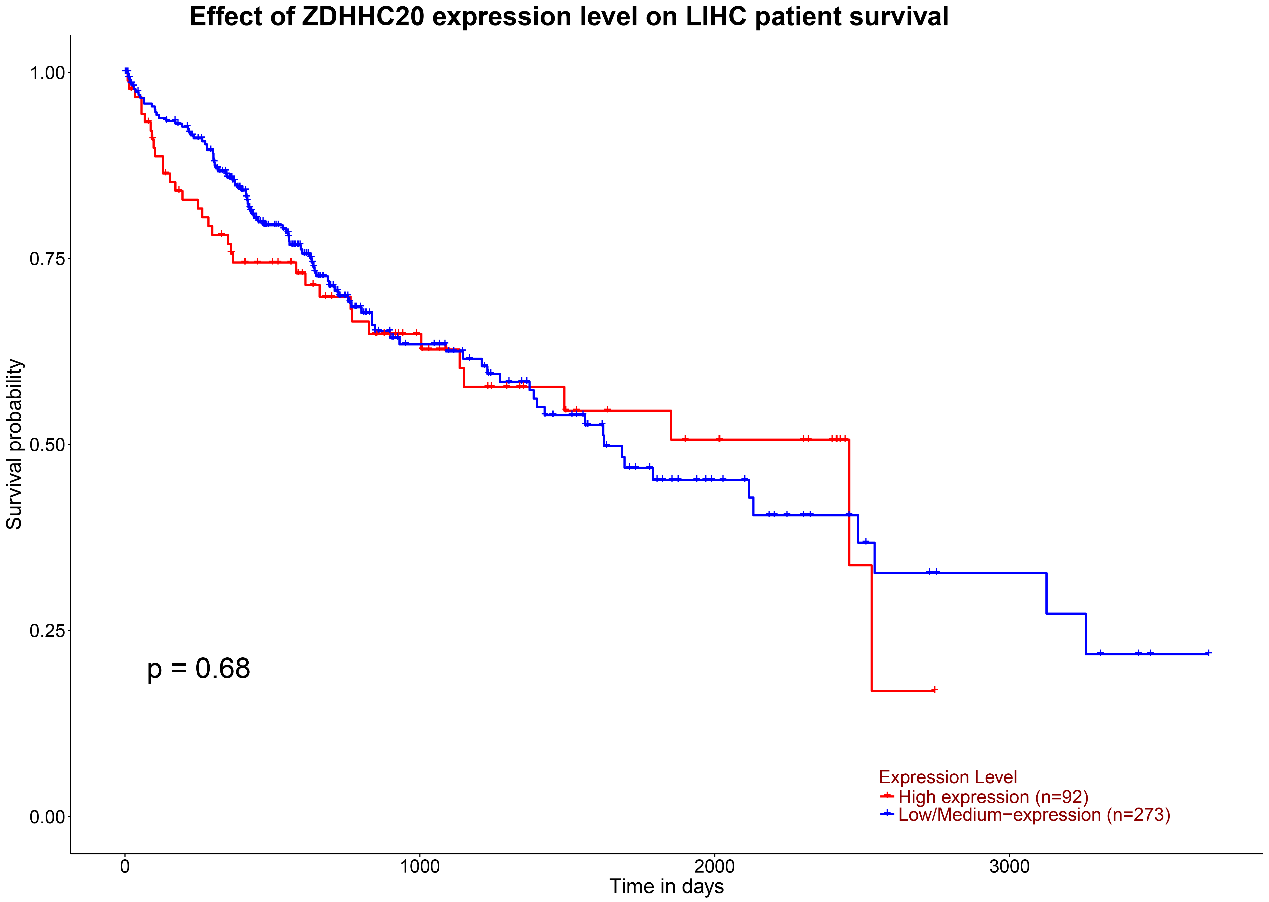
 **Effect of ZDHHC20 expression level on LIHC patient survival**


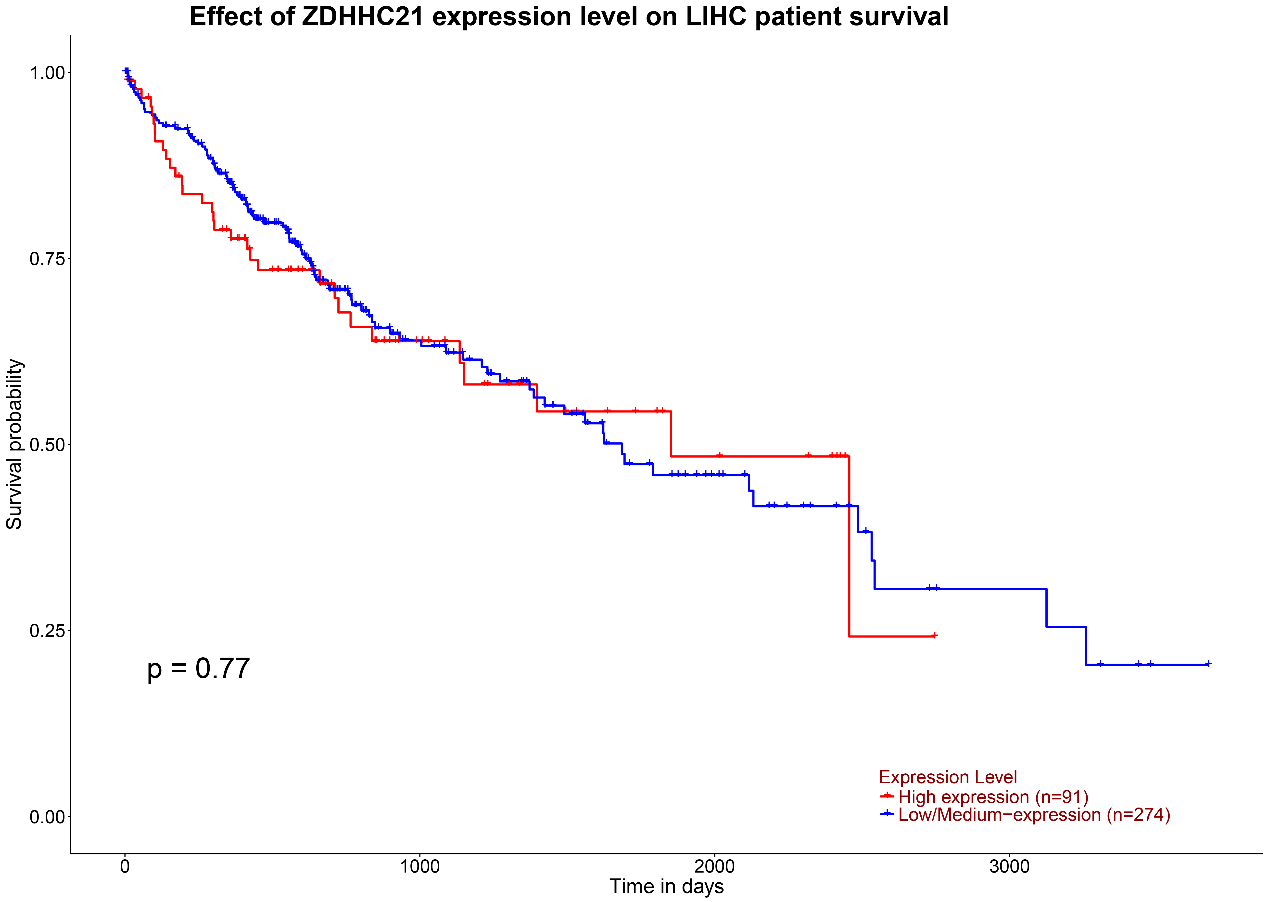
 **Effect of ZDHHC21 expression level on LIHC patient survival**
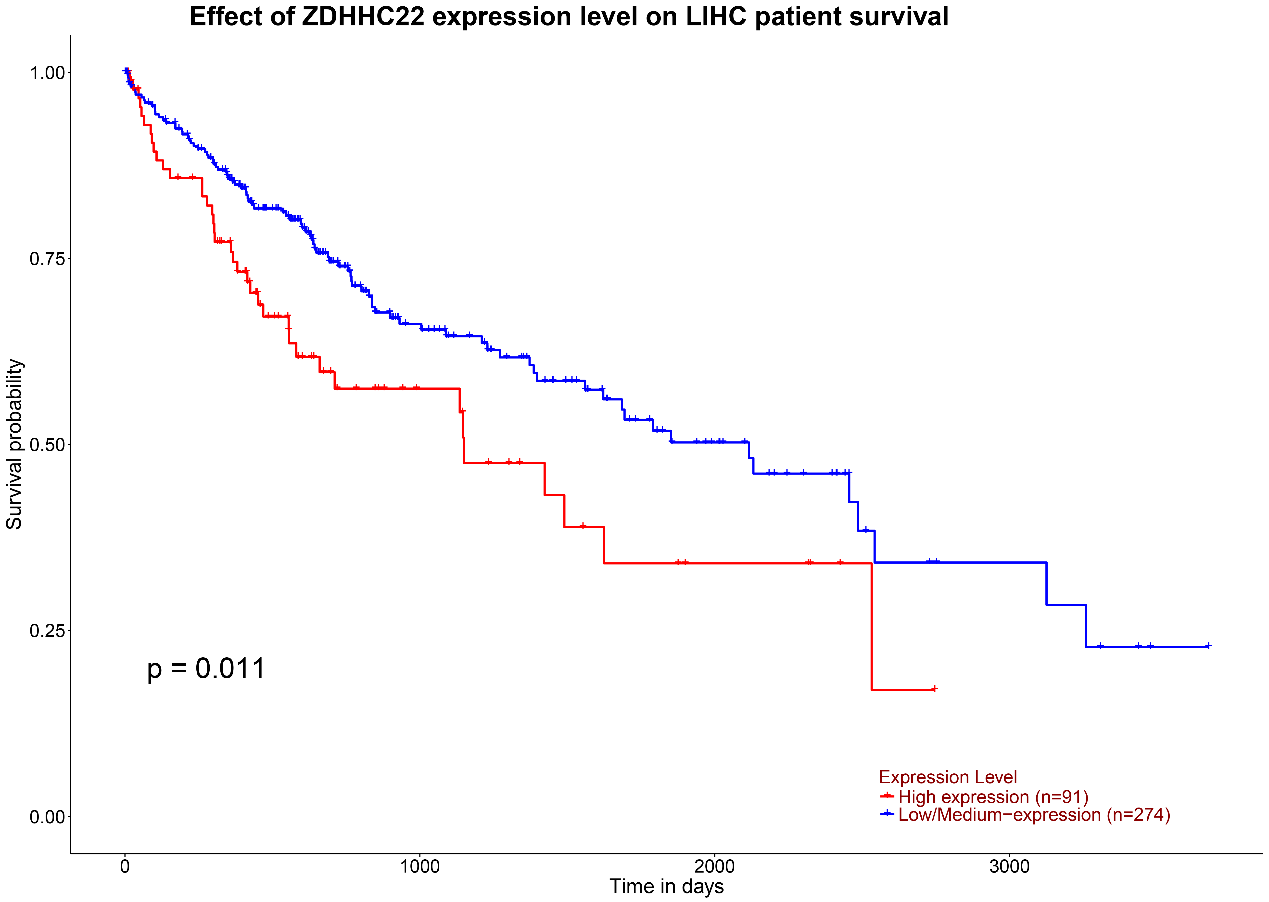
 **Effect of ZDHHC22 expression level on LIHC patient survival**


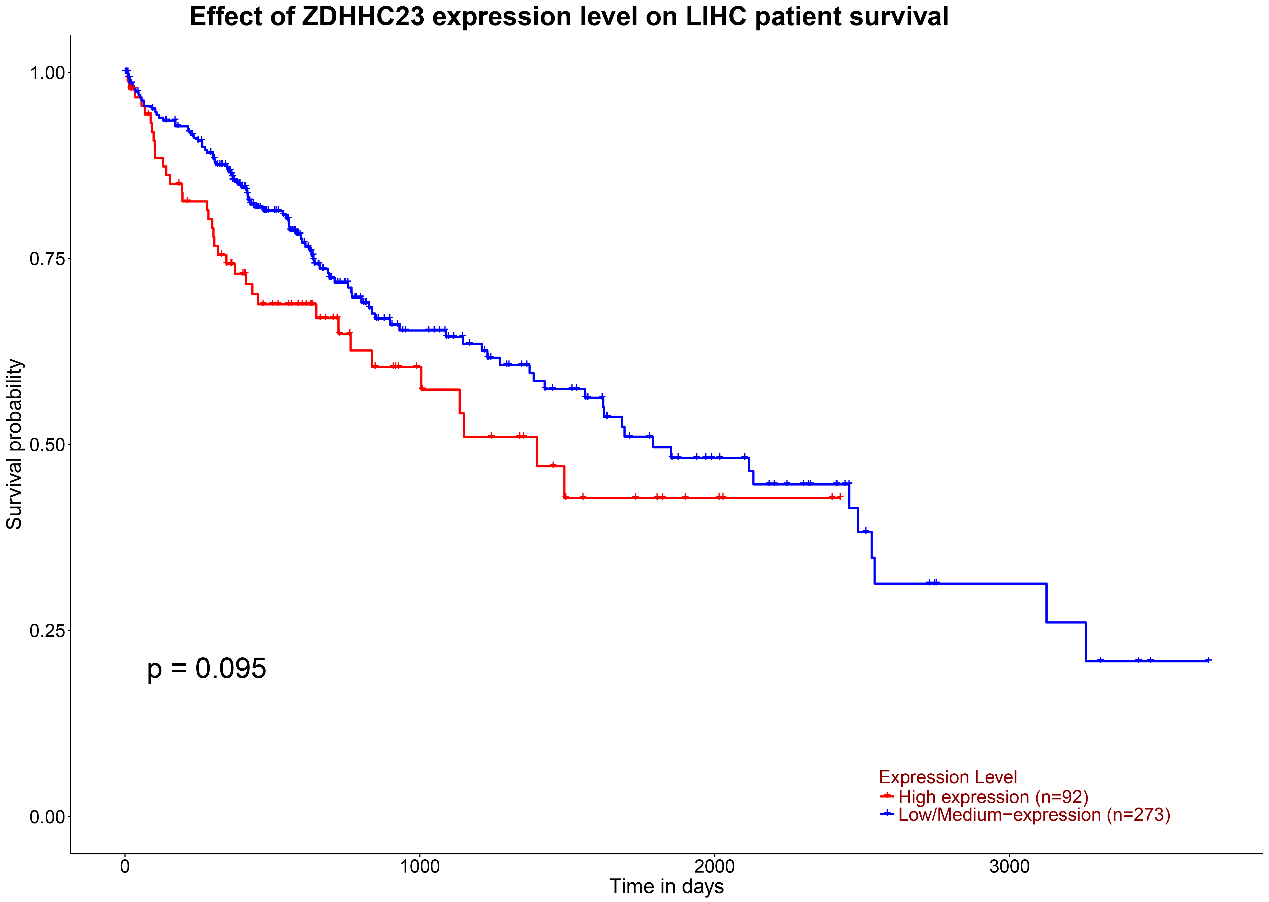
 **Effect of ZDHHC23 expression level on LIHC patient survival**
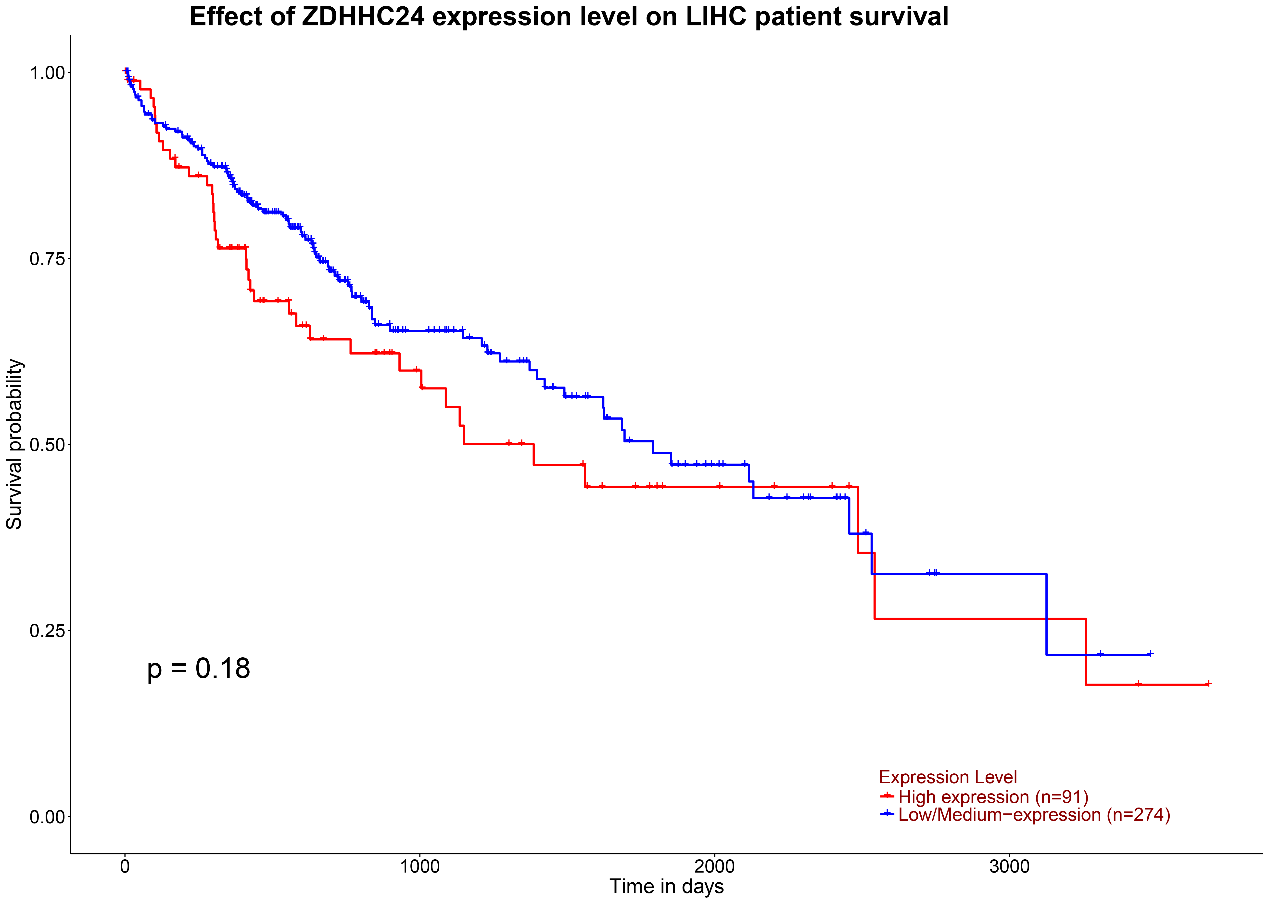
 **Effect of ZDHHC24 expression level on LIHC patient survival**


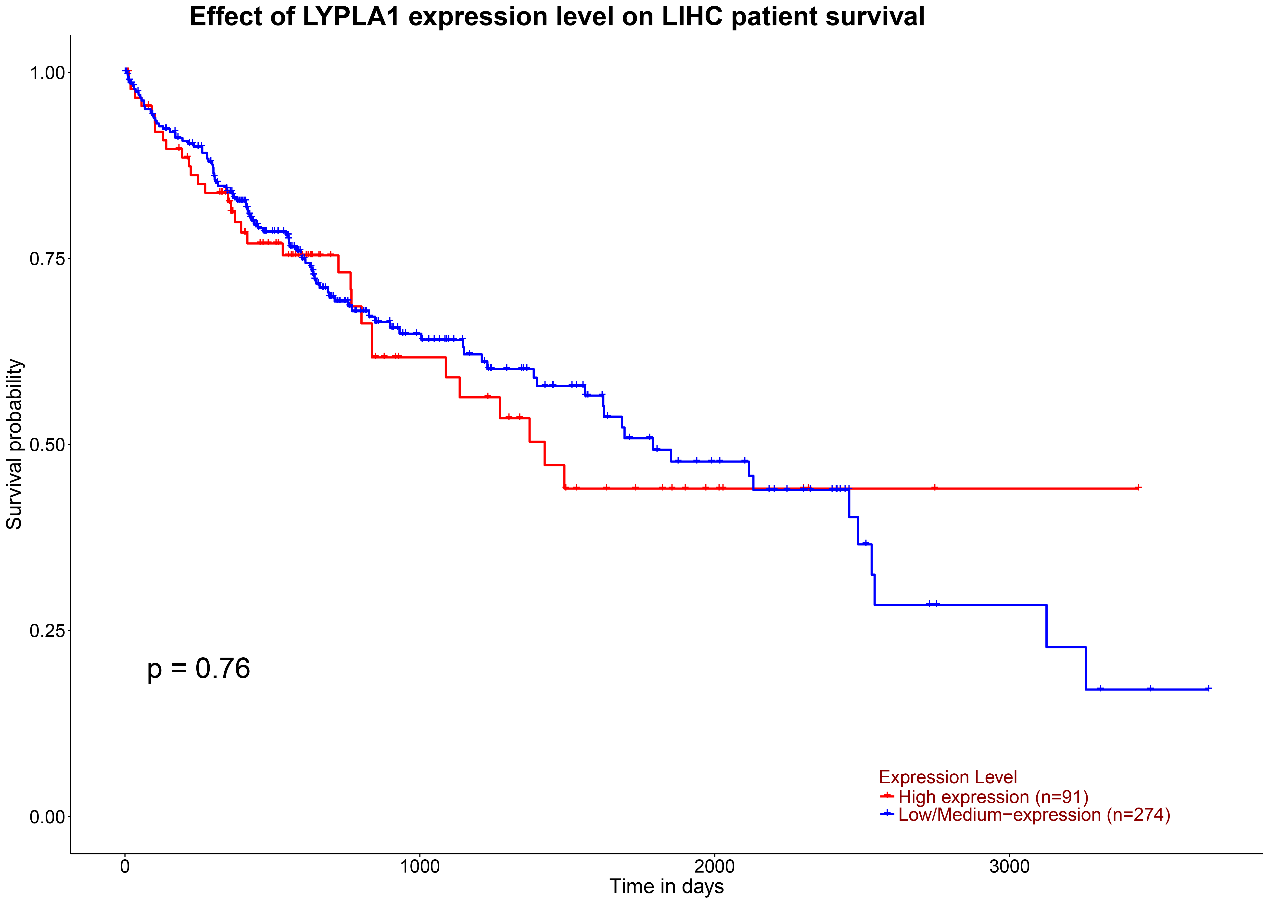
 **Effect of LYPLA1 expression level on LIHC patient survival**
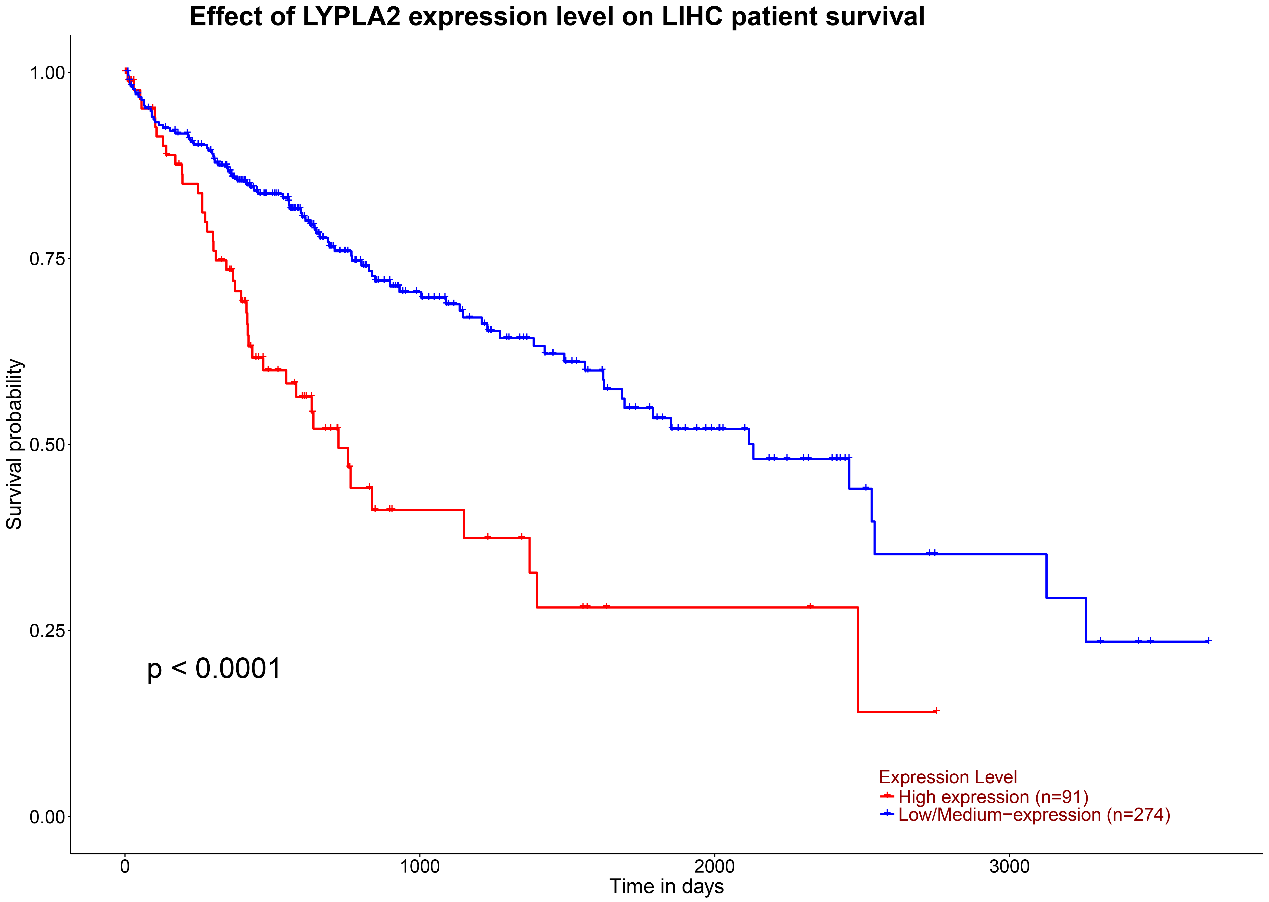
**Effect of LYPLA2 expression level on LIHC patient survival**


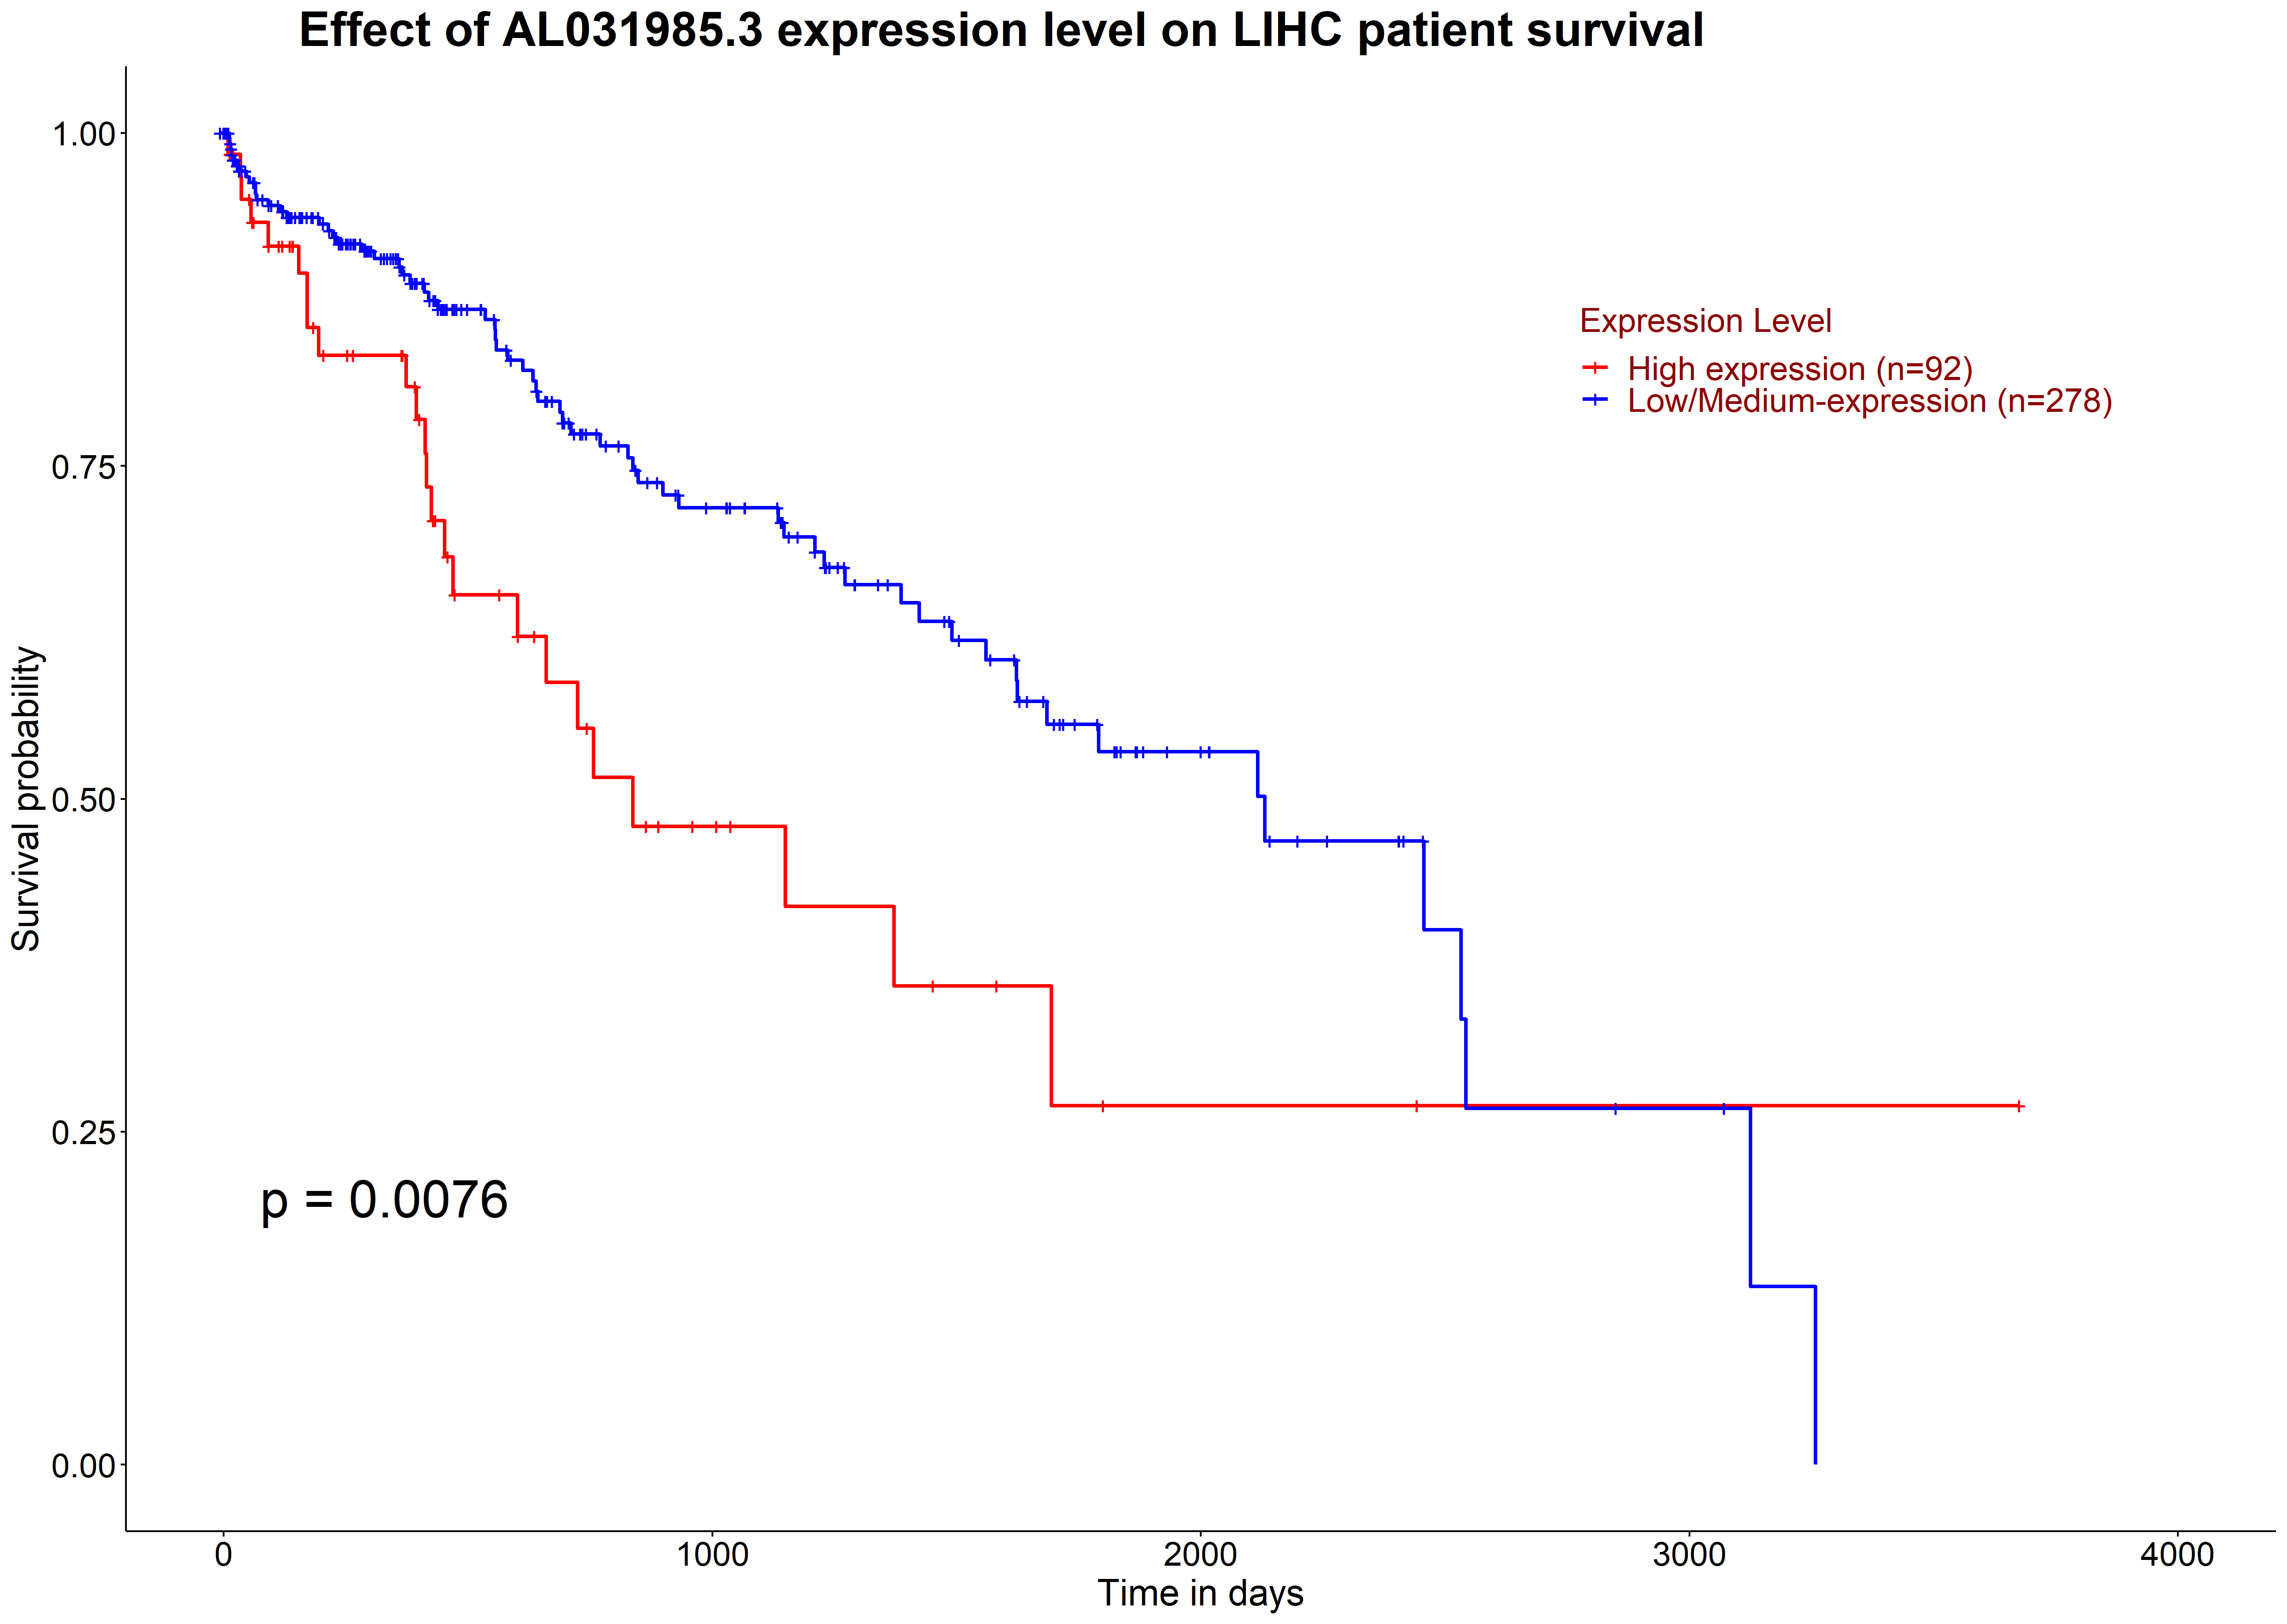
 **Effect of AL031985.3 expression level on LIHC patient survival**


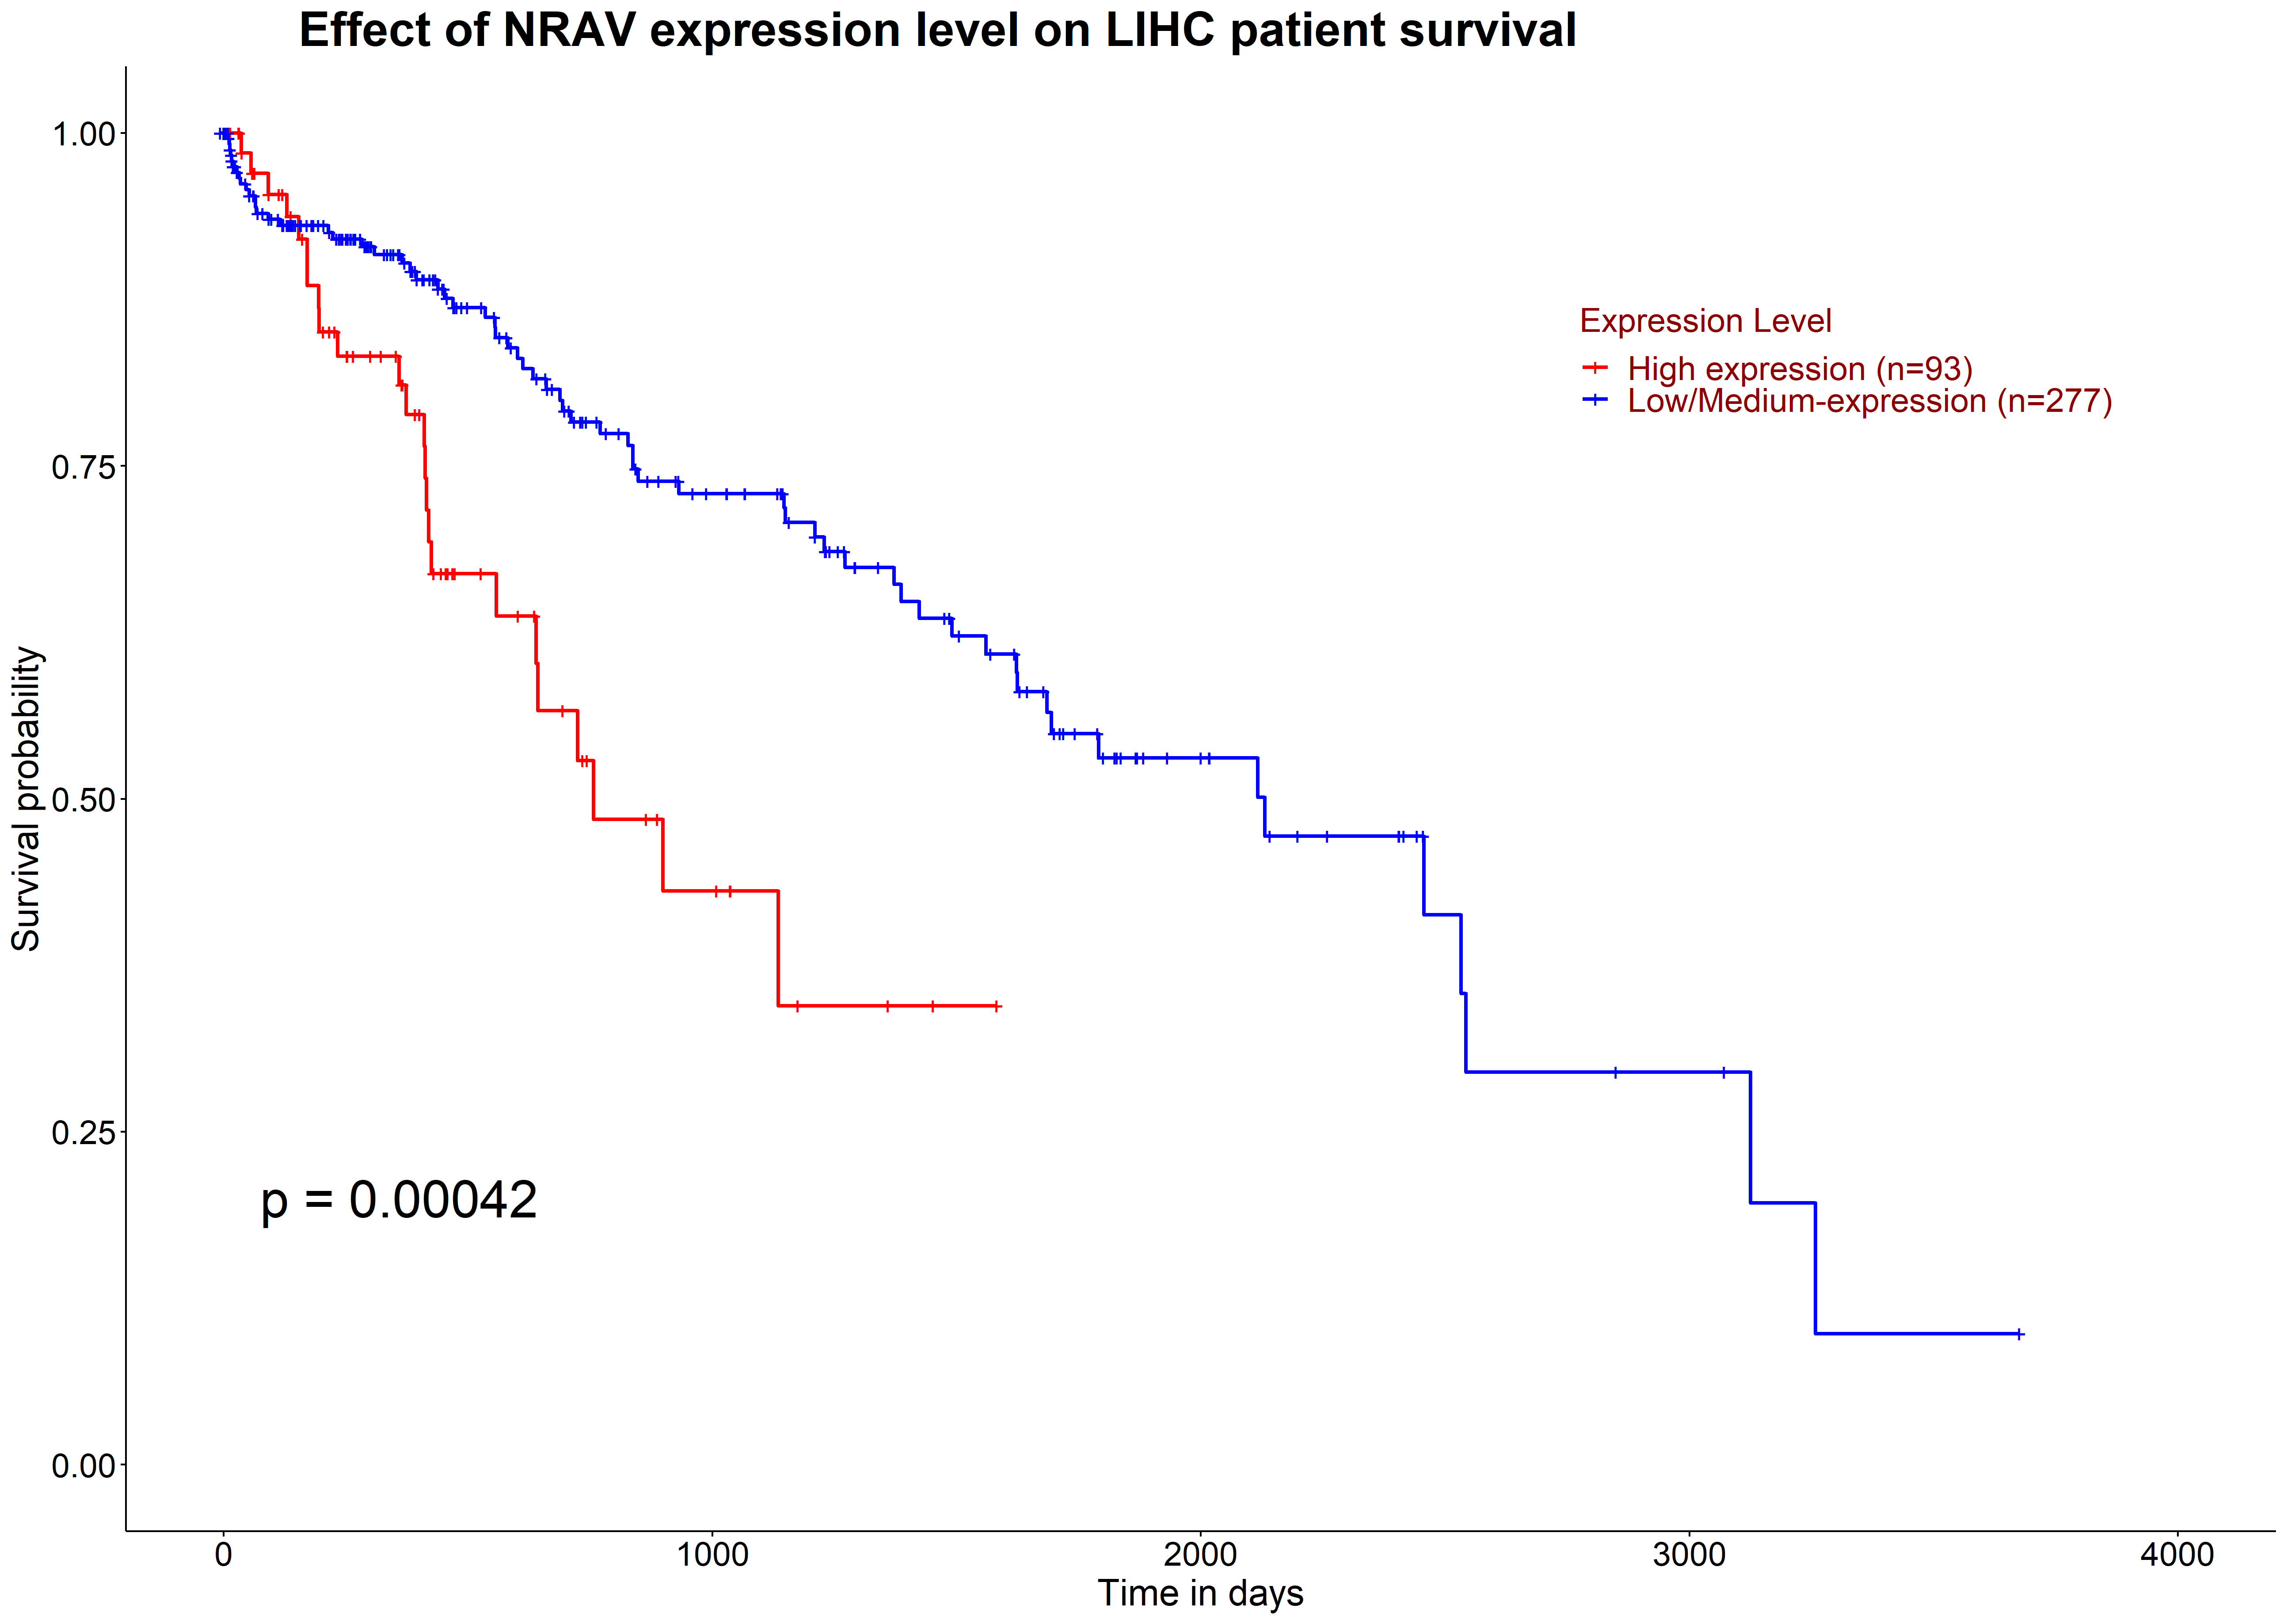
 **Effect of NRAV expression level on LIHC patient survival**

**Supplementary Figure 2: Differential analysis of drug sensitivity in HCC patients with different risk groups. Supplementary Figure 2 includes a total of 144 images. To maintain image quality, individual images are supplied separately.**


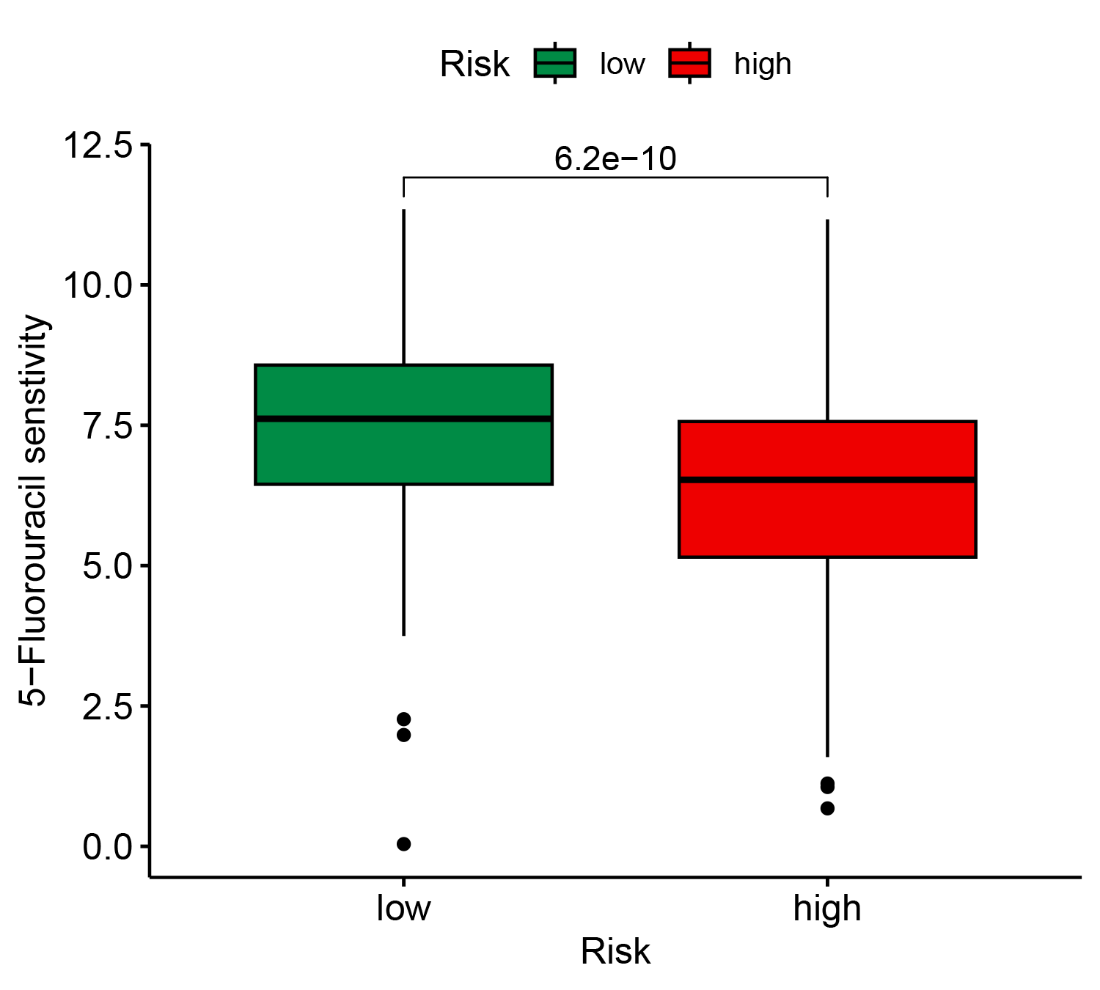

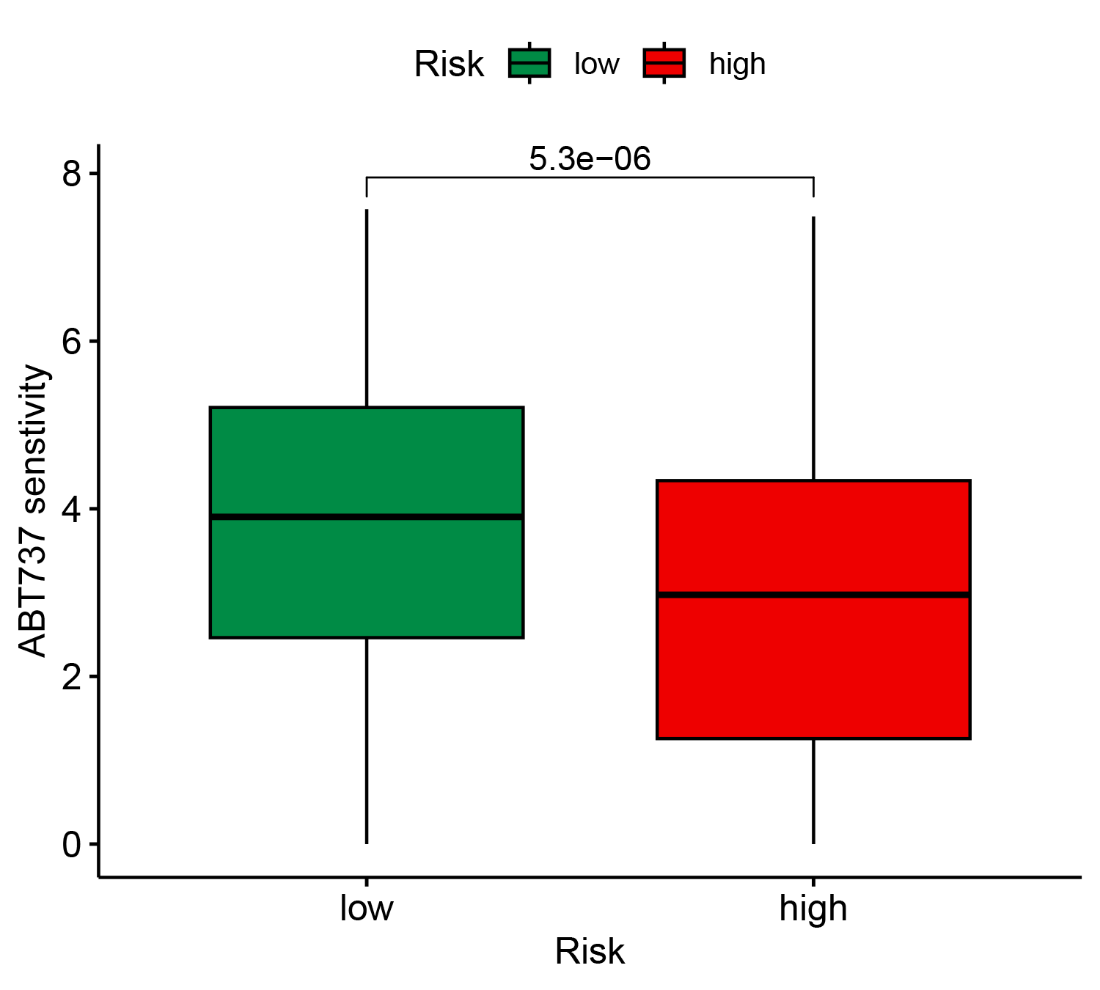

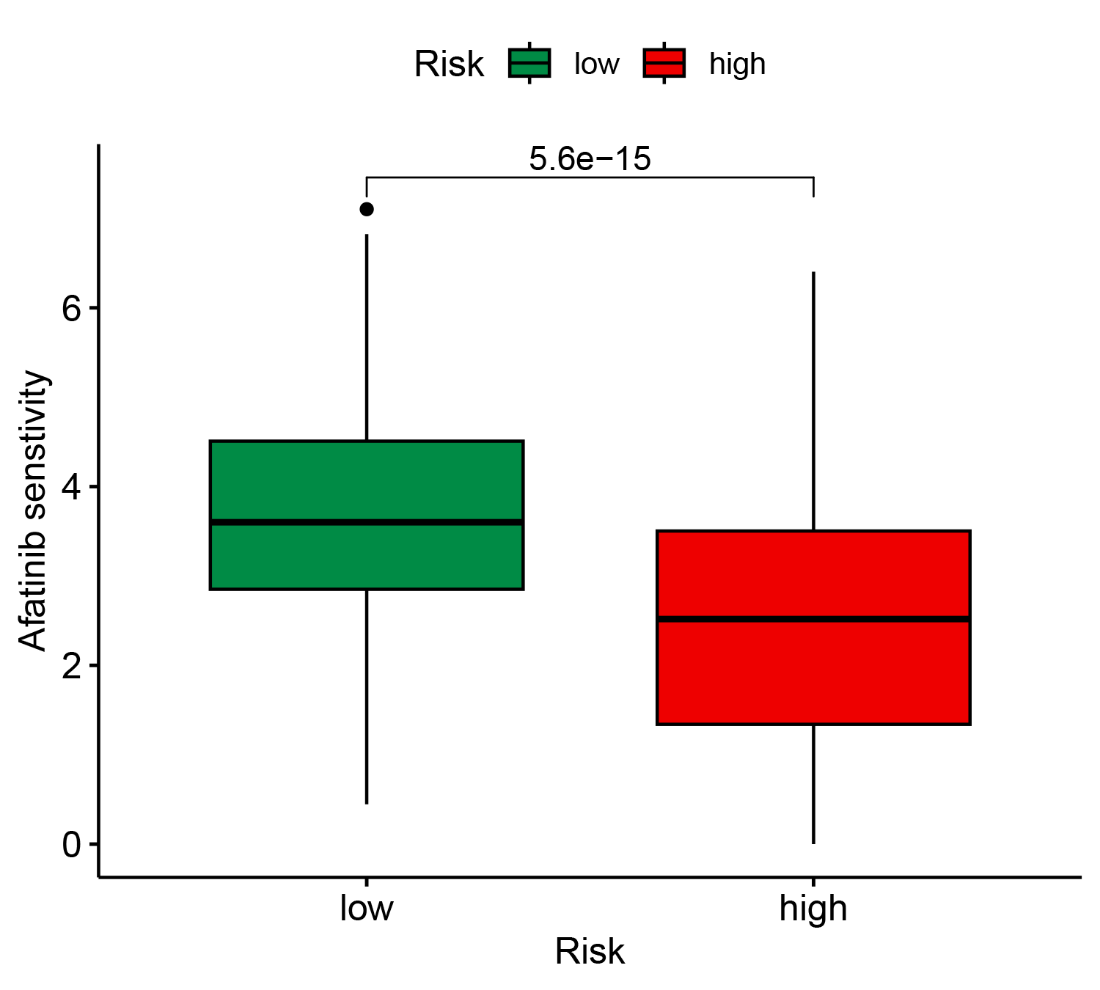

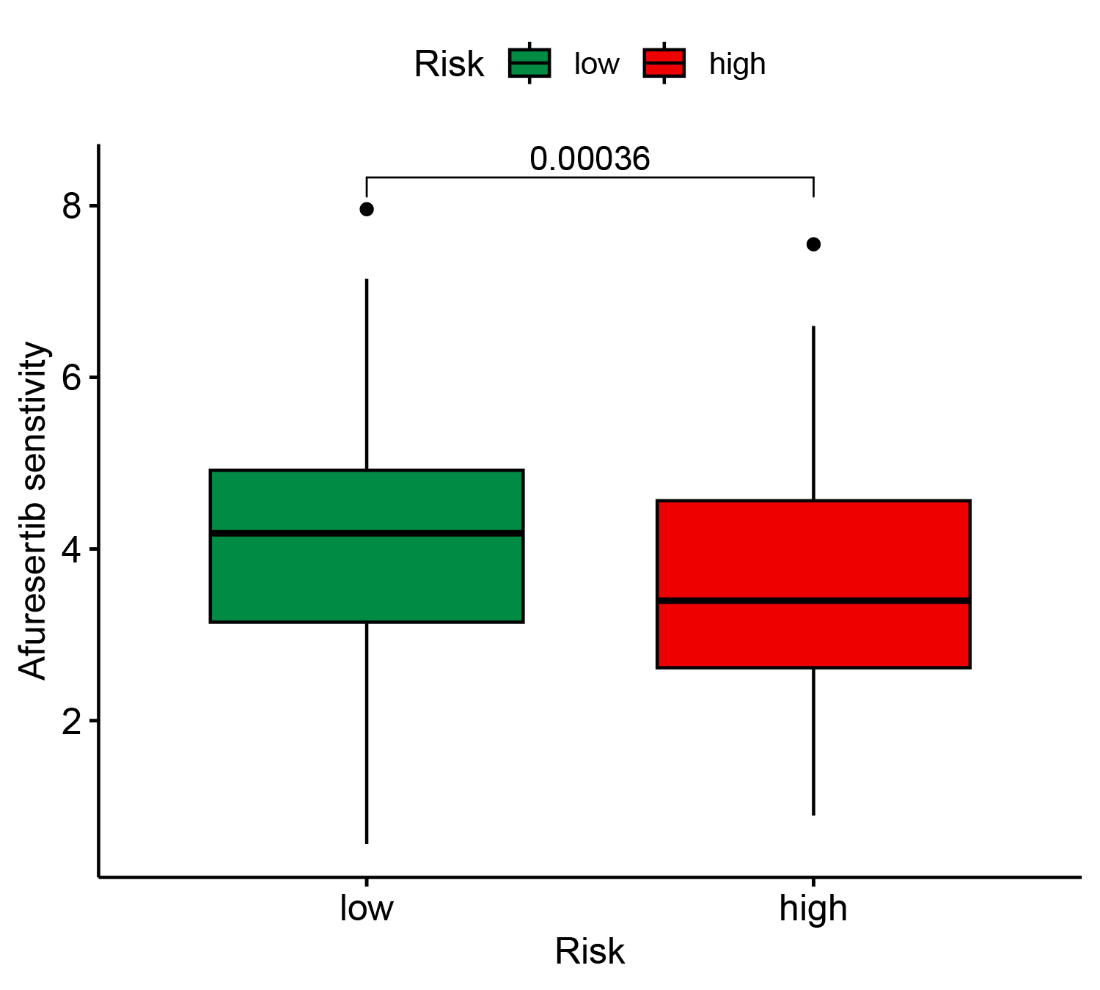

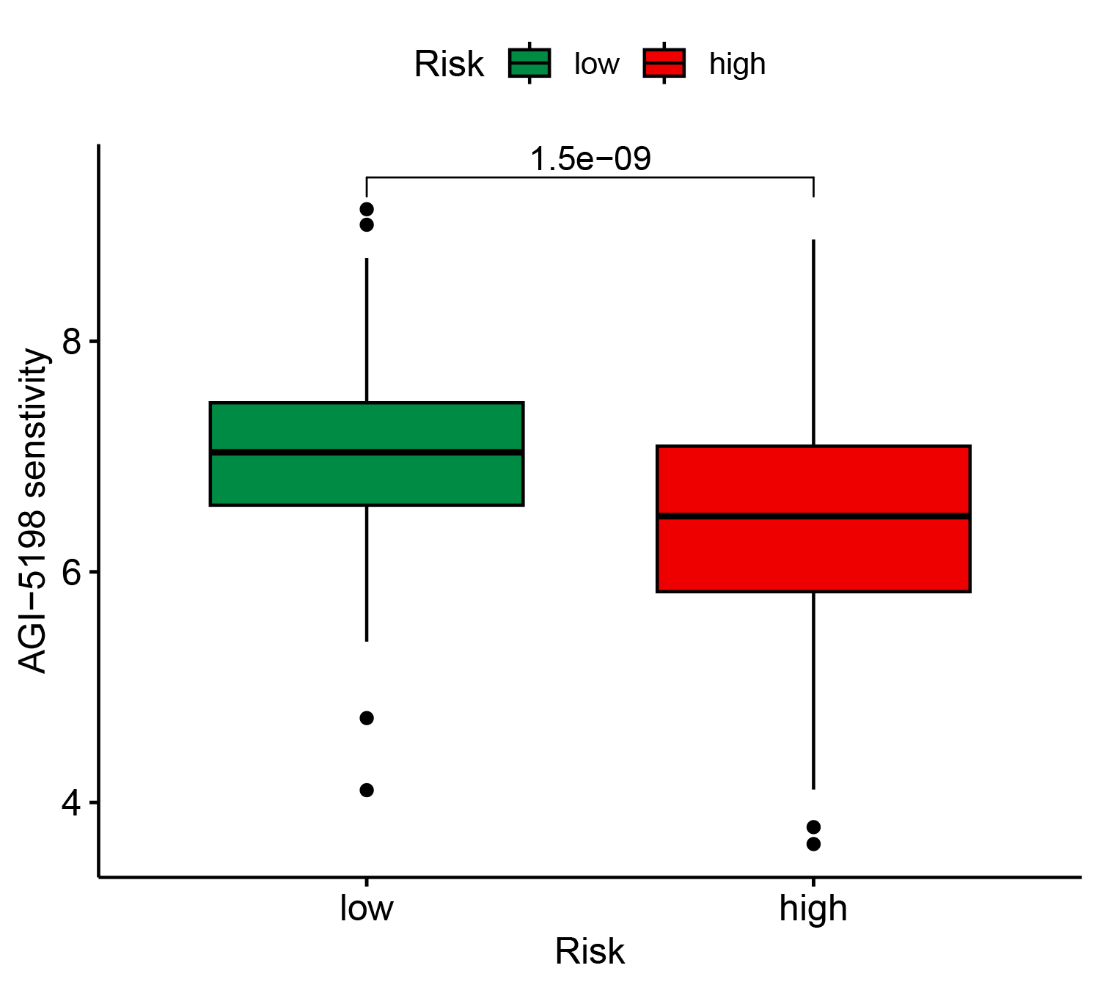

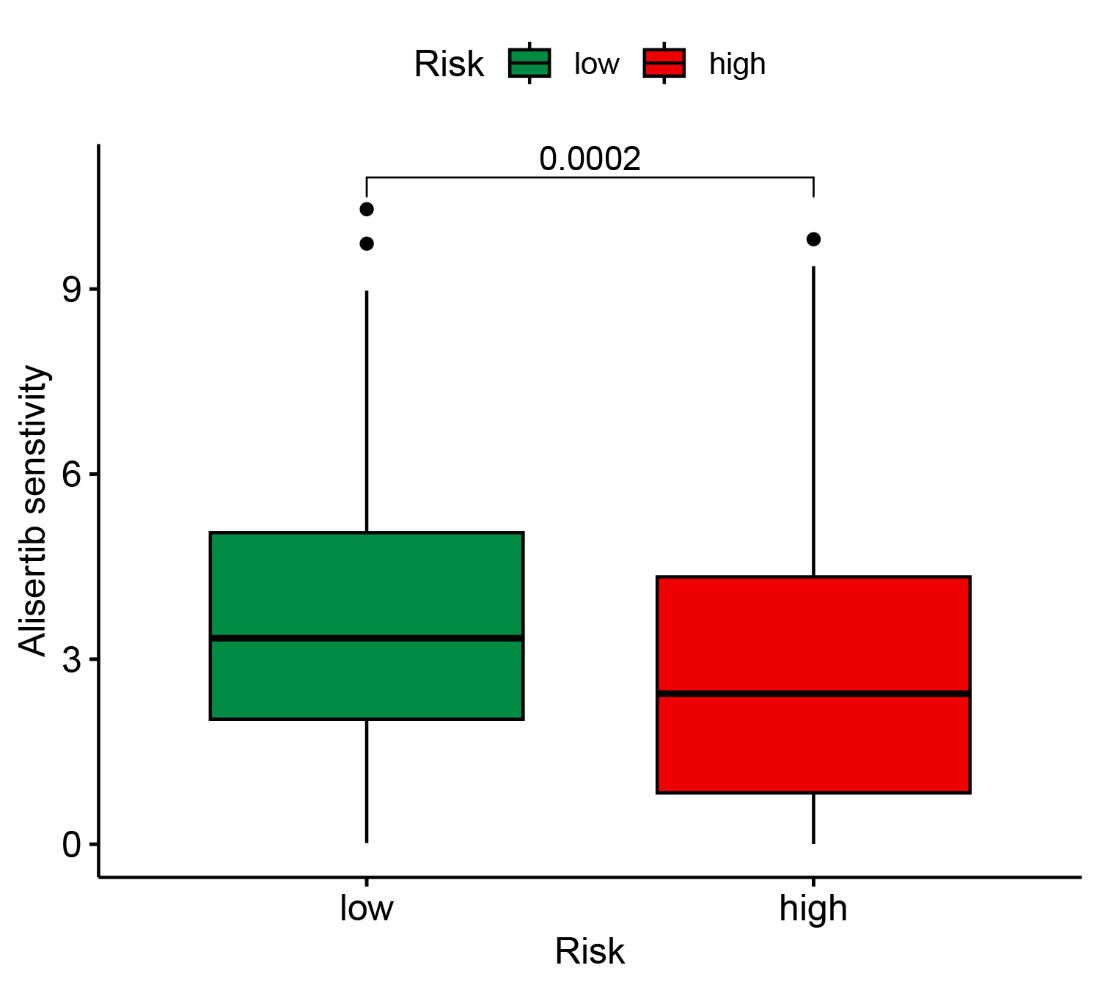

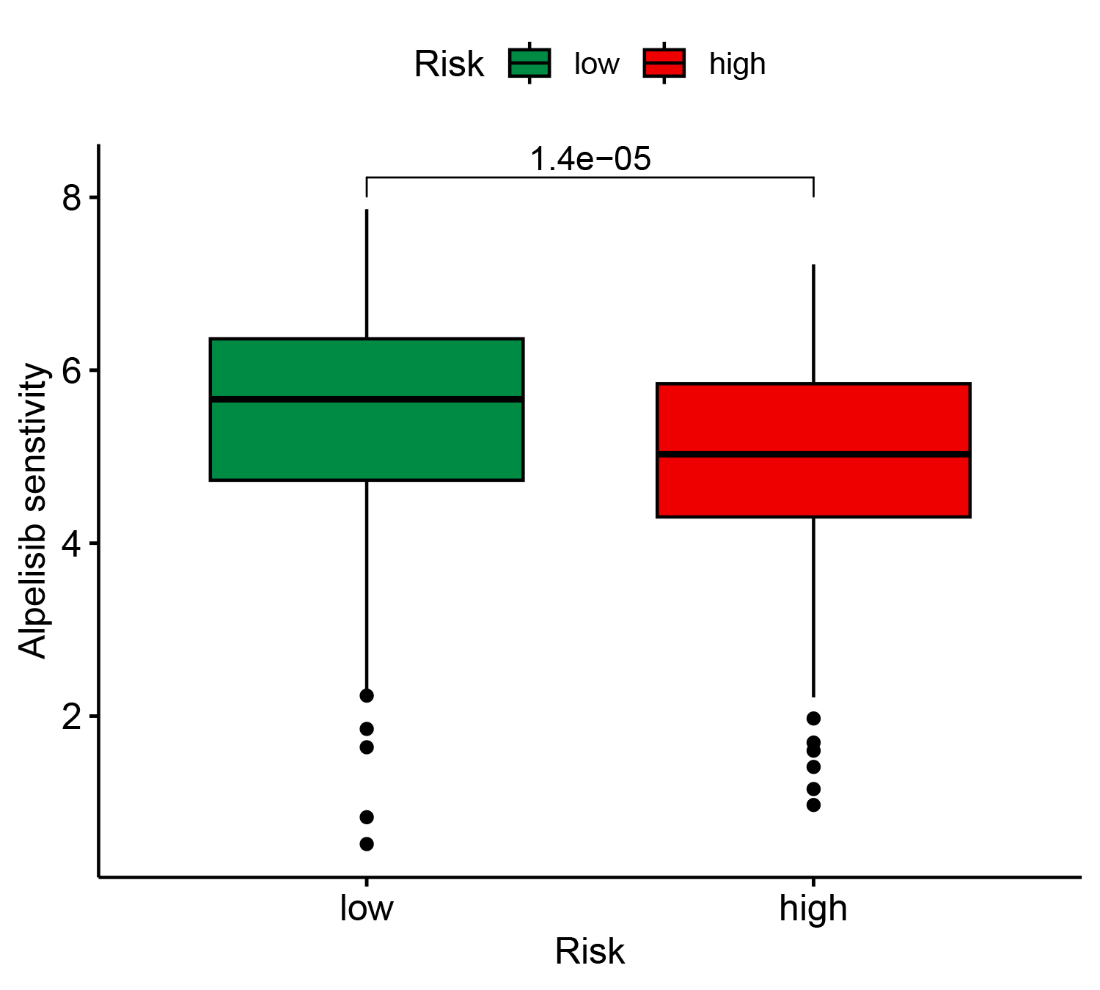

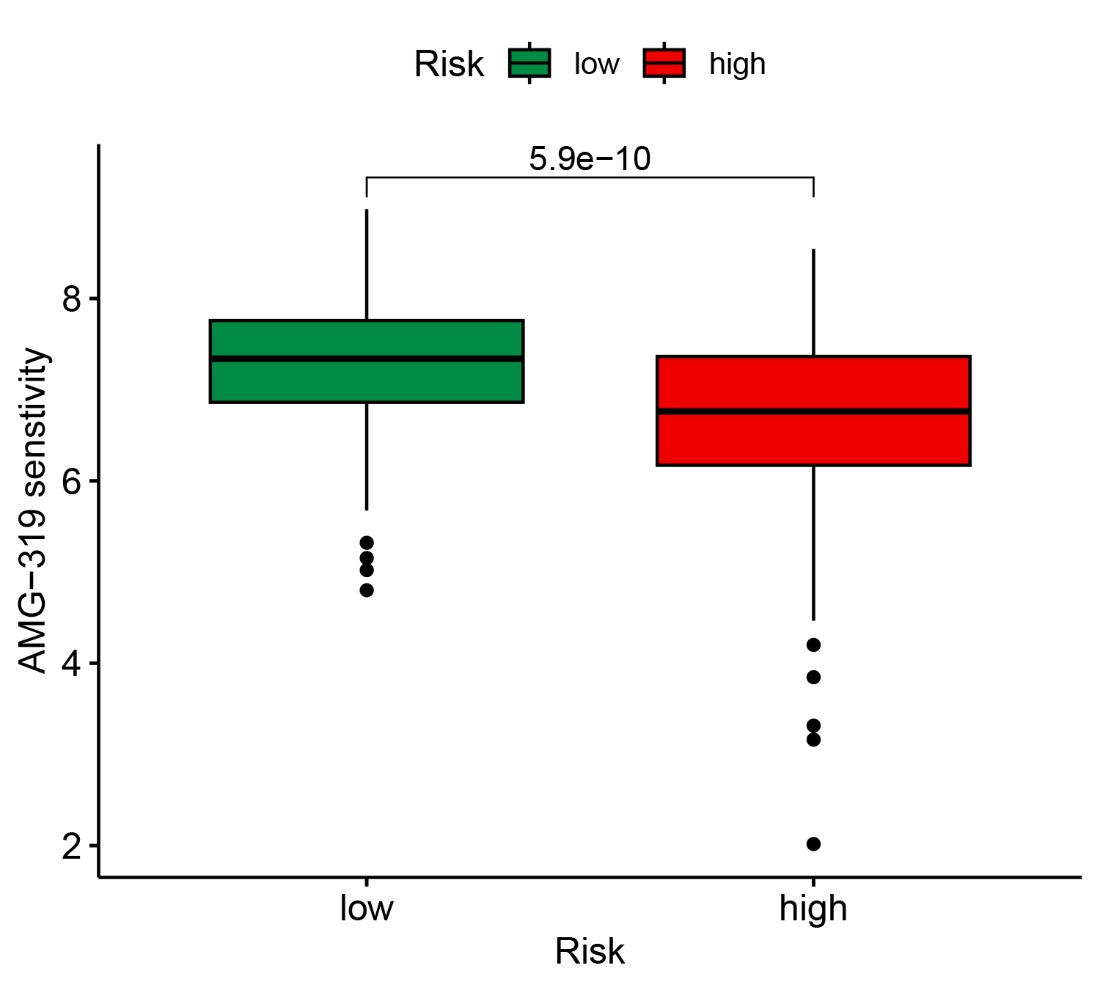

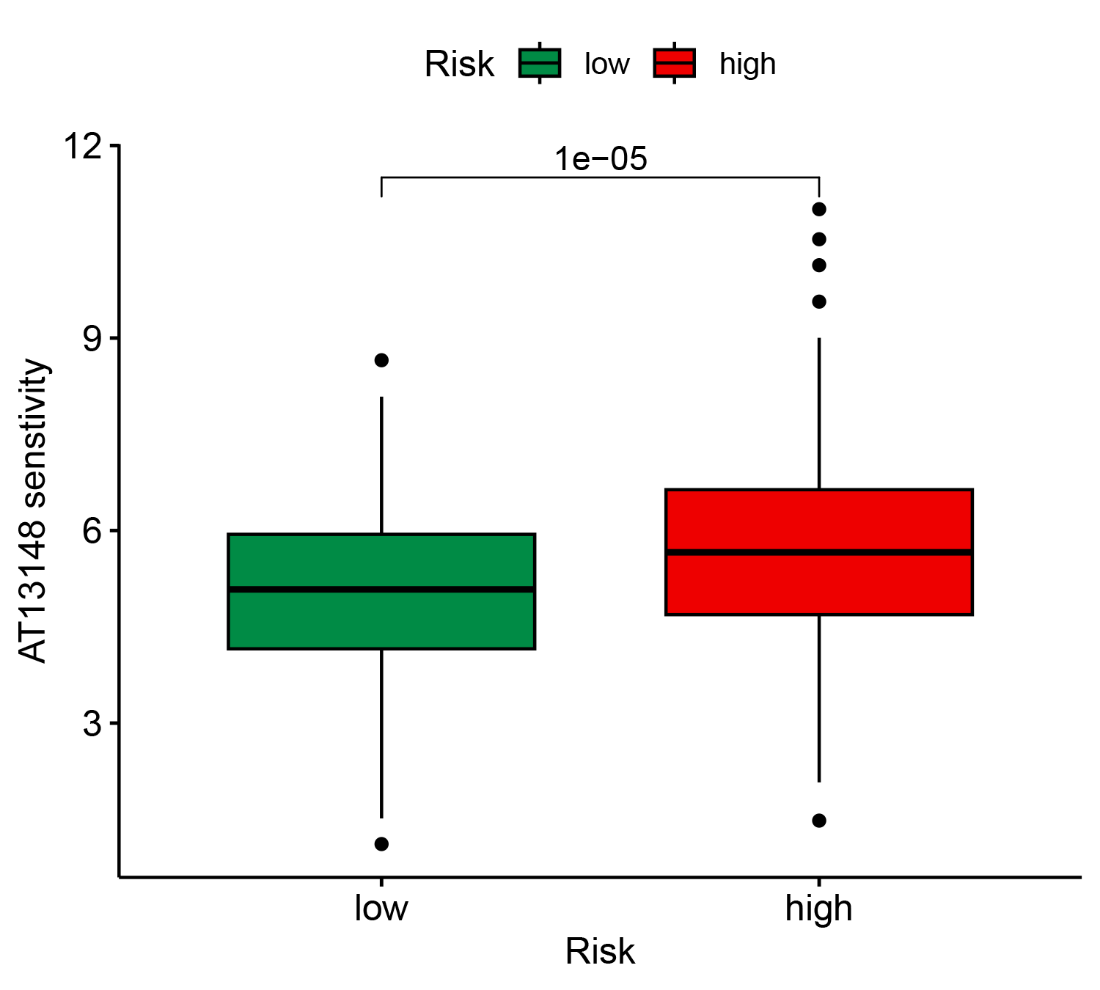

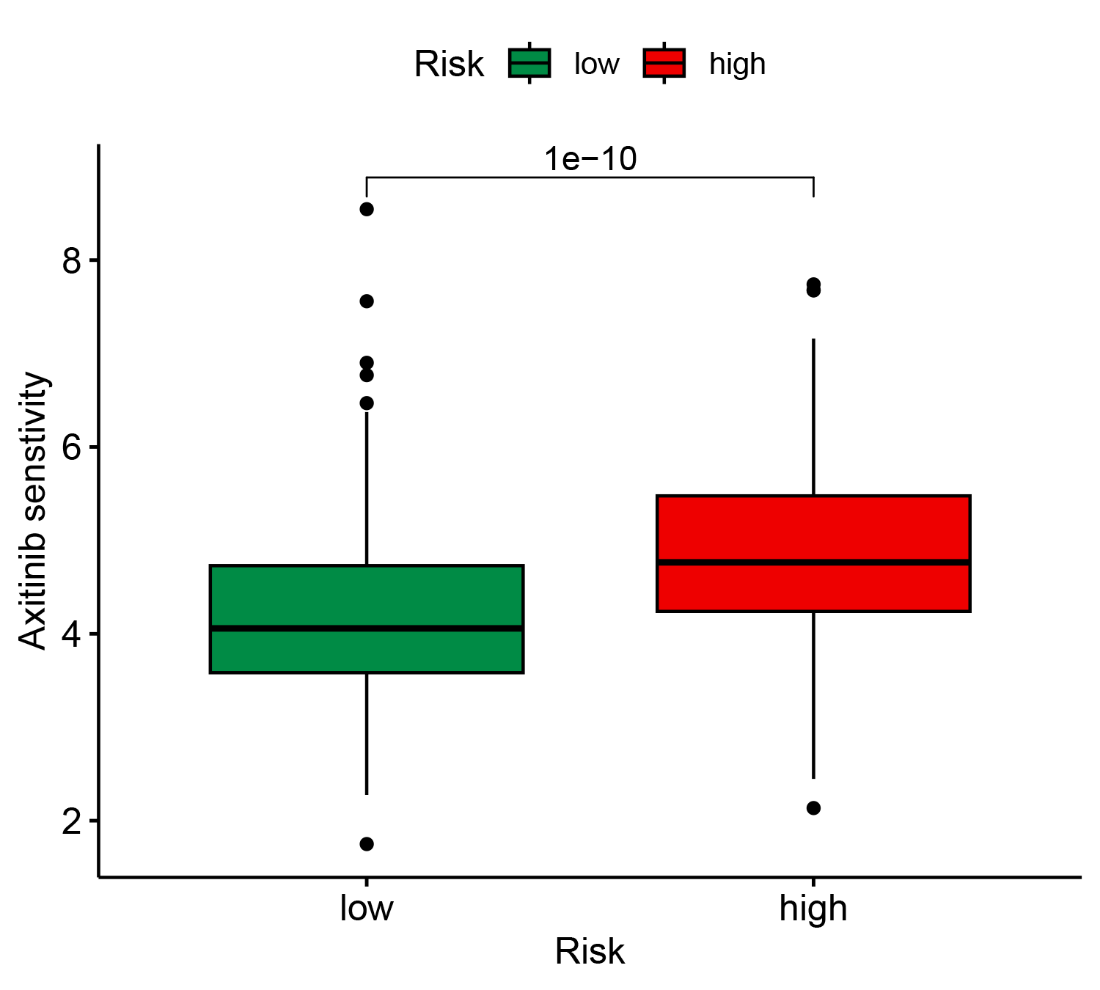

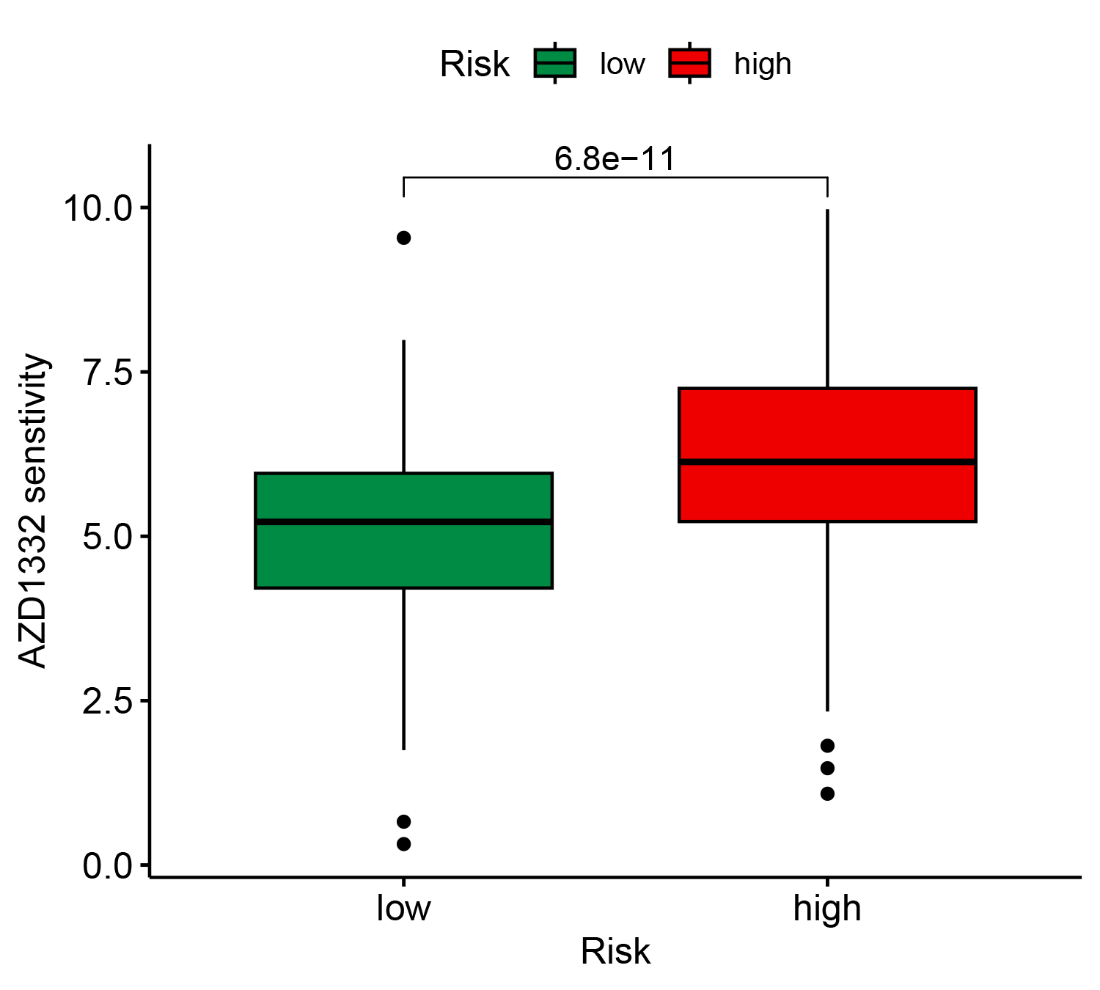

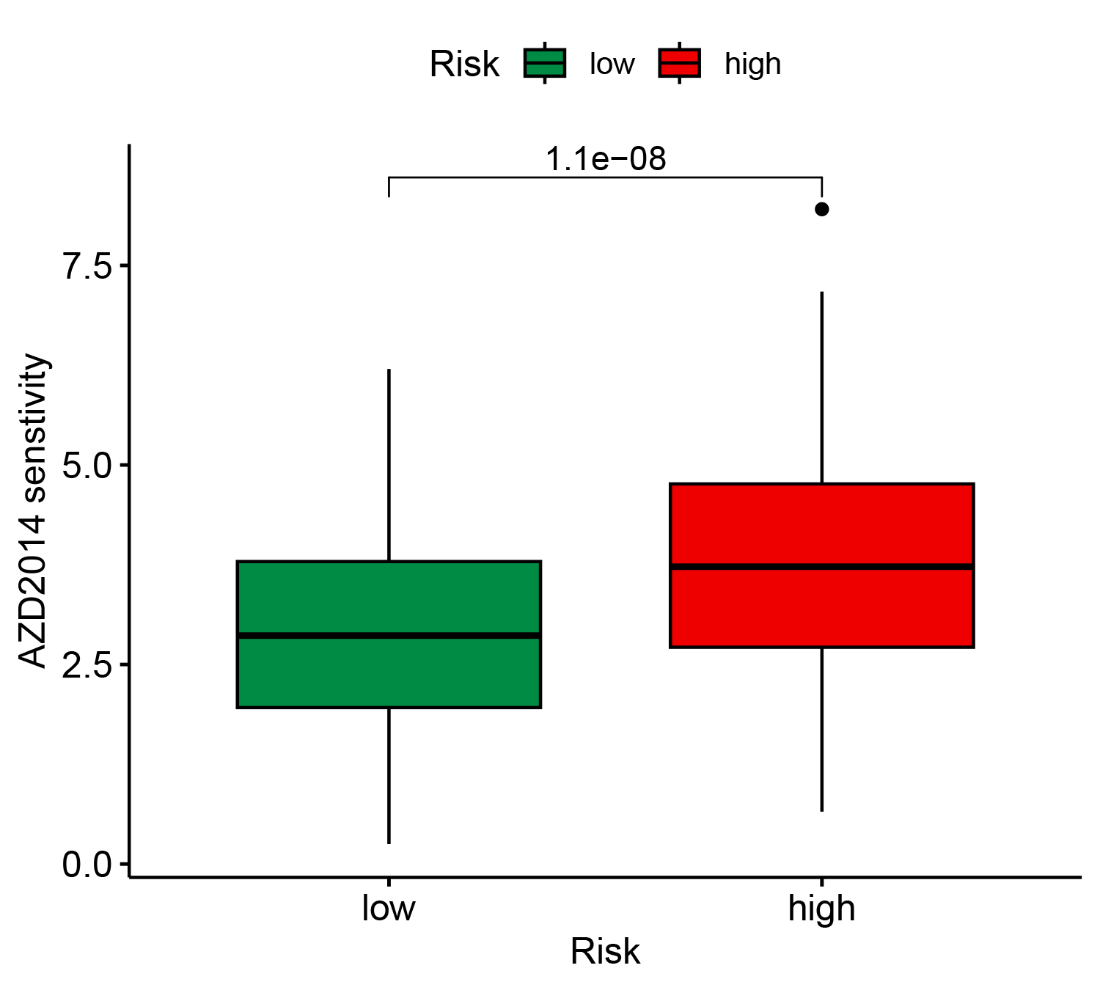

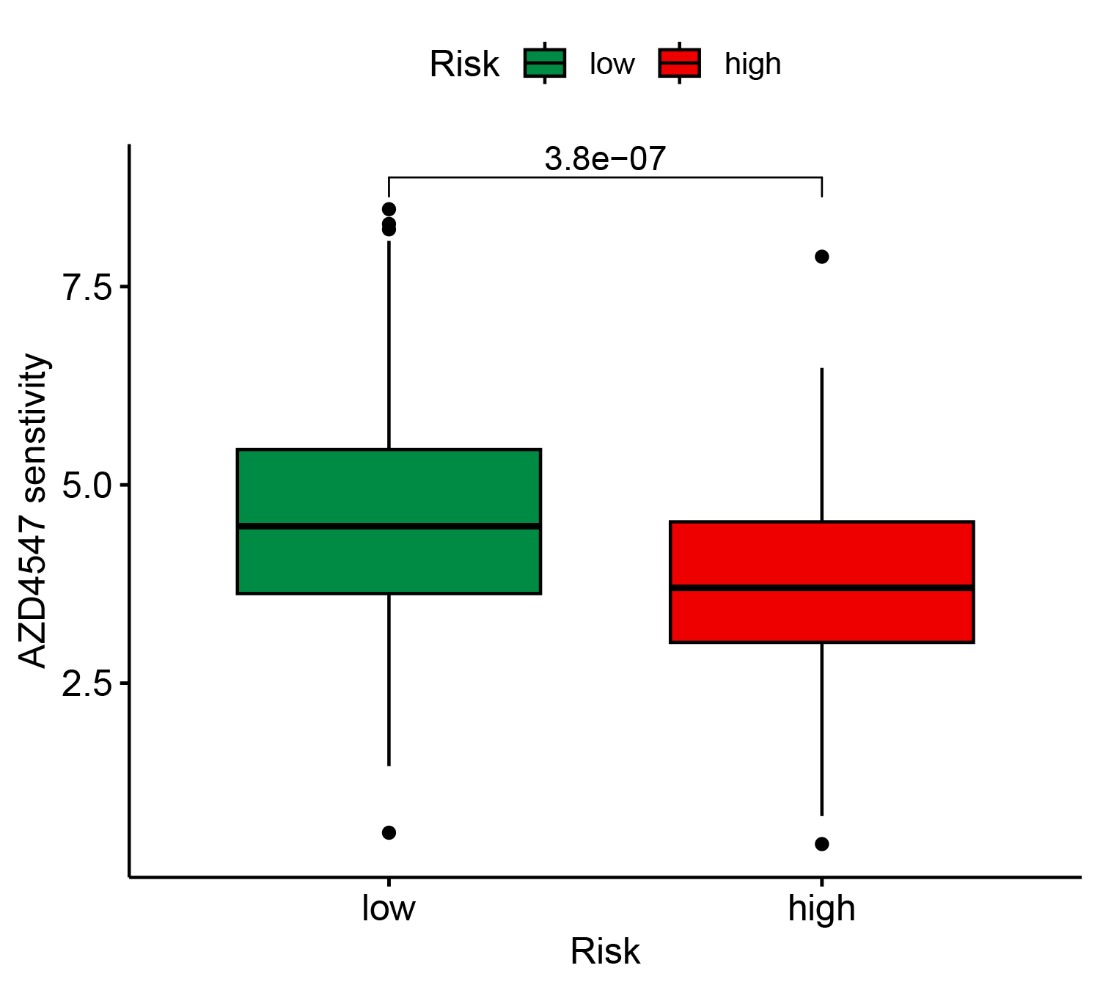

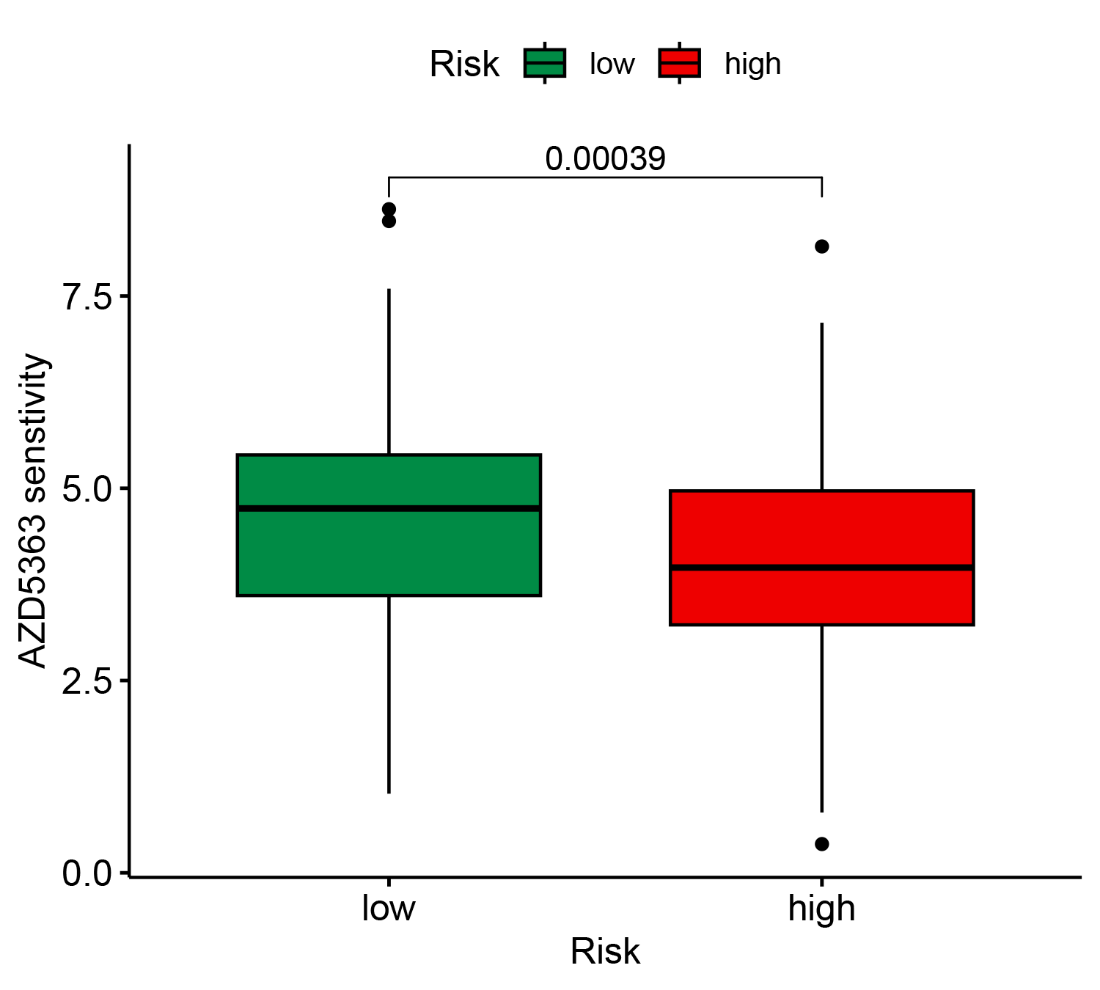

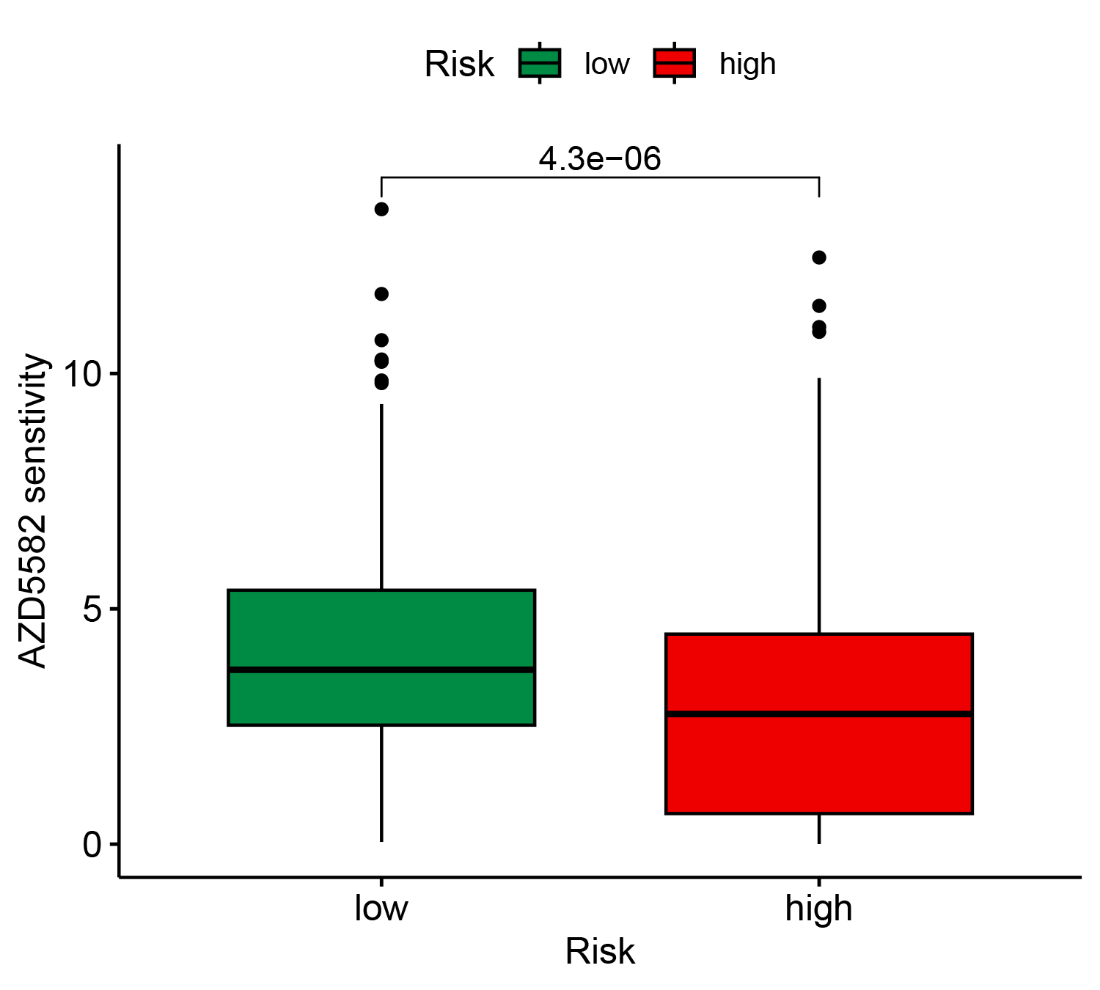

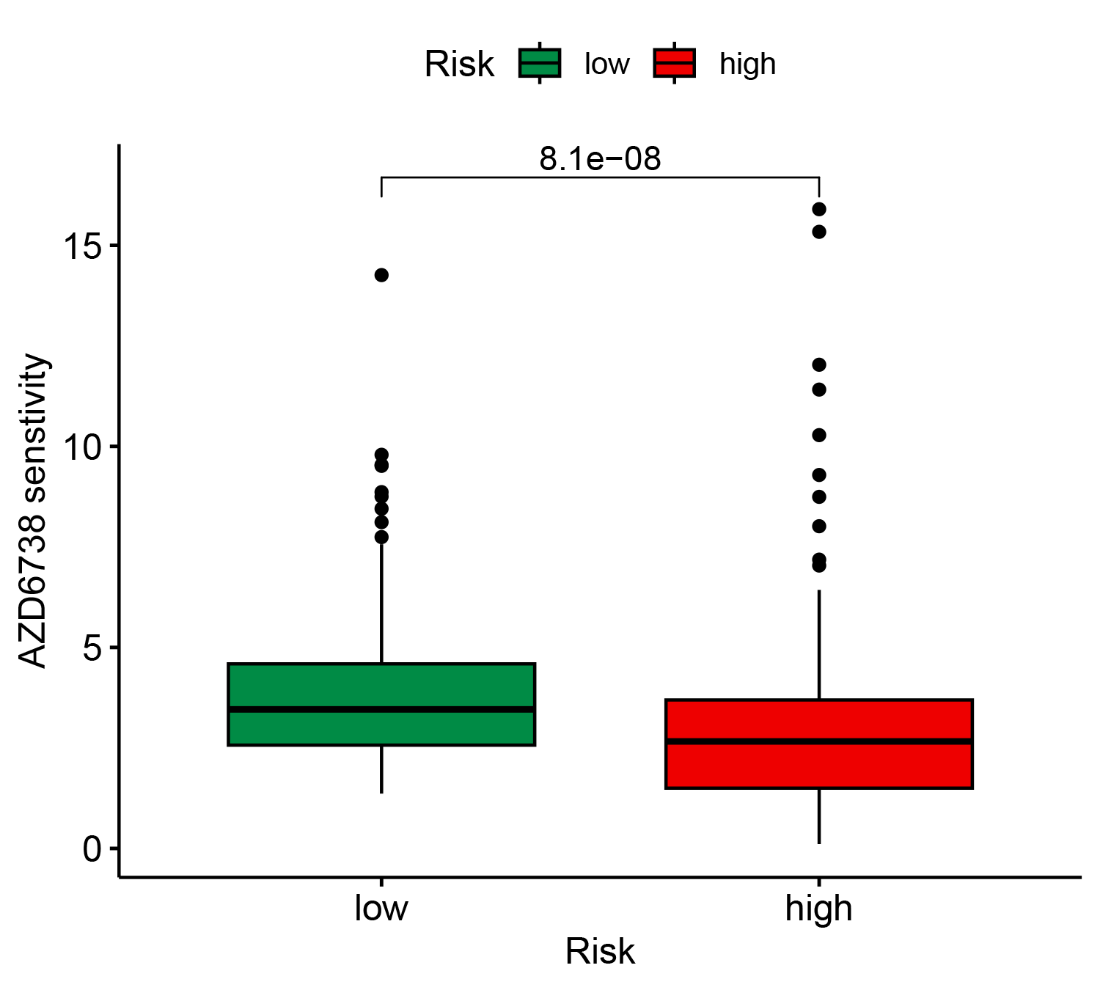

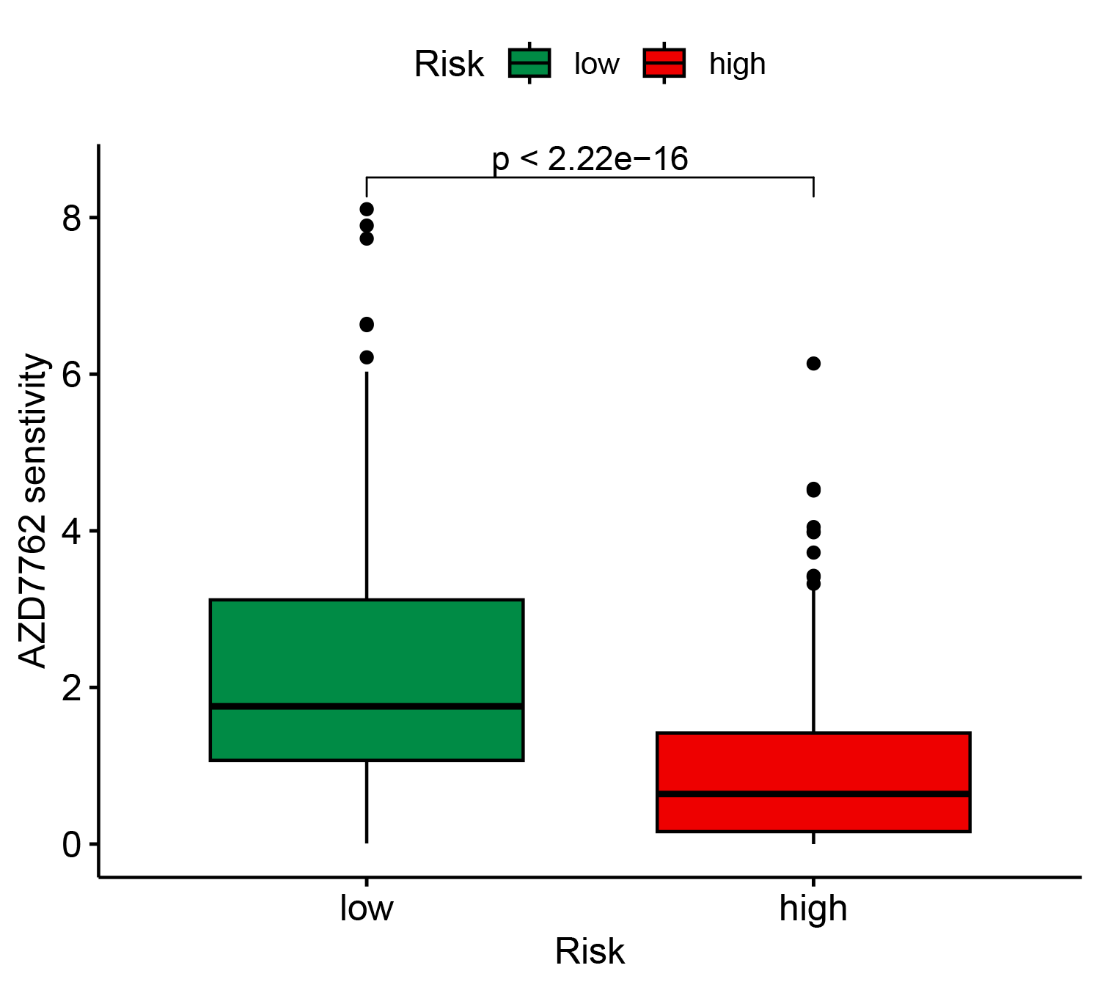

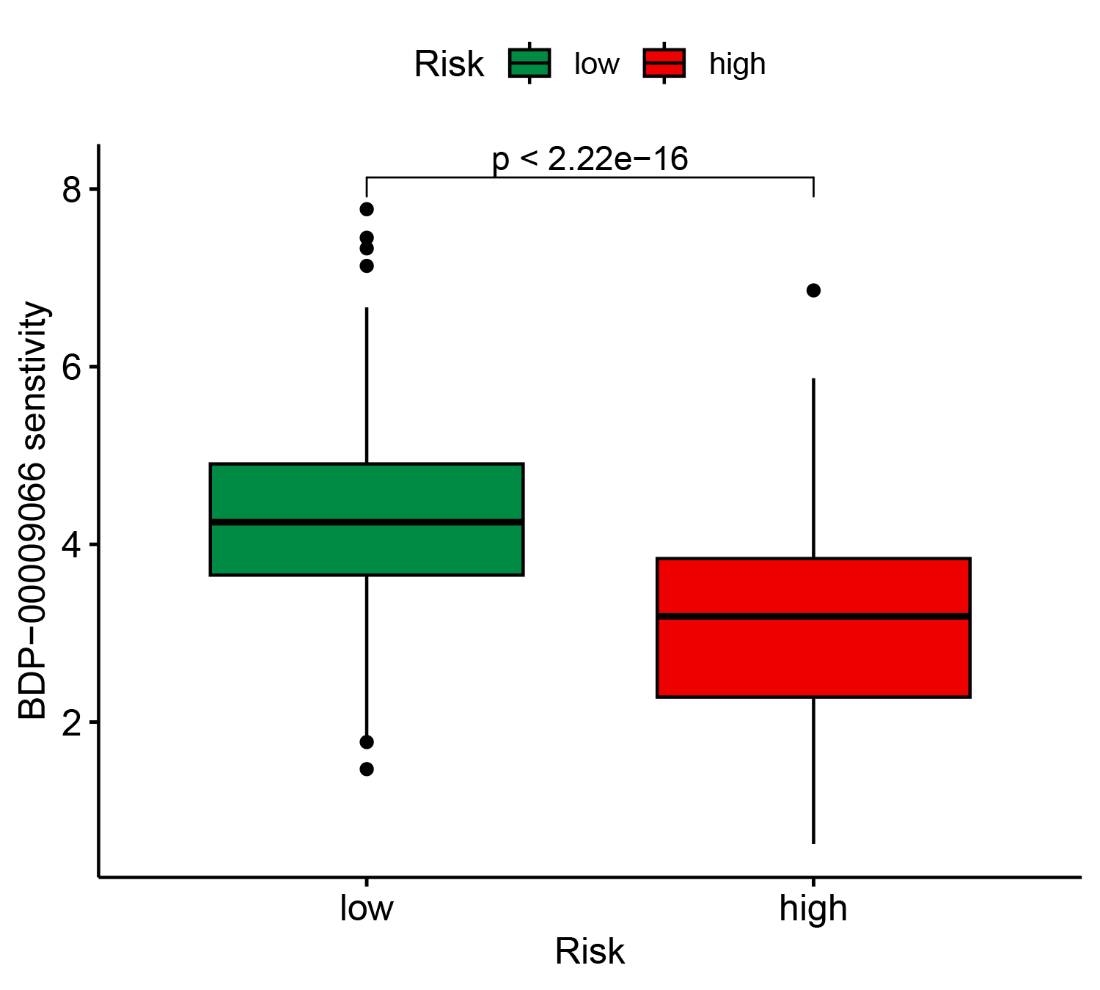

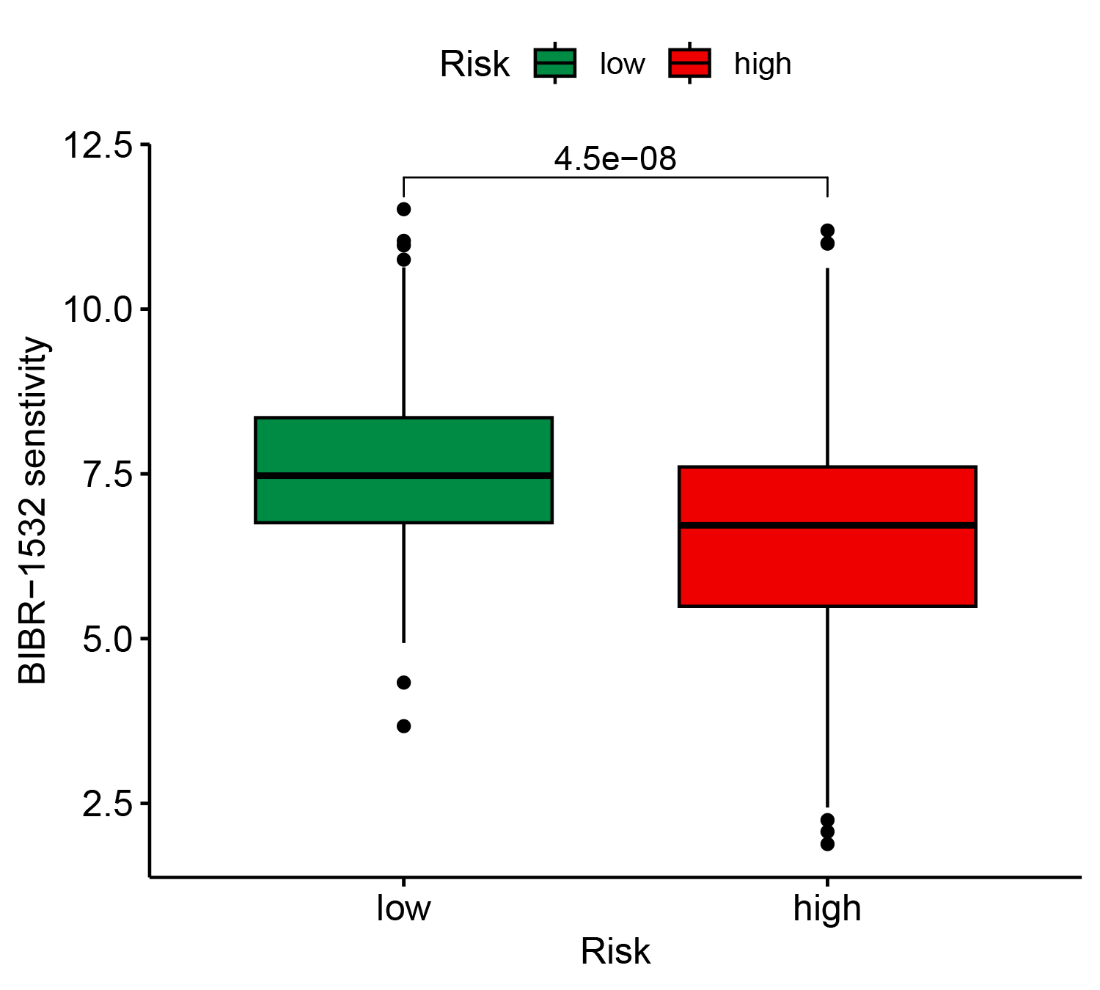

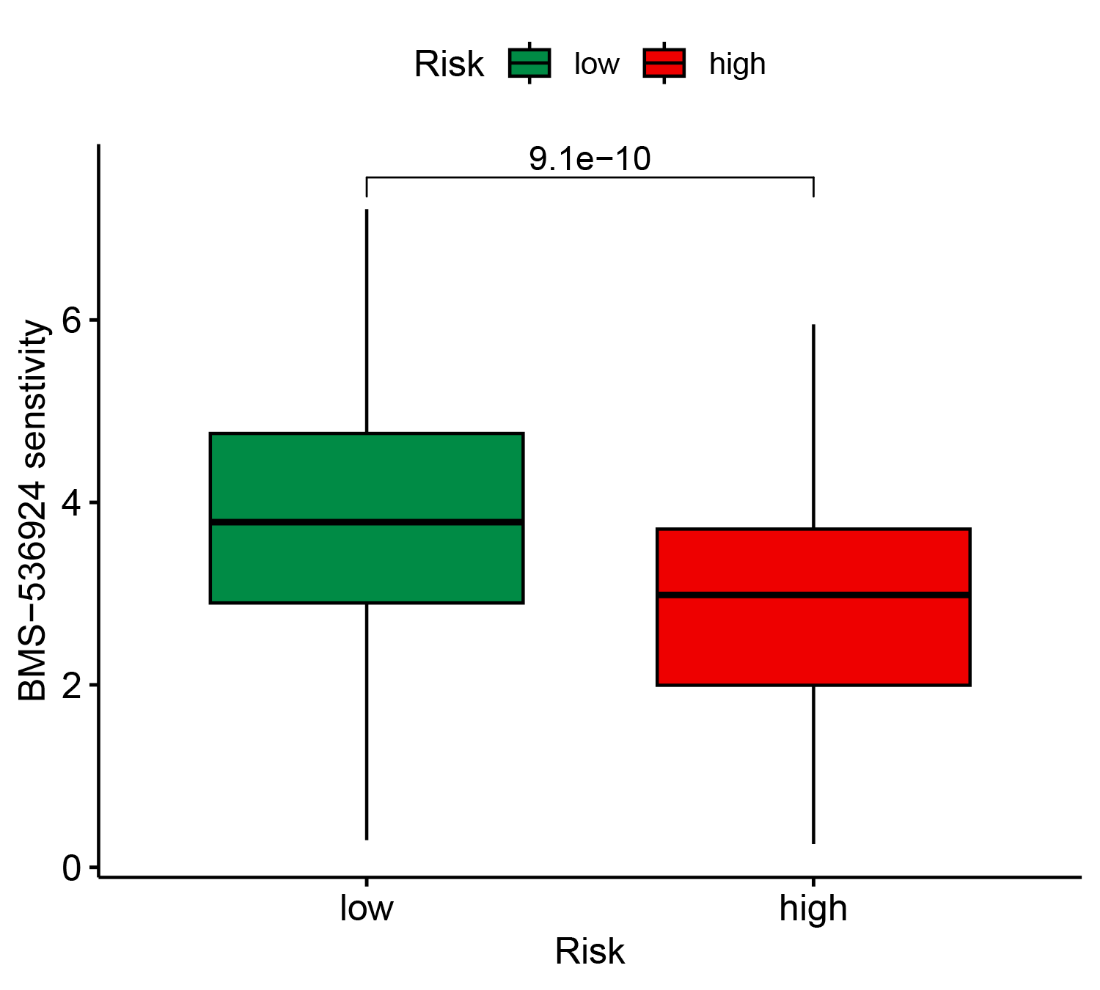

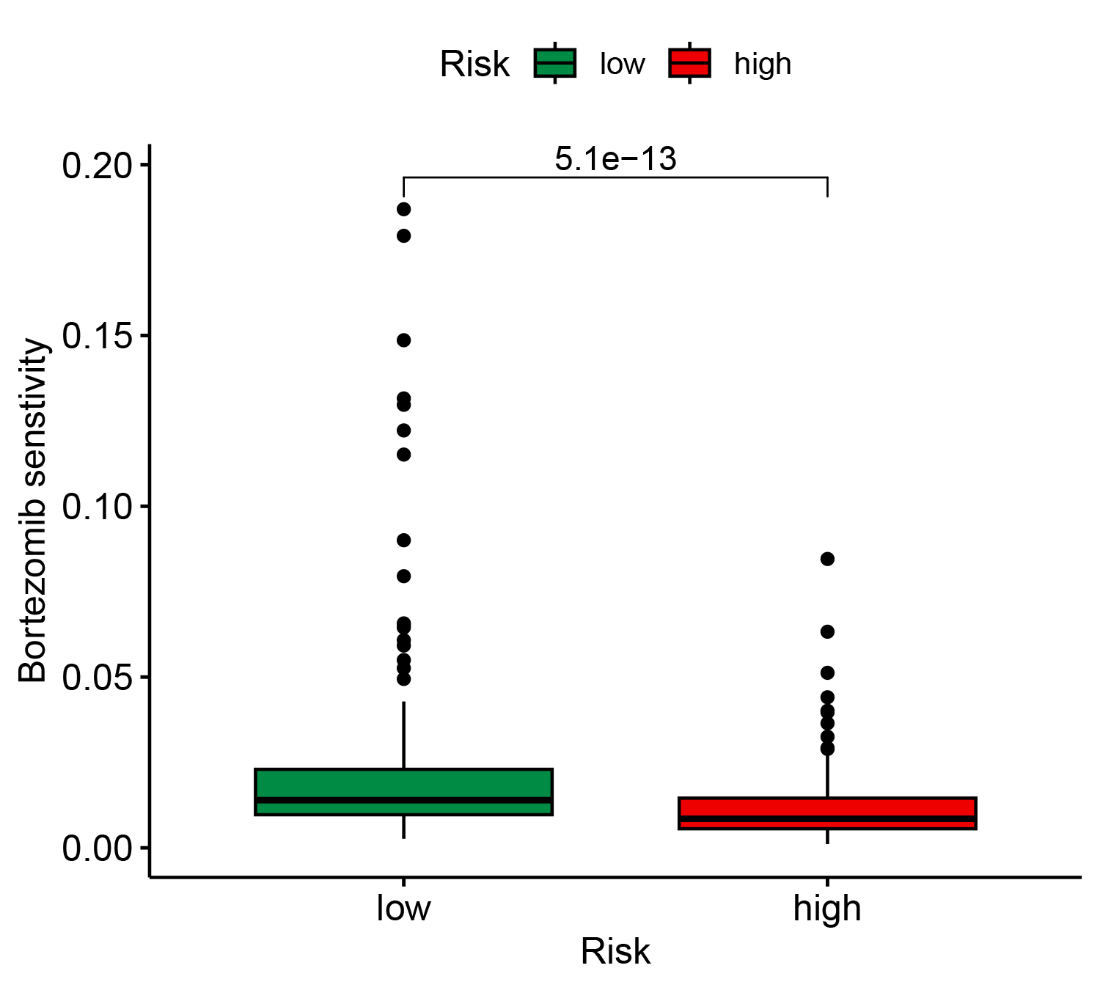

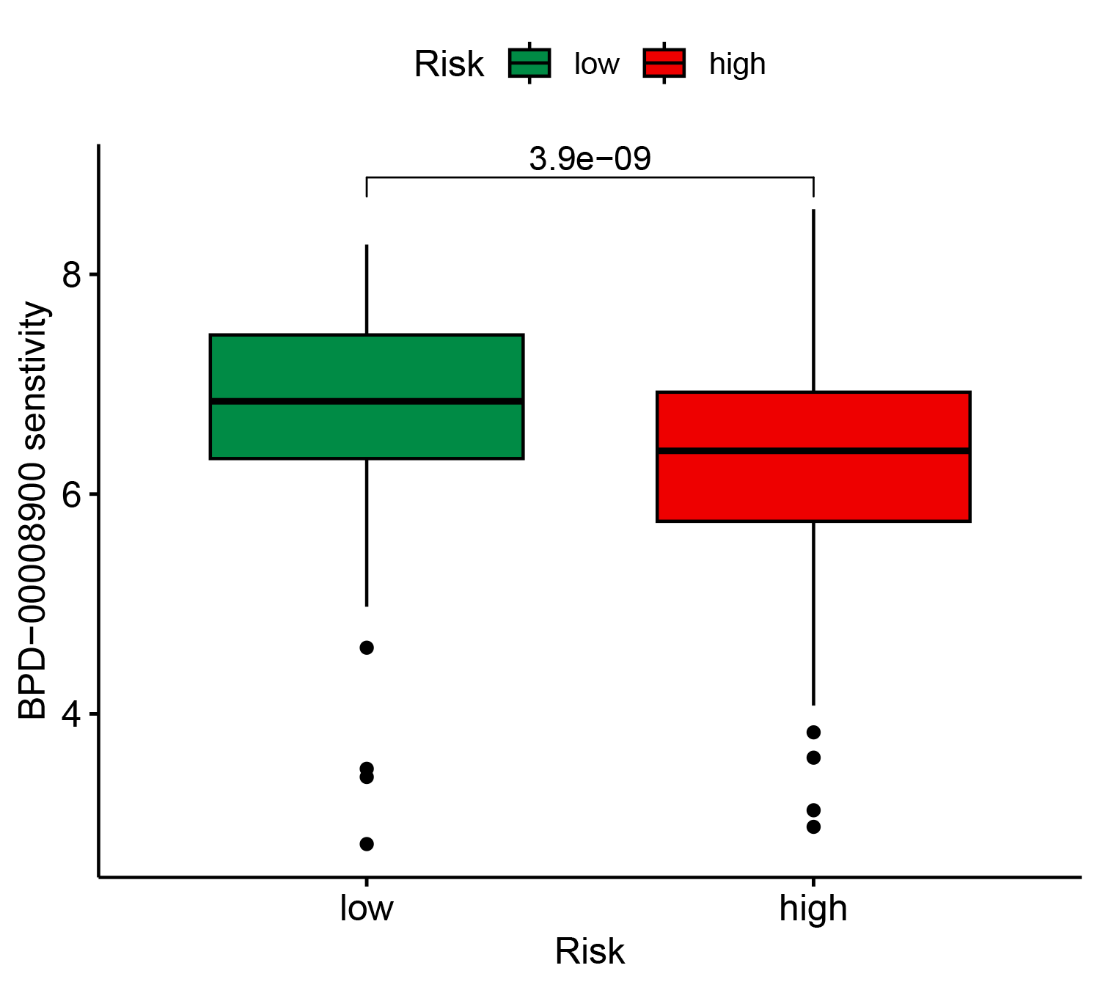

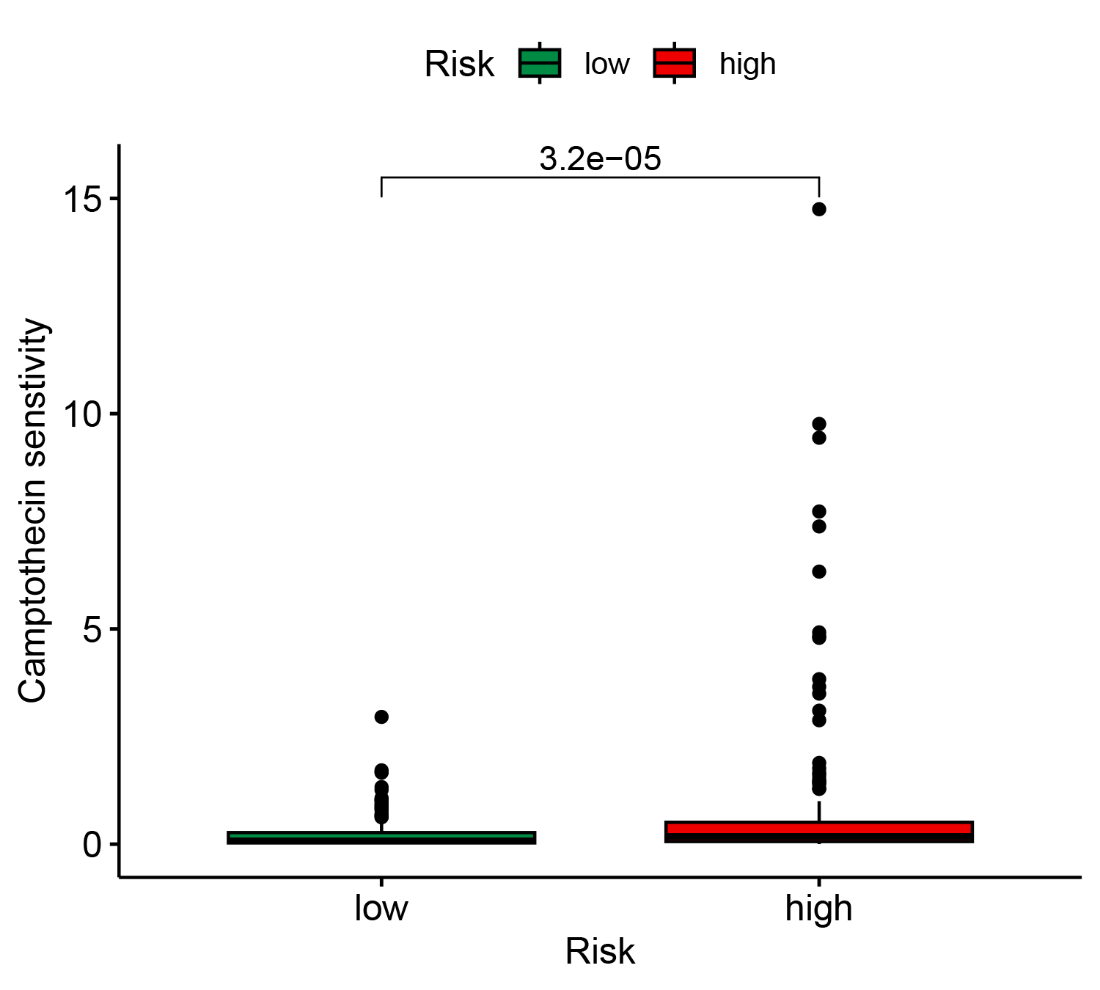

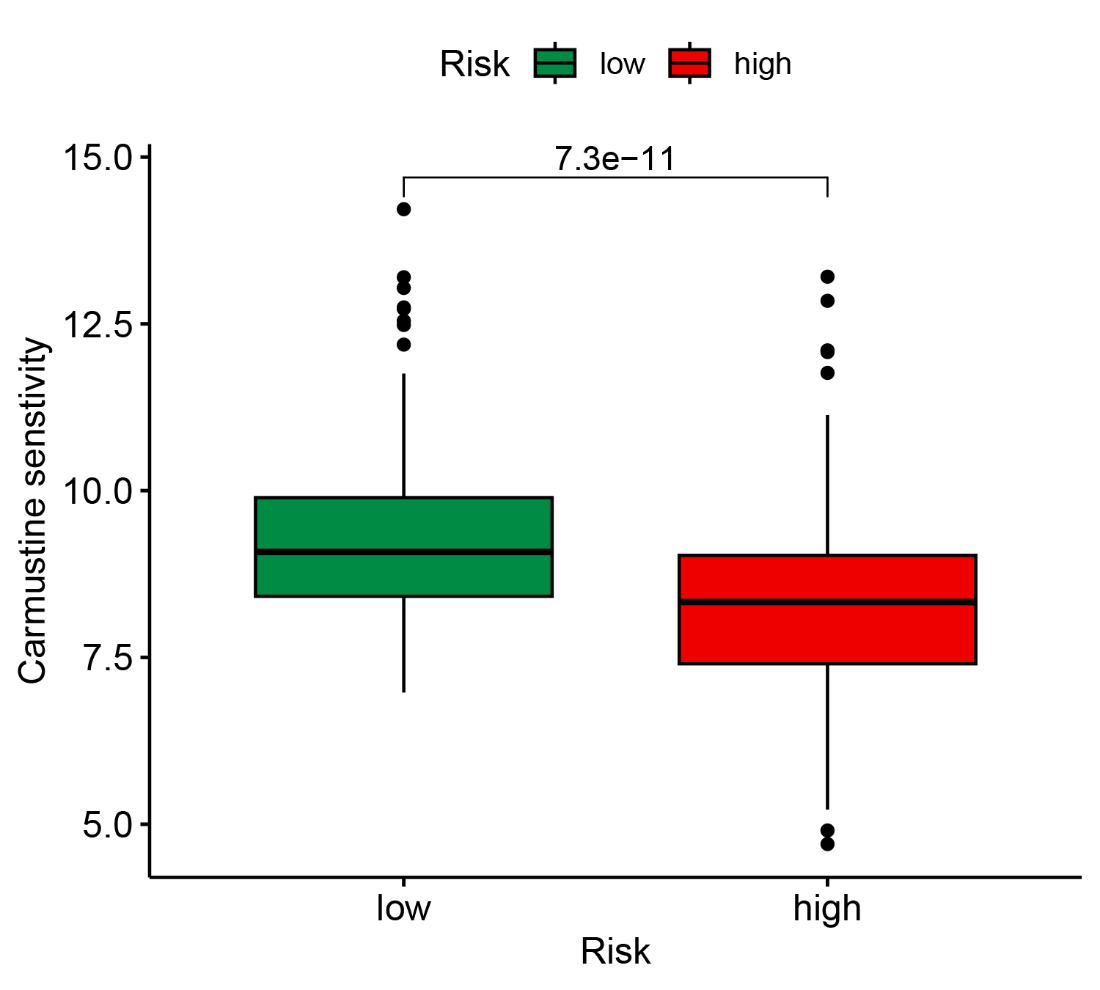

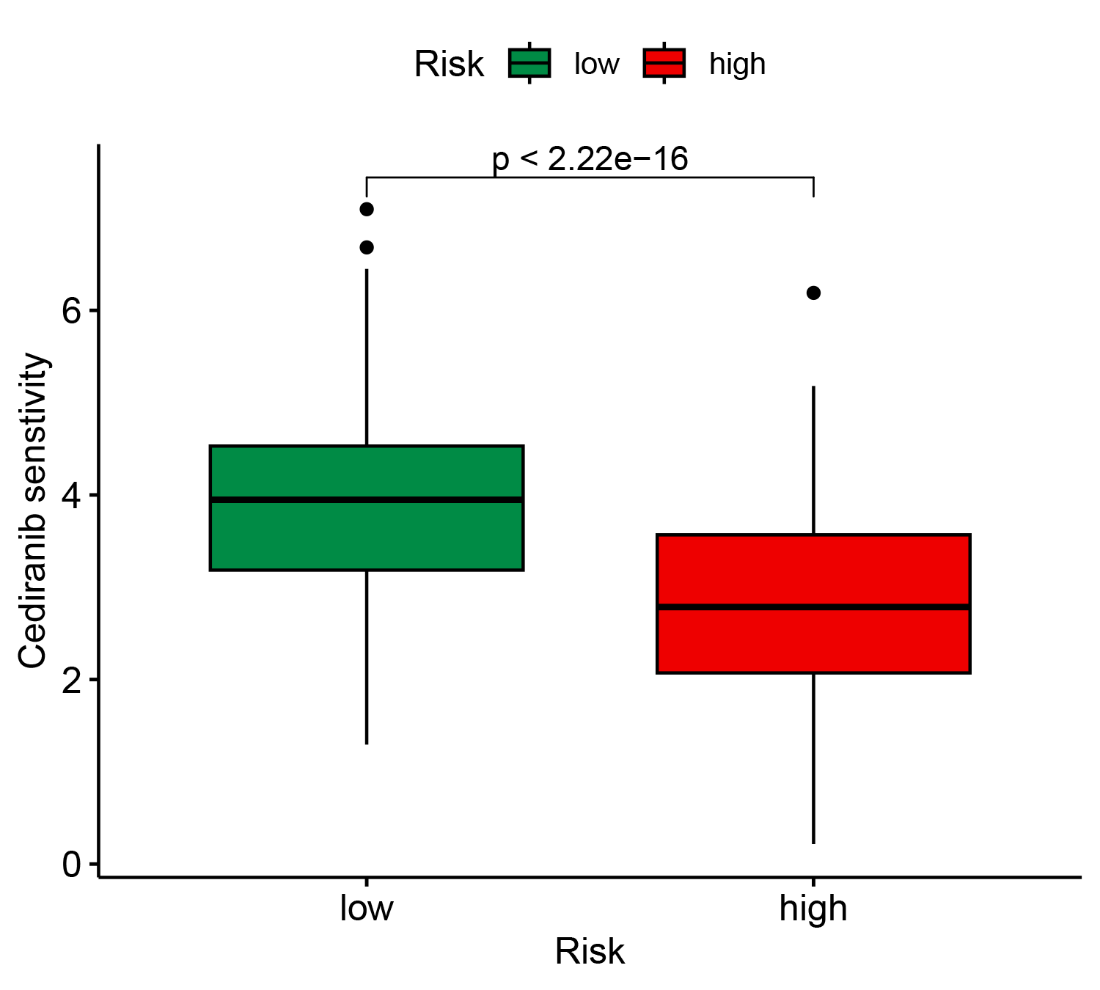

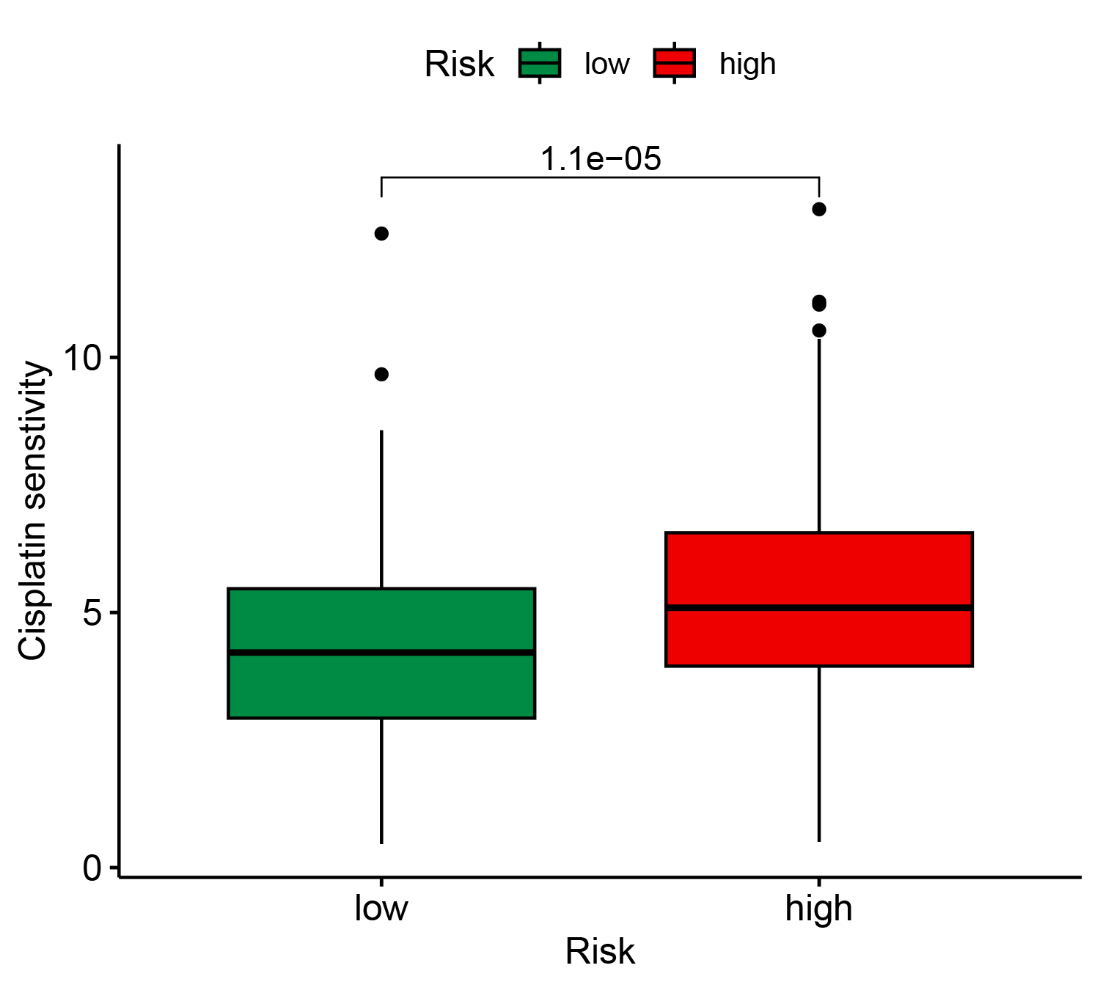

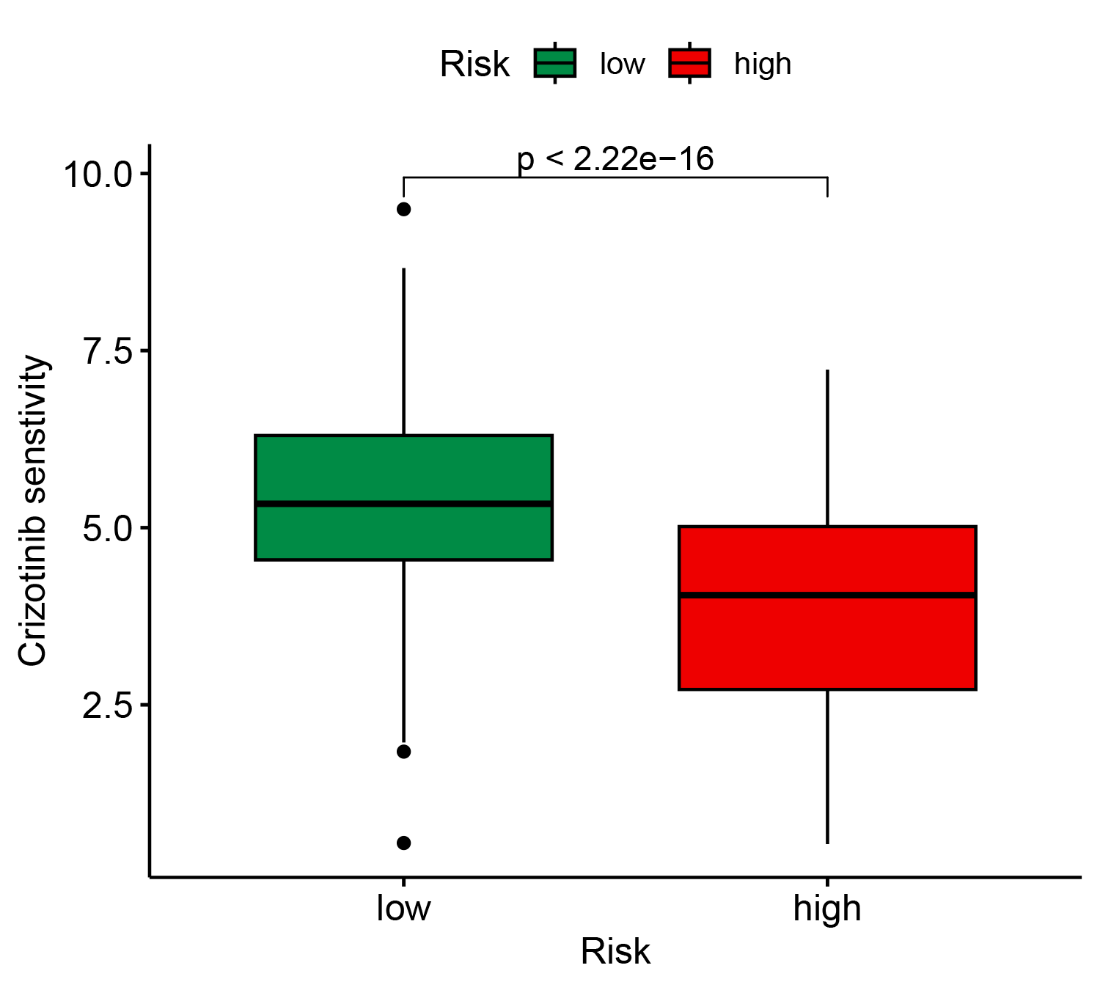

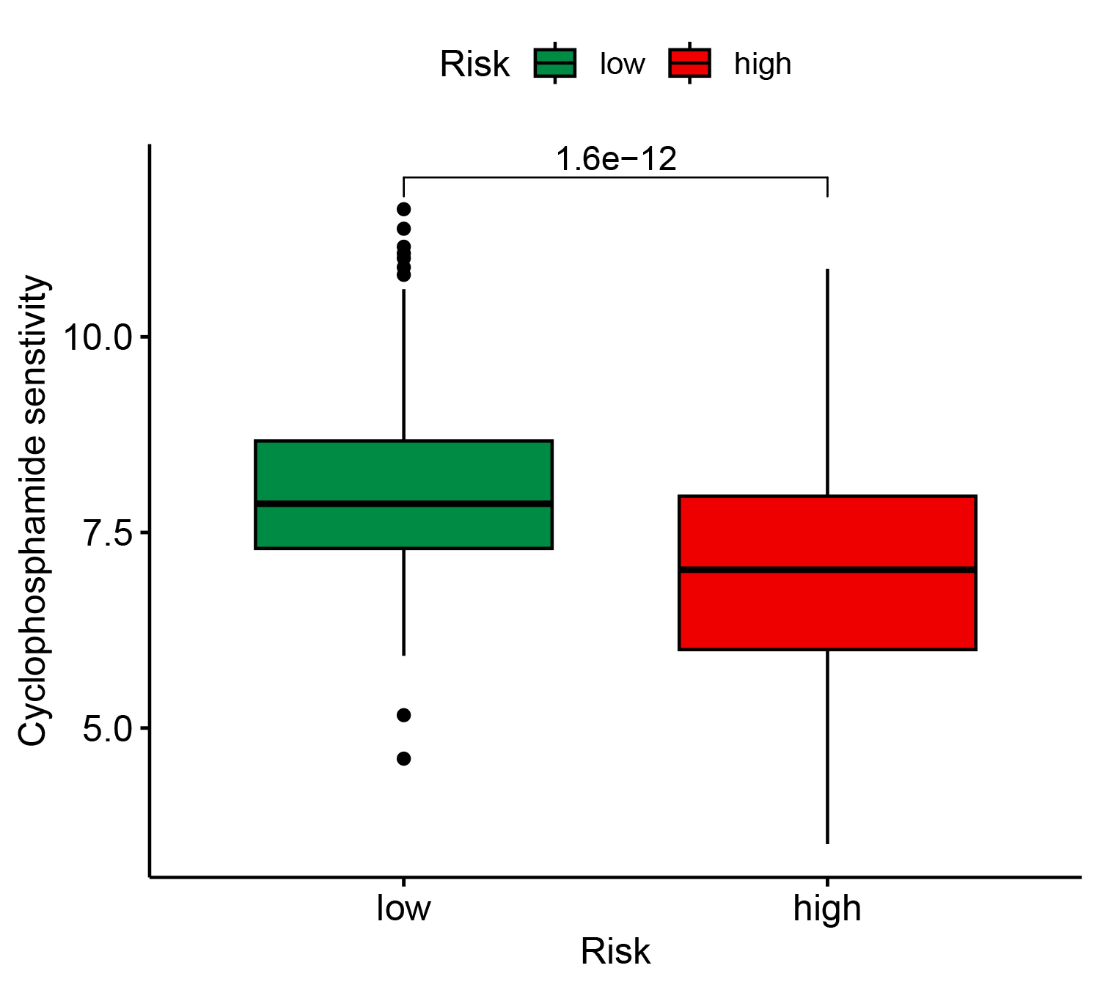

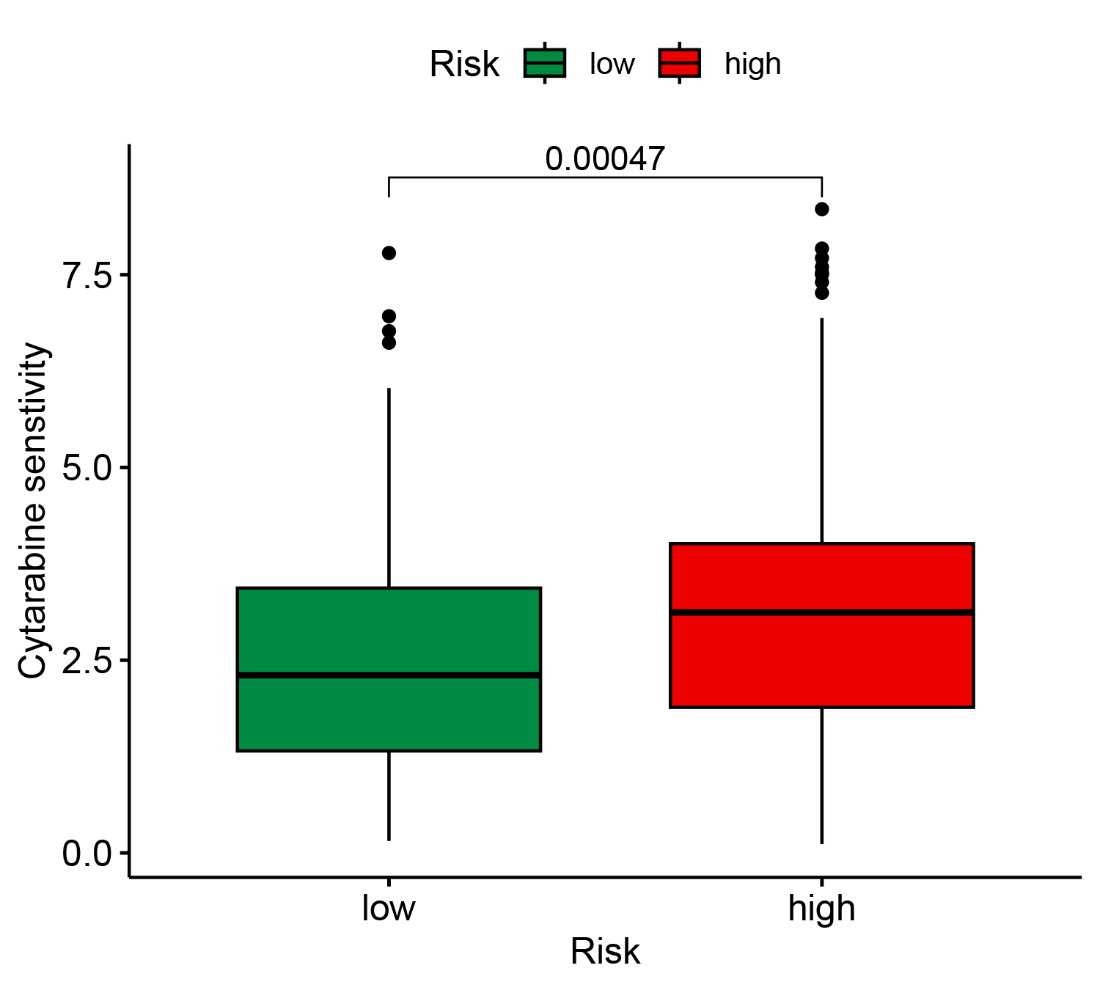

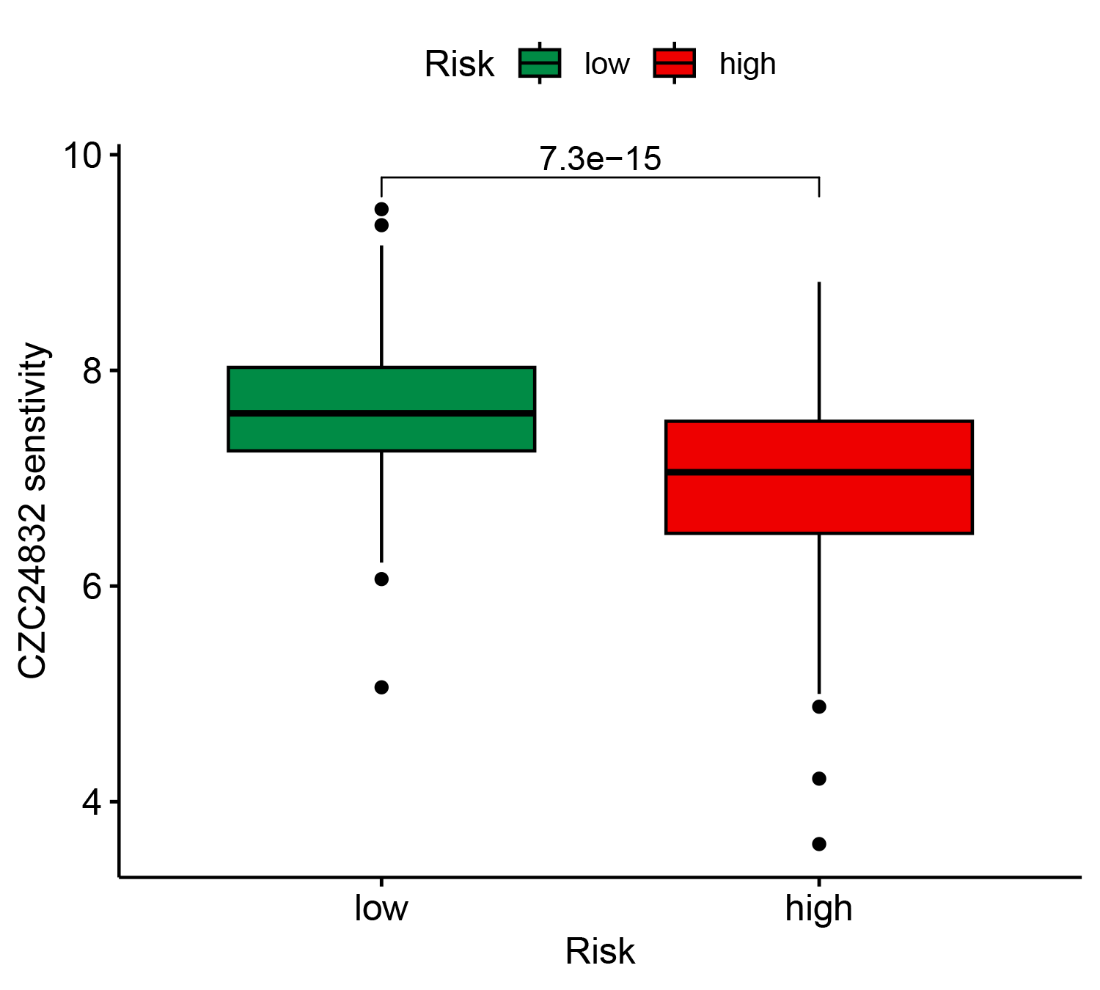

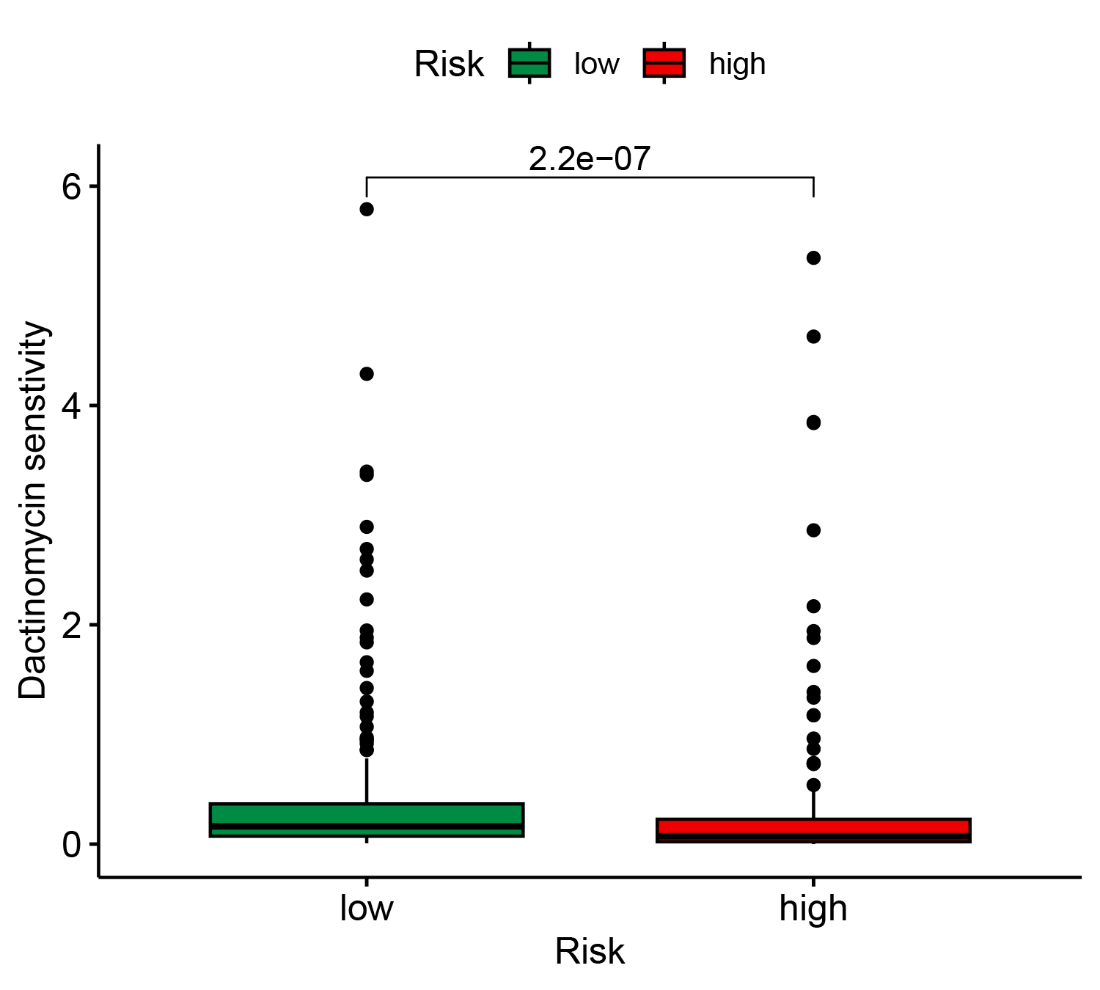

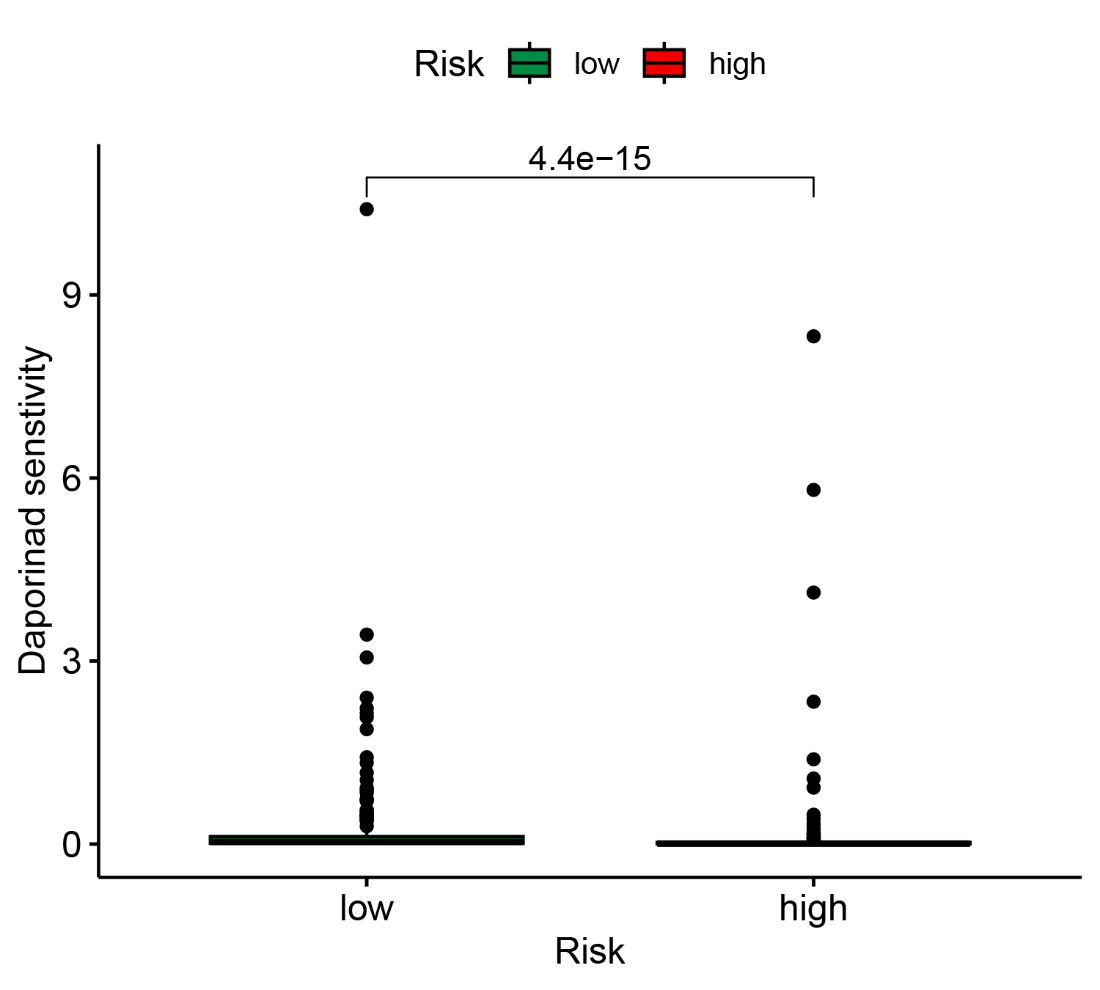

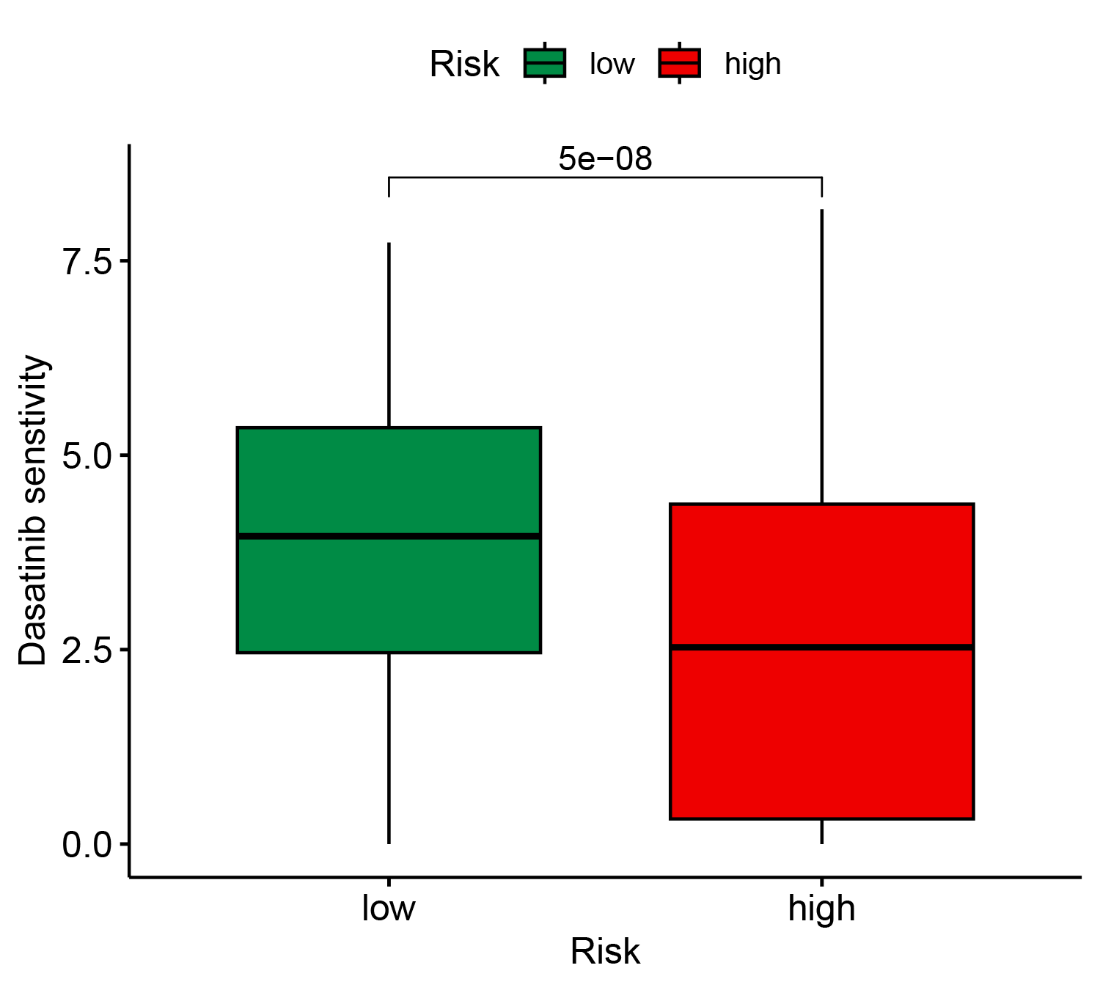

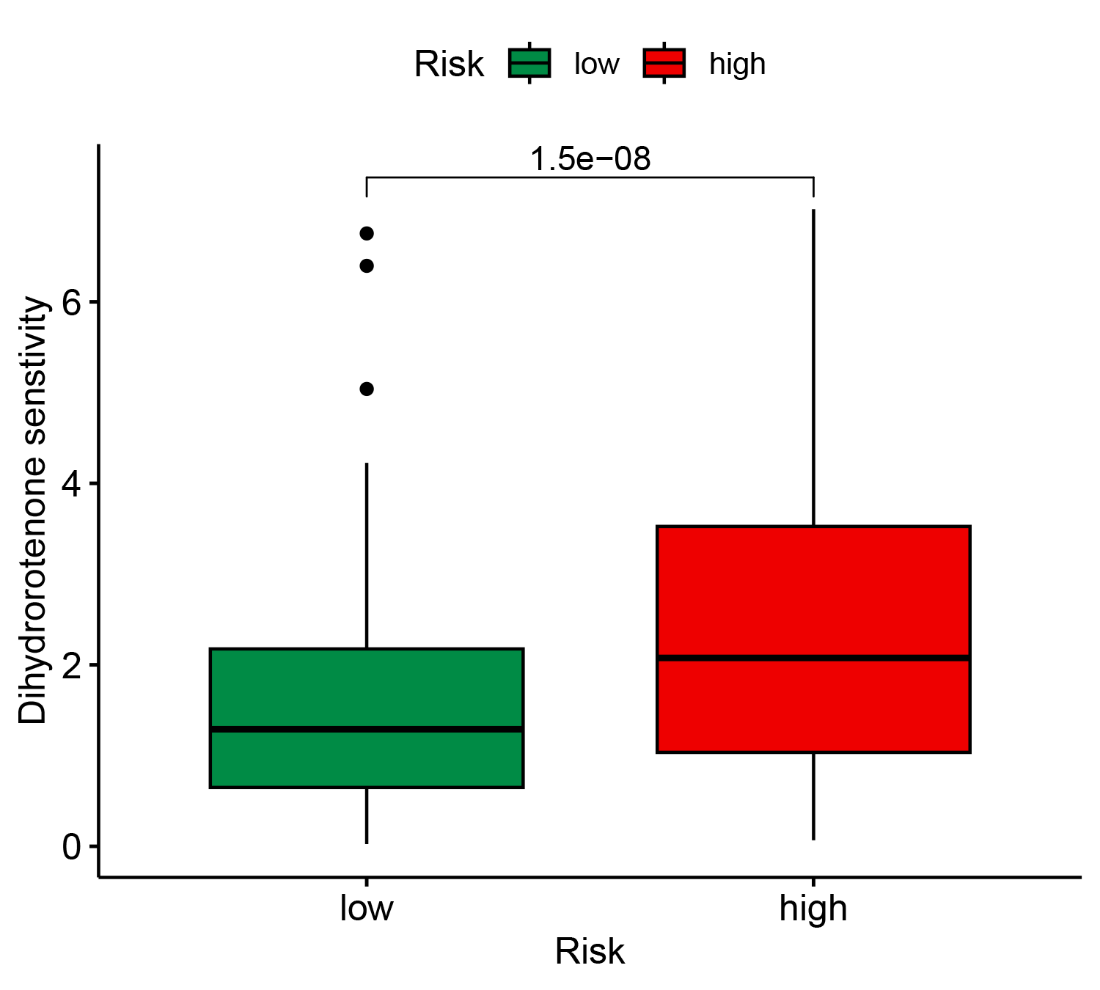

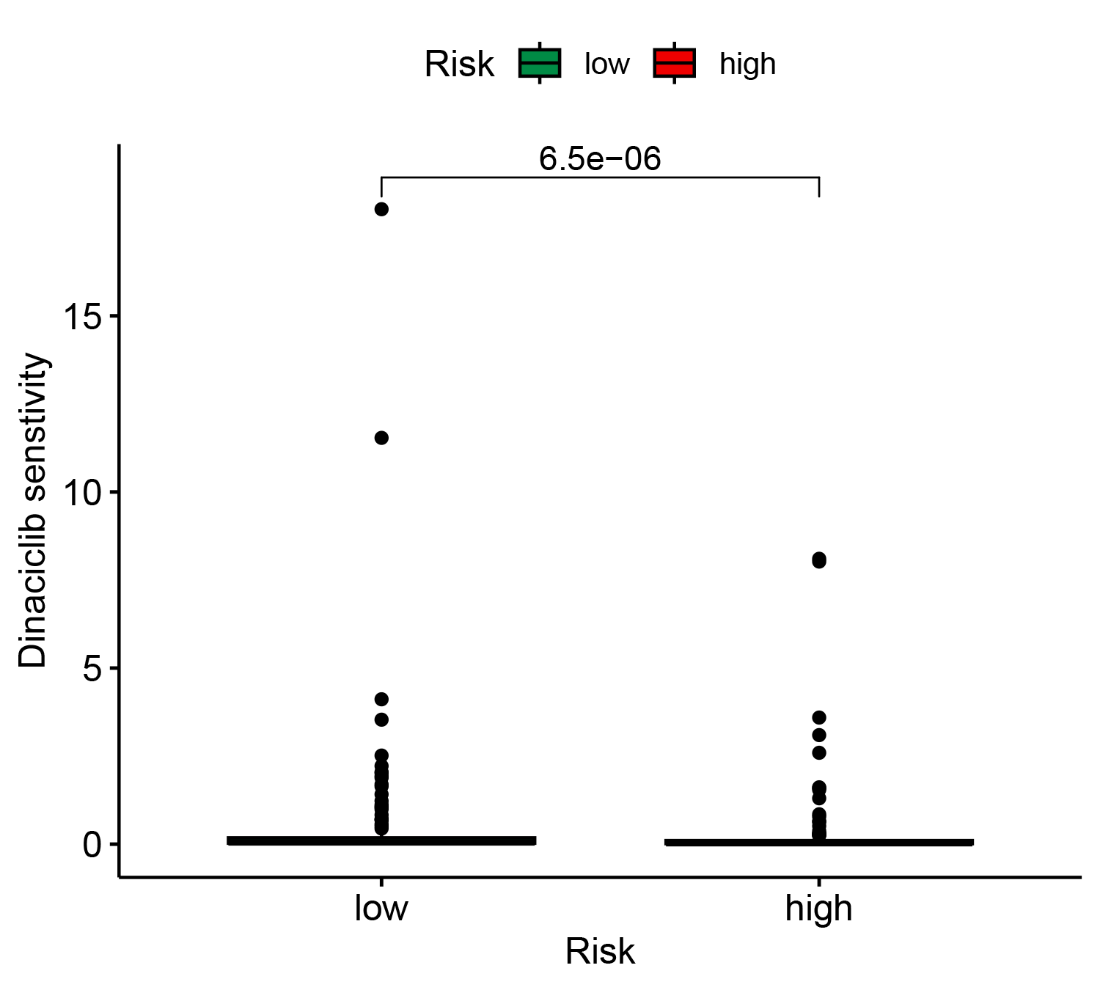

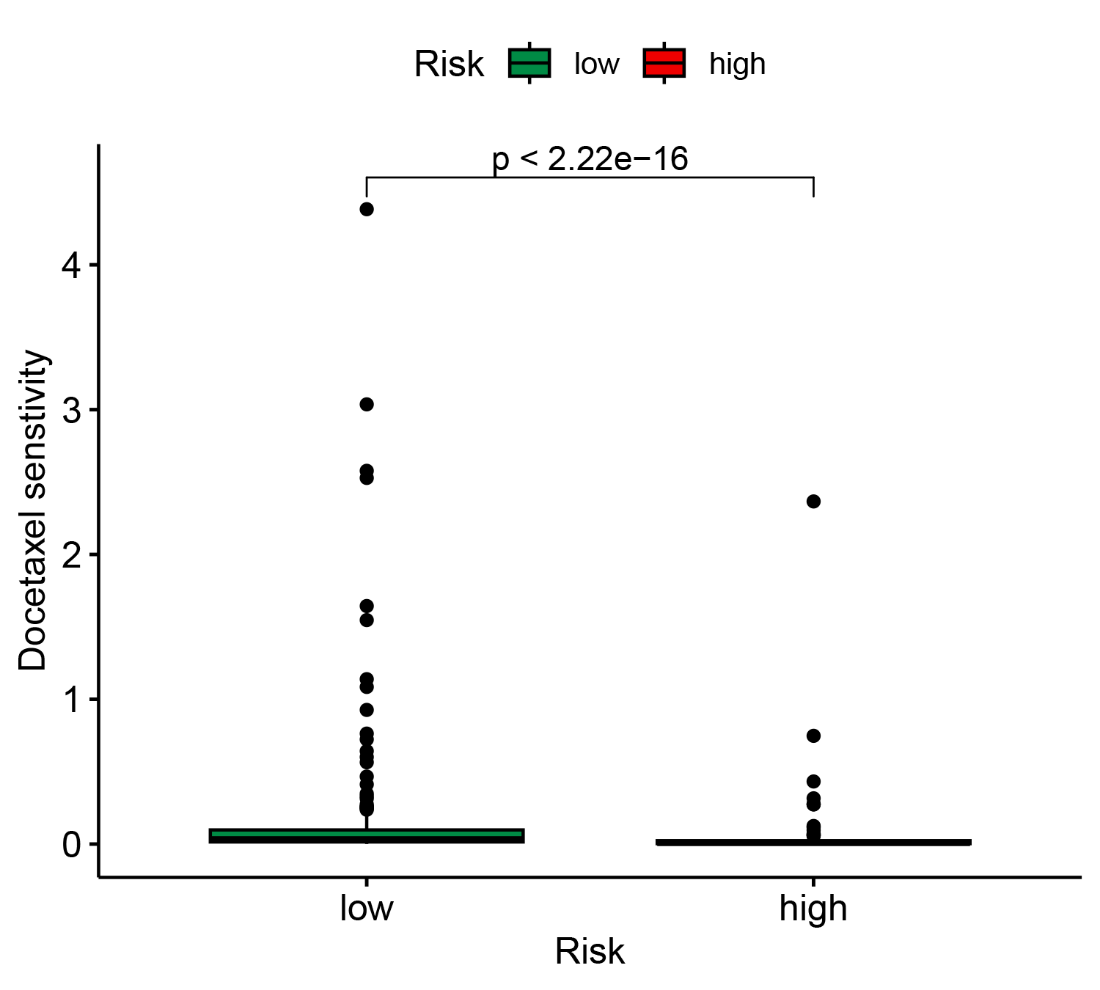

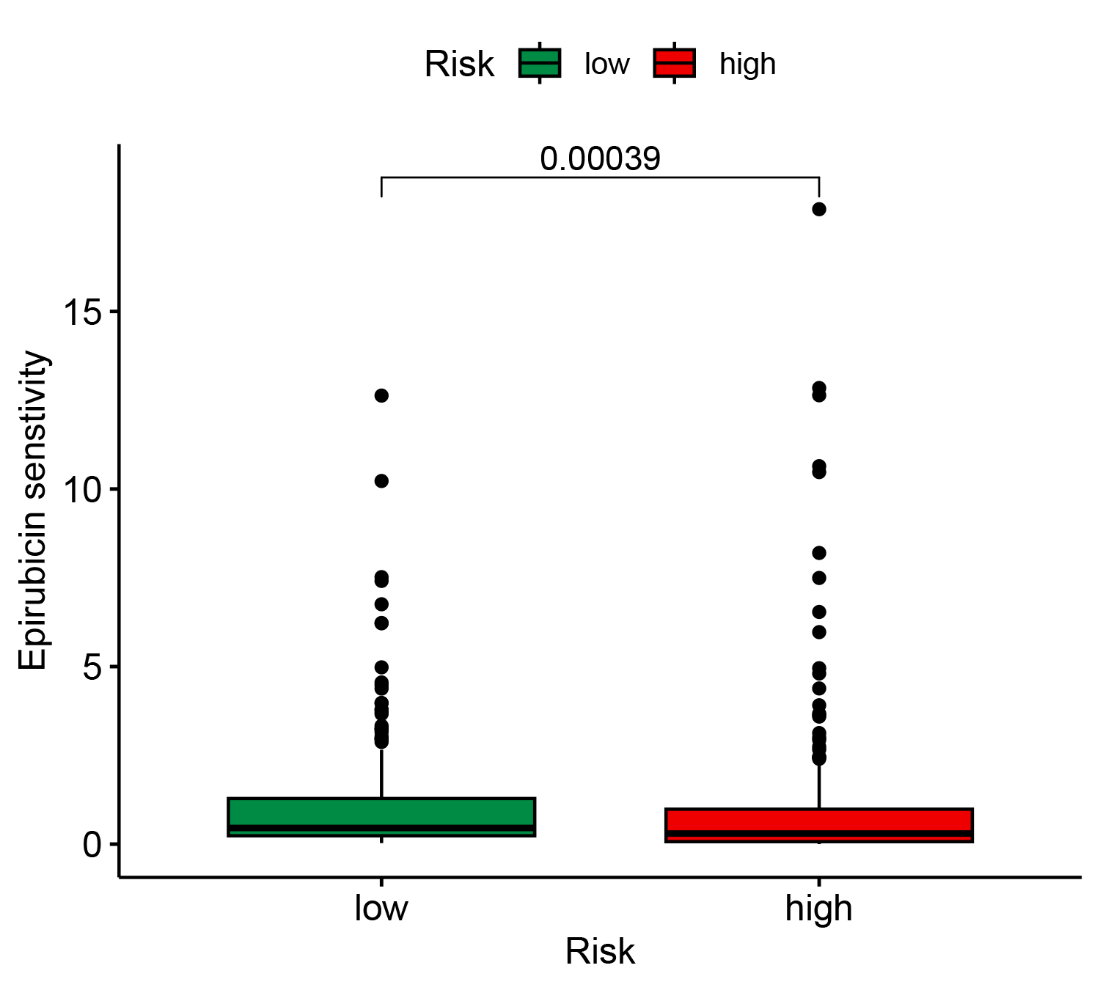

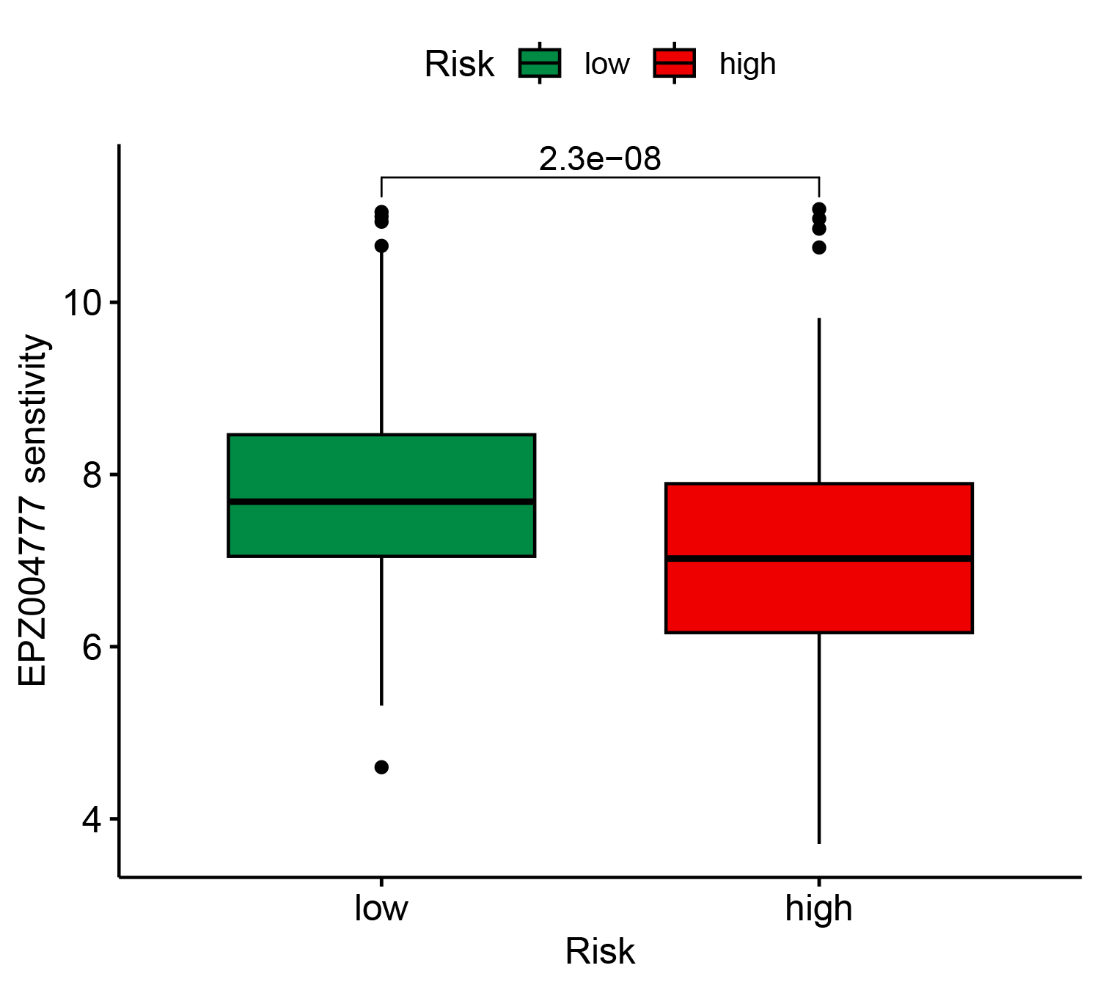

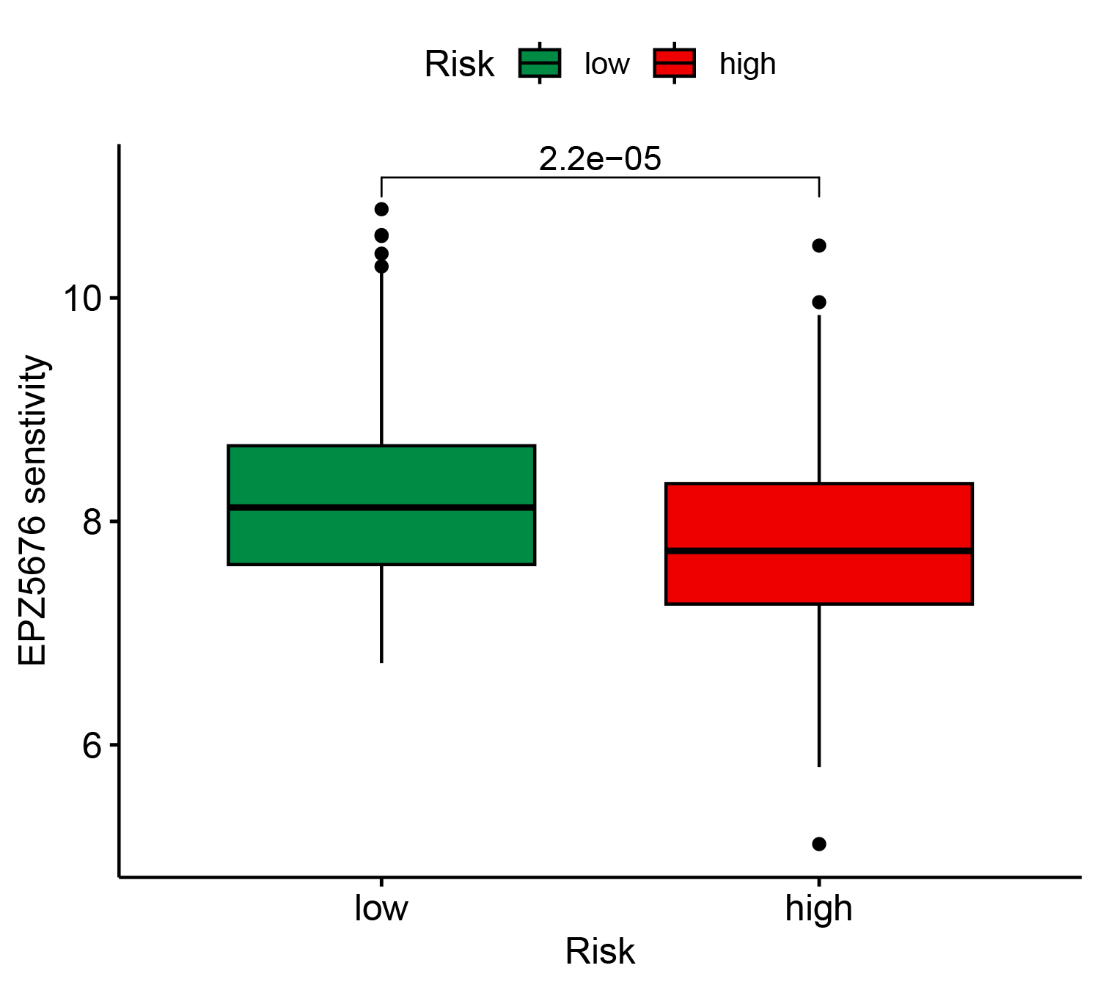

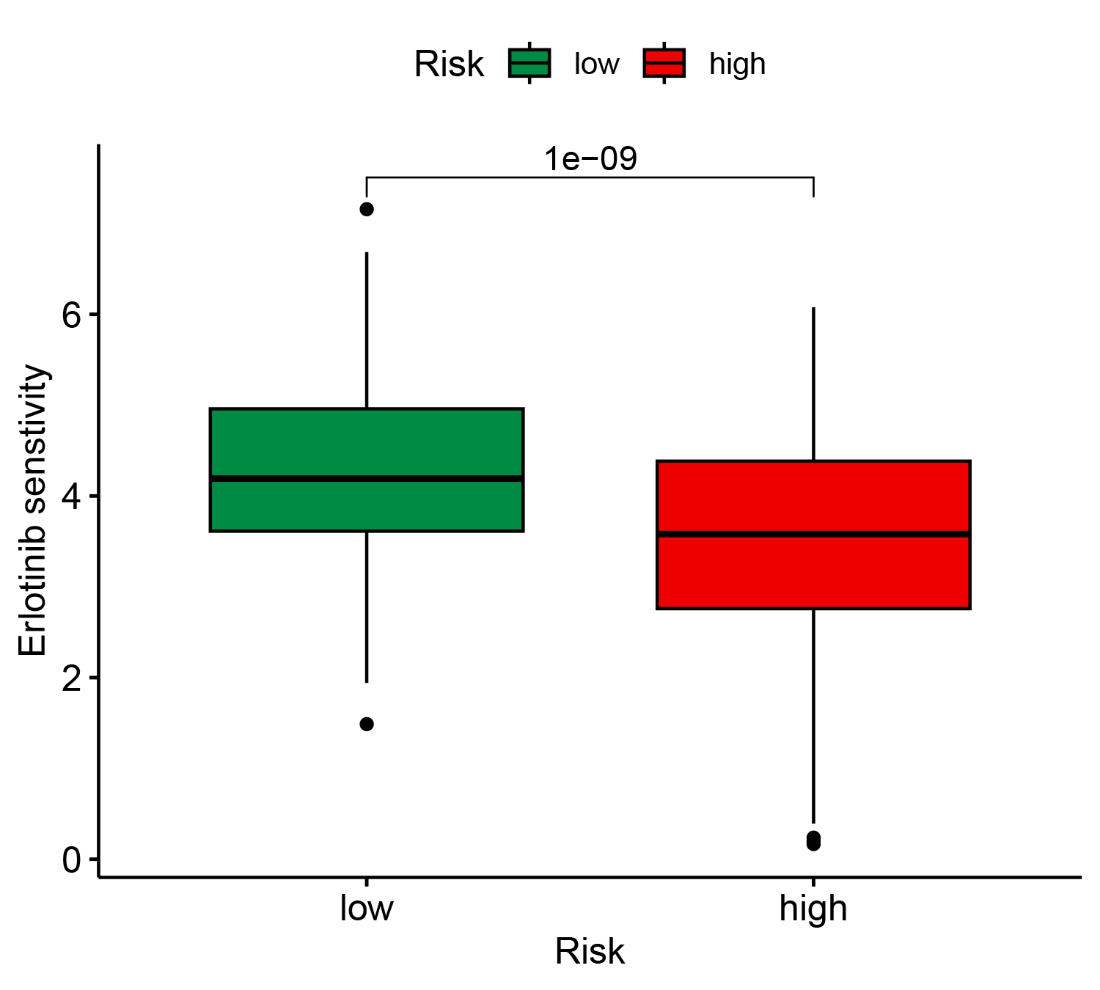

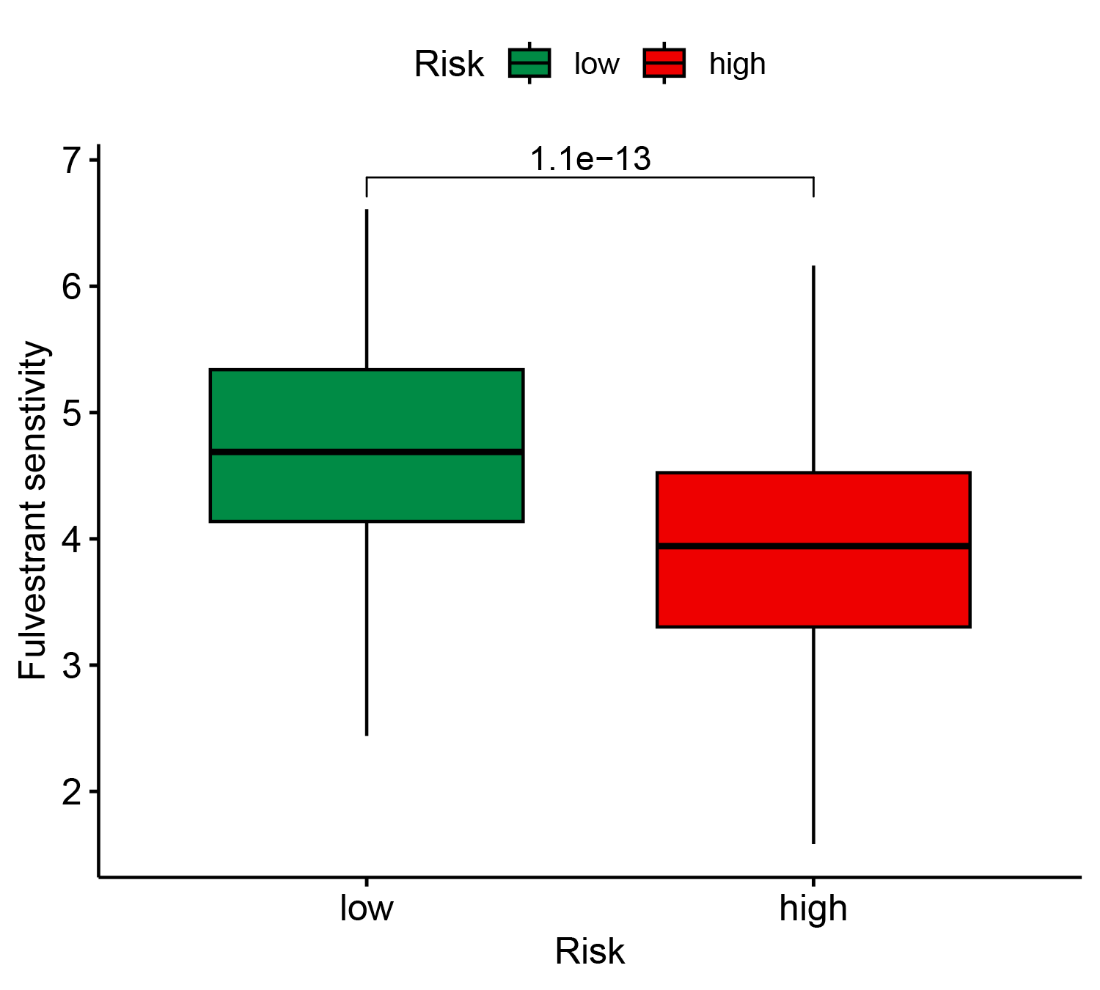

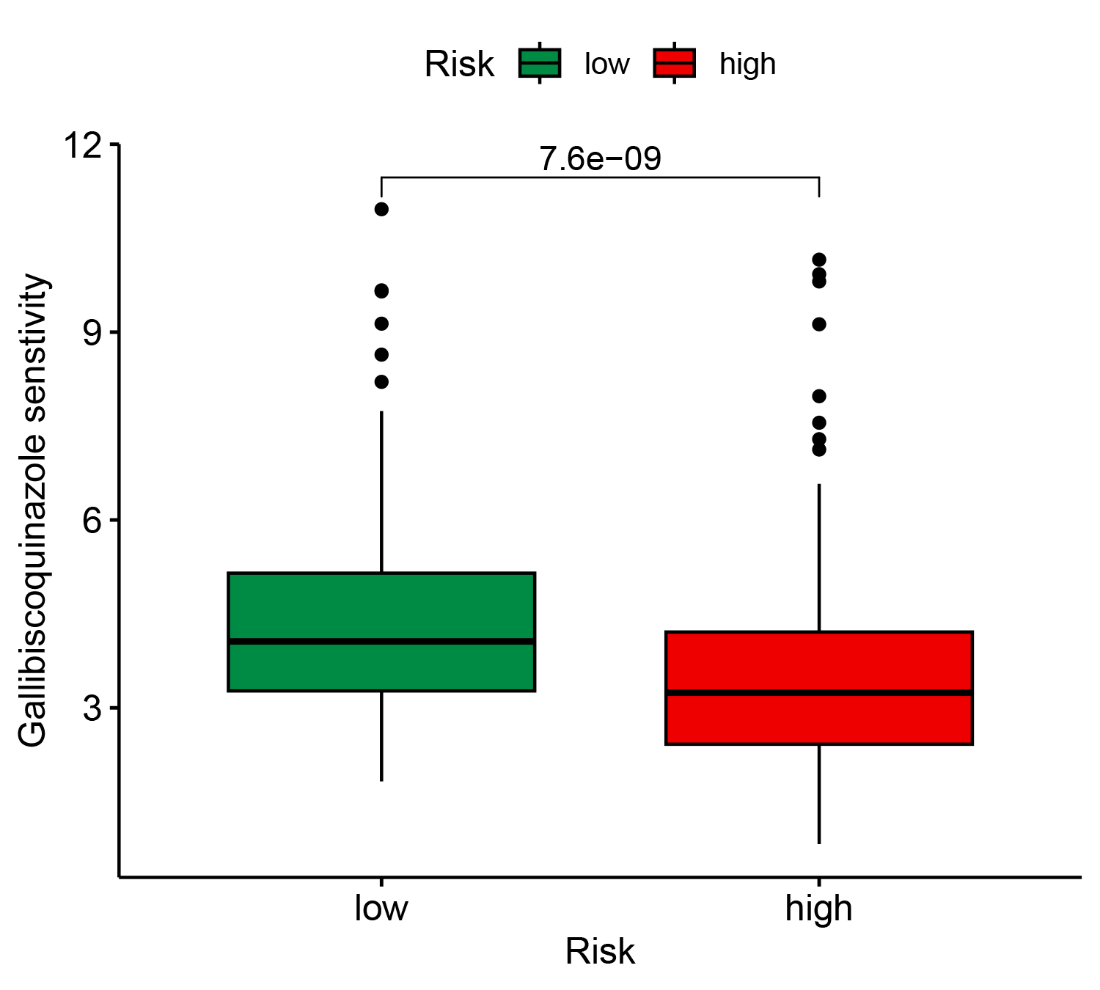

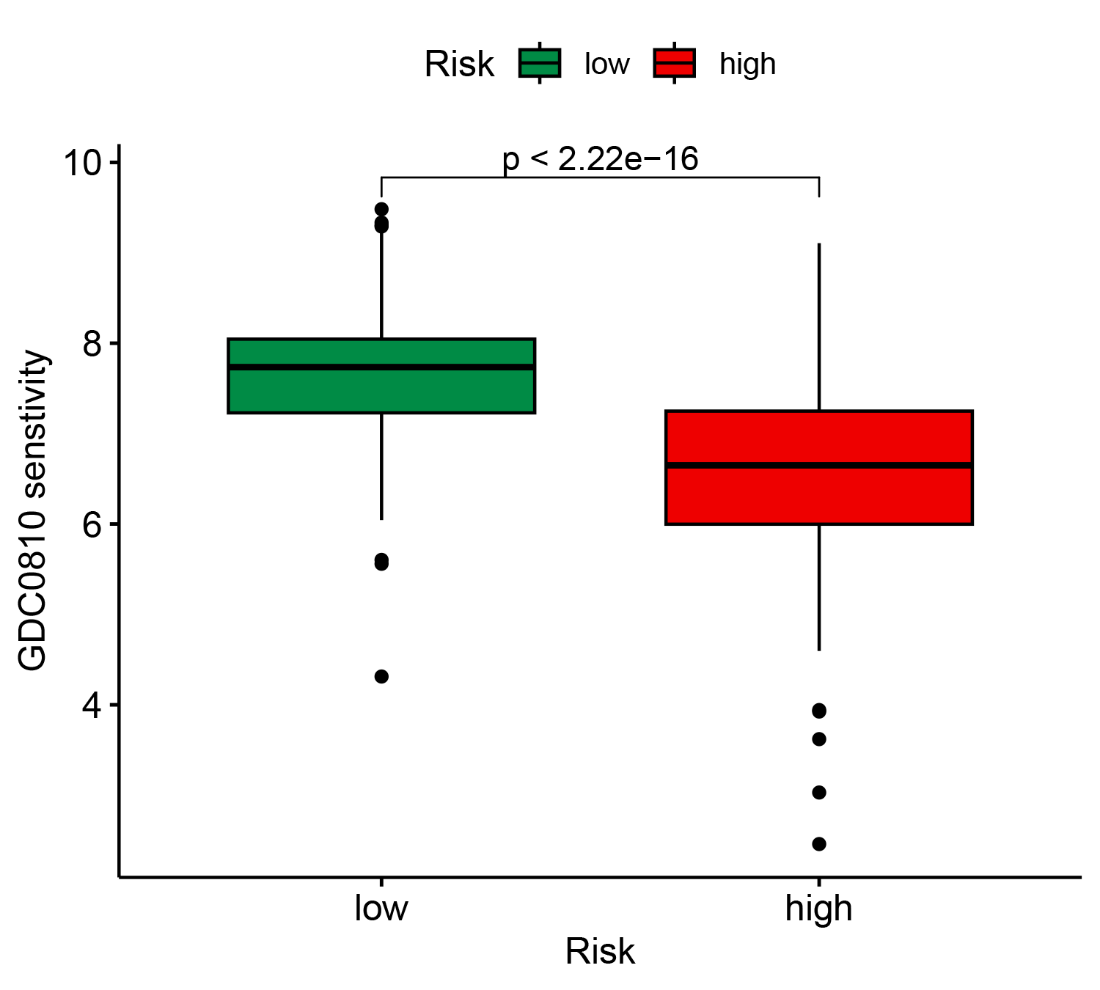

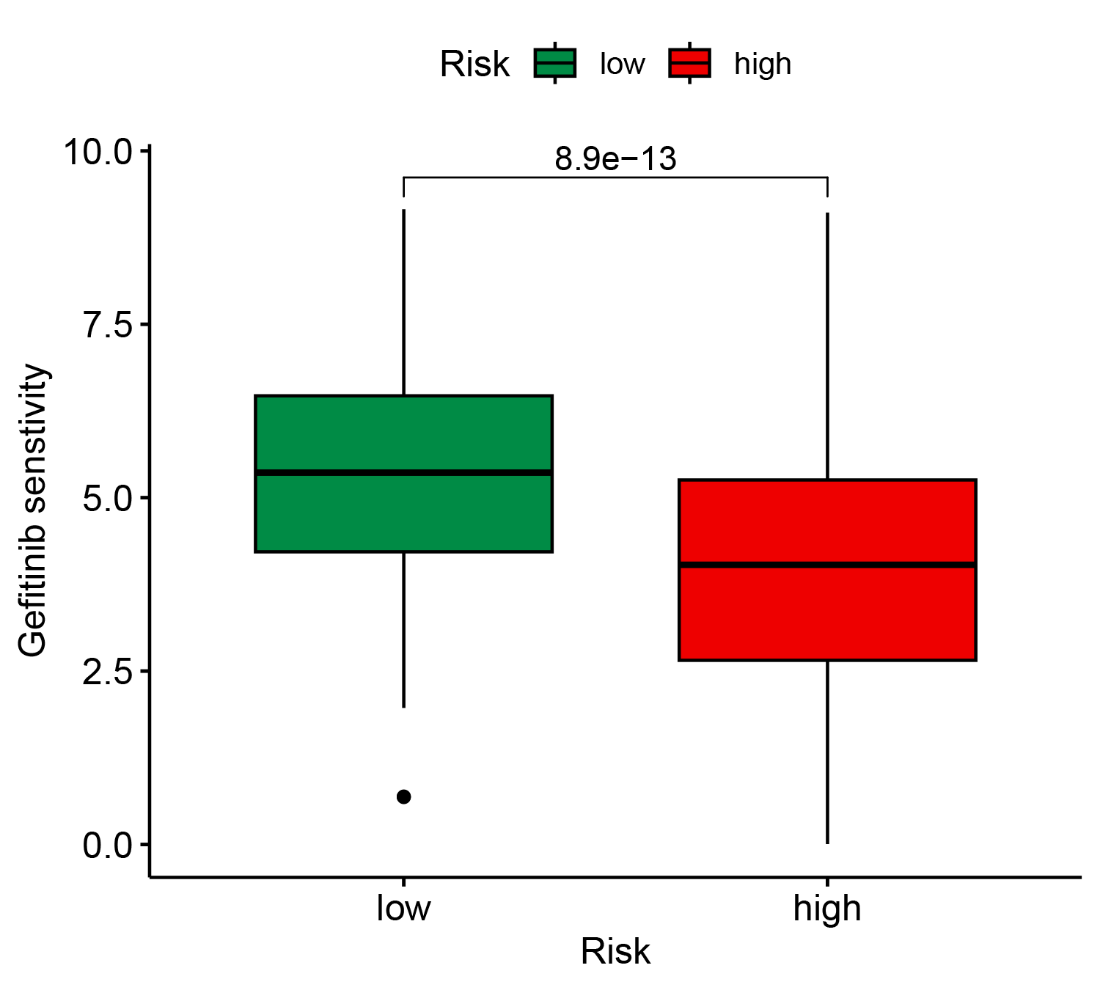

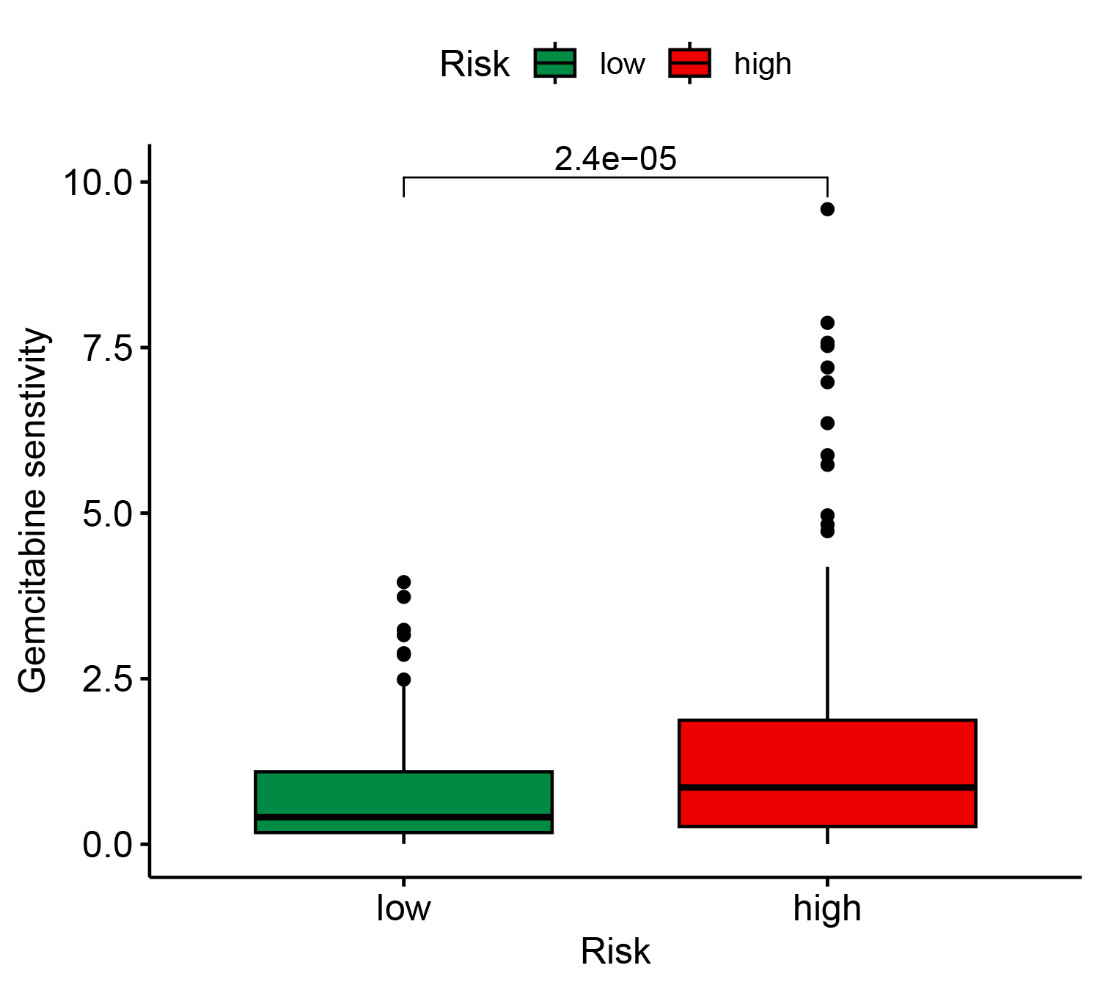

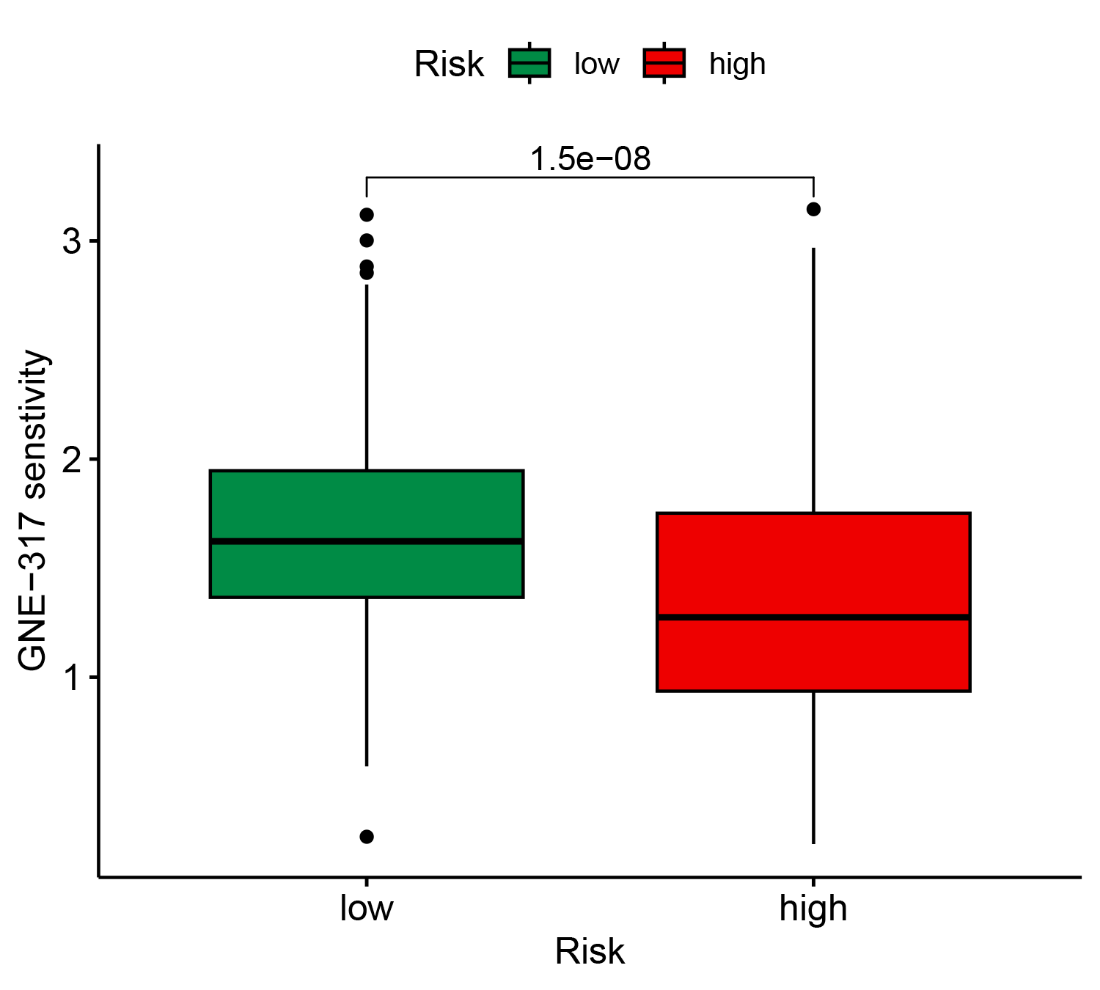

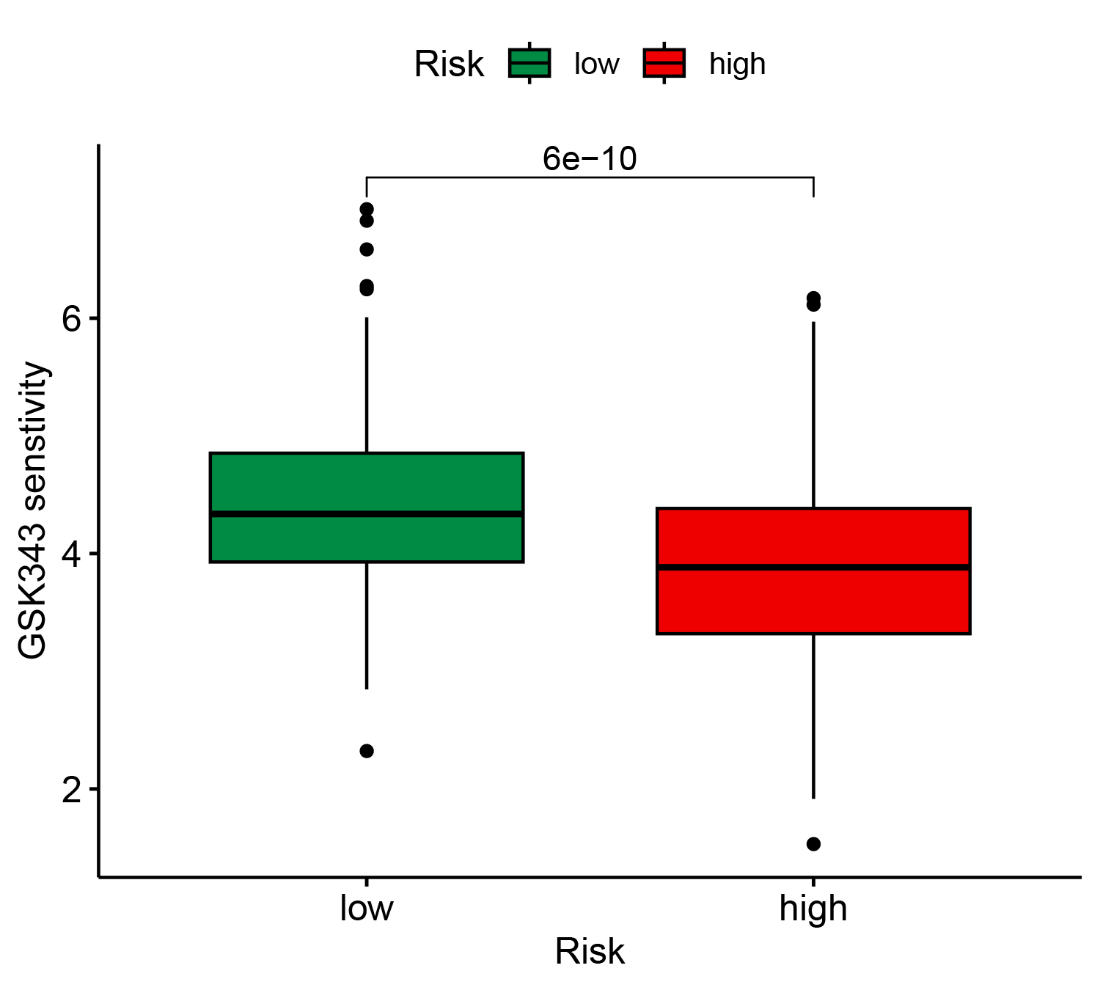

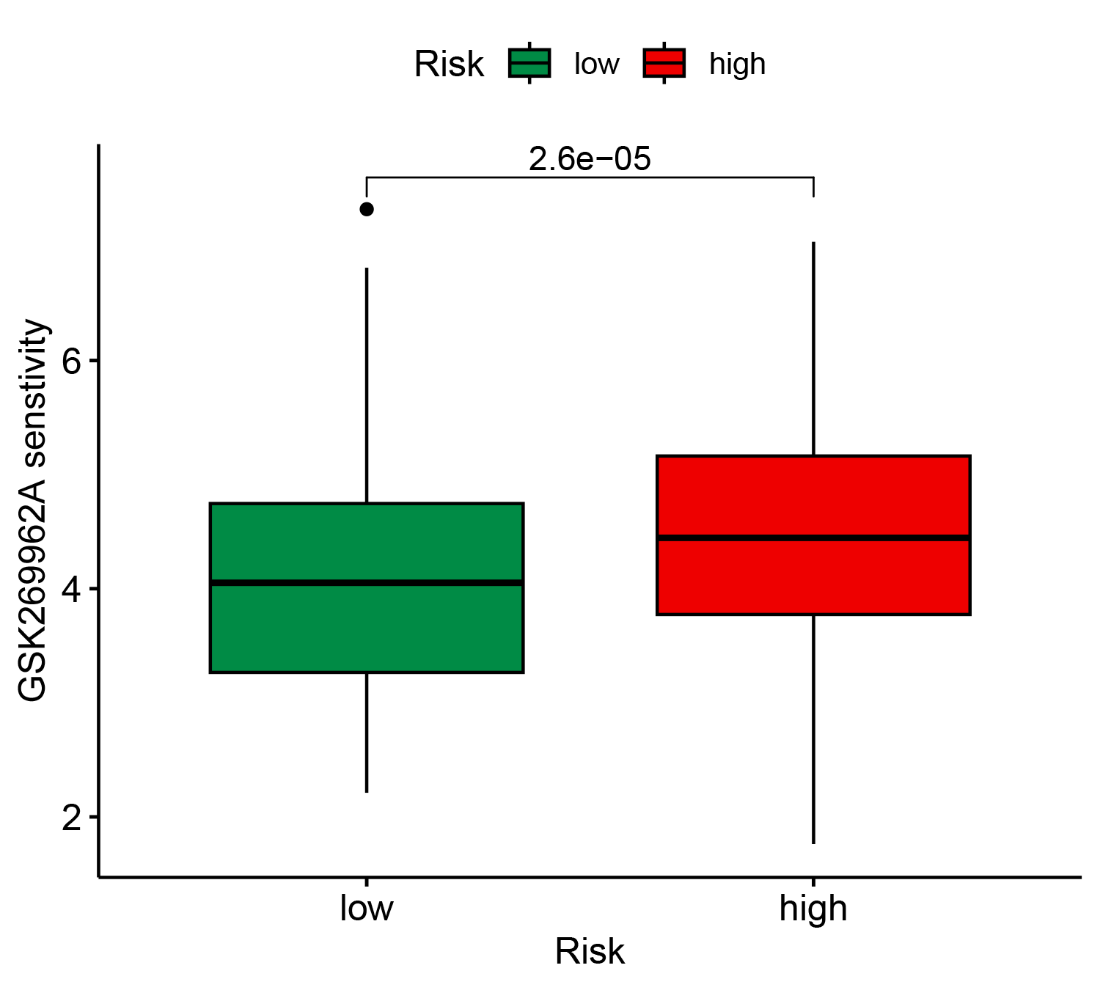

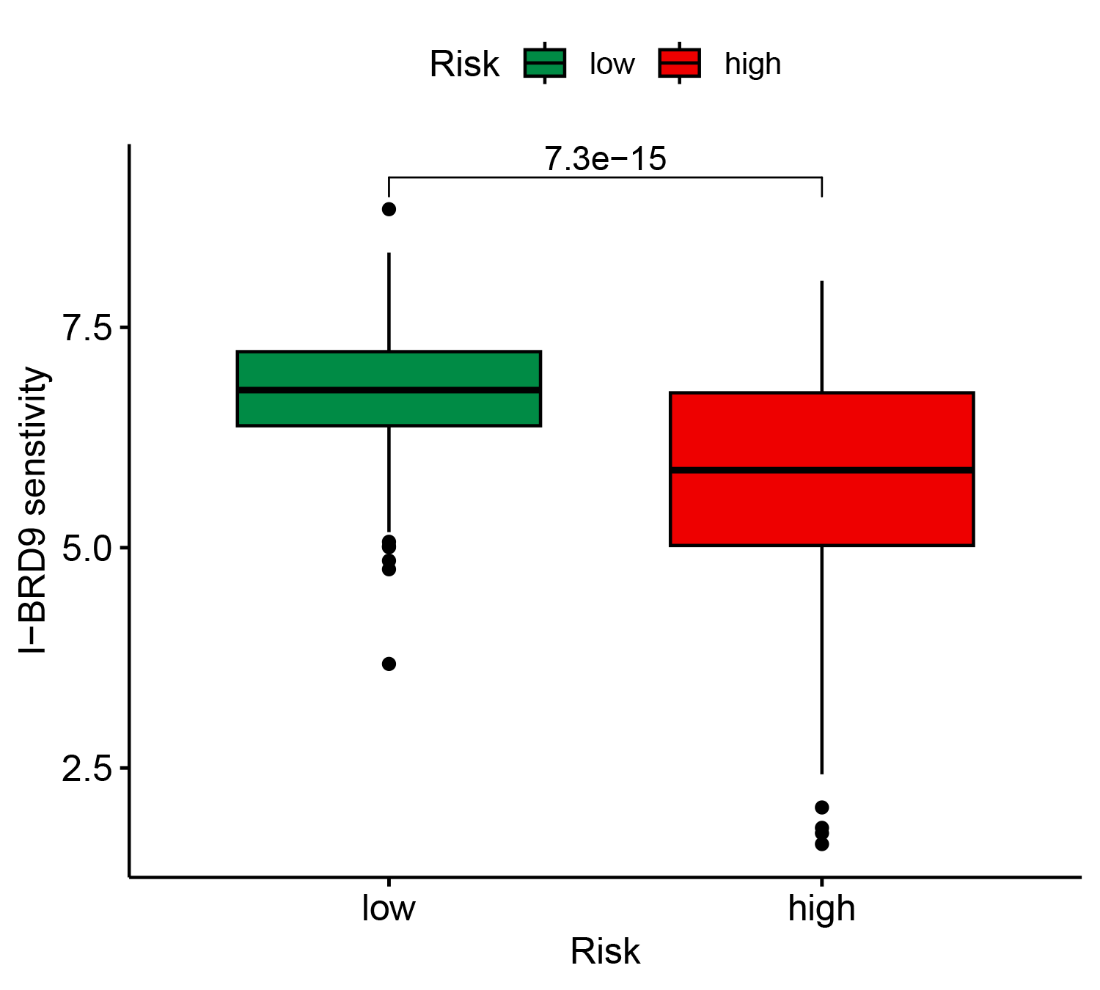

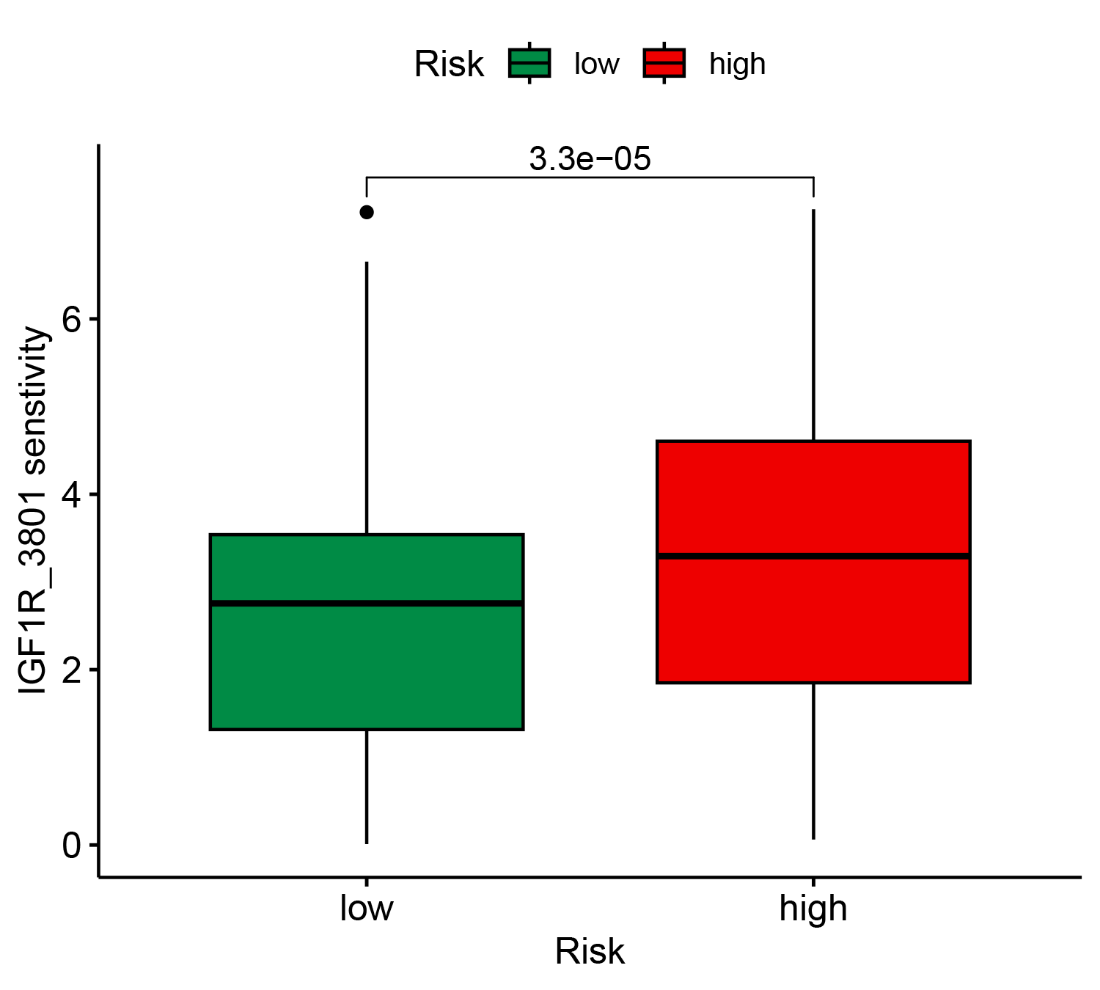

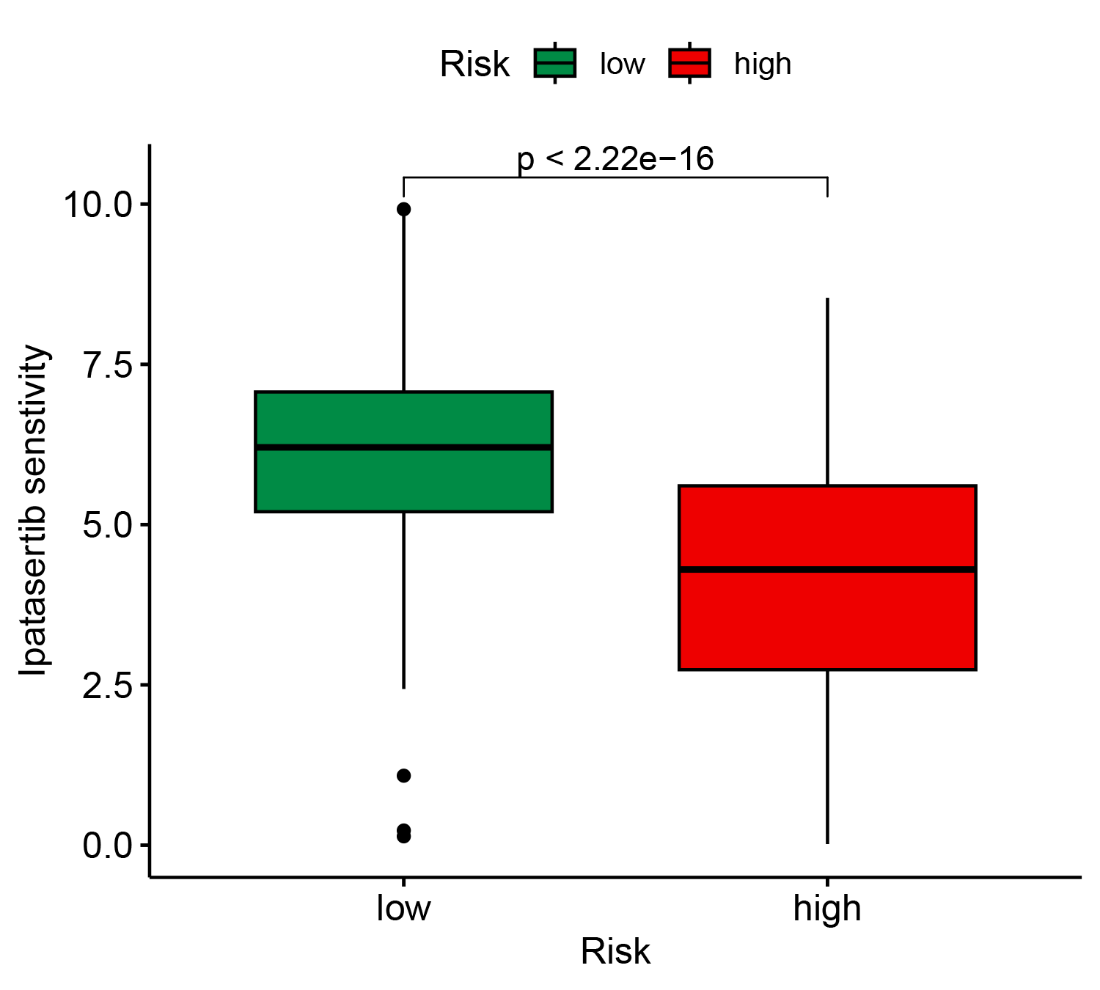

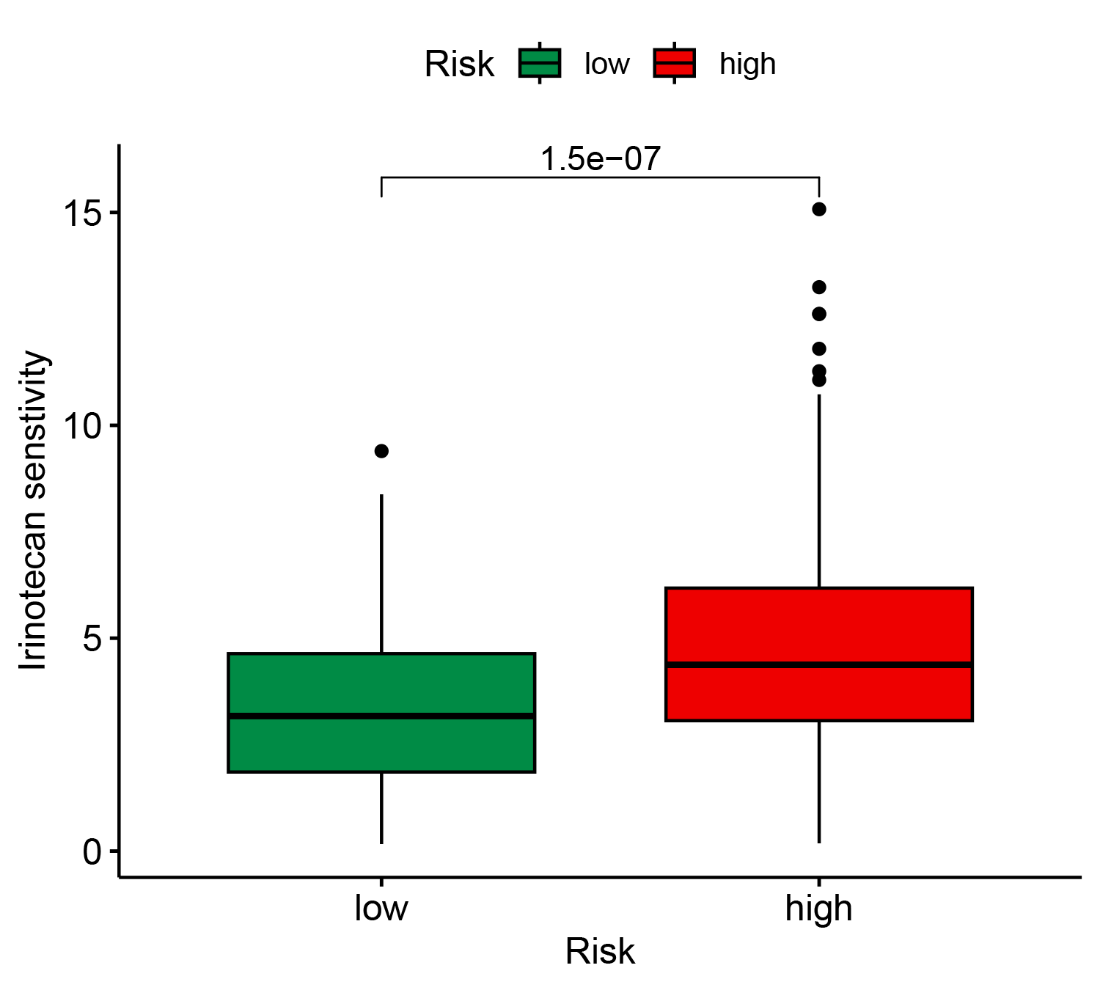

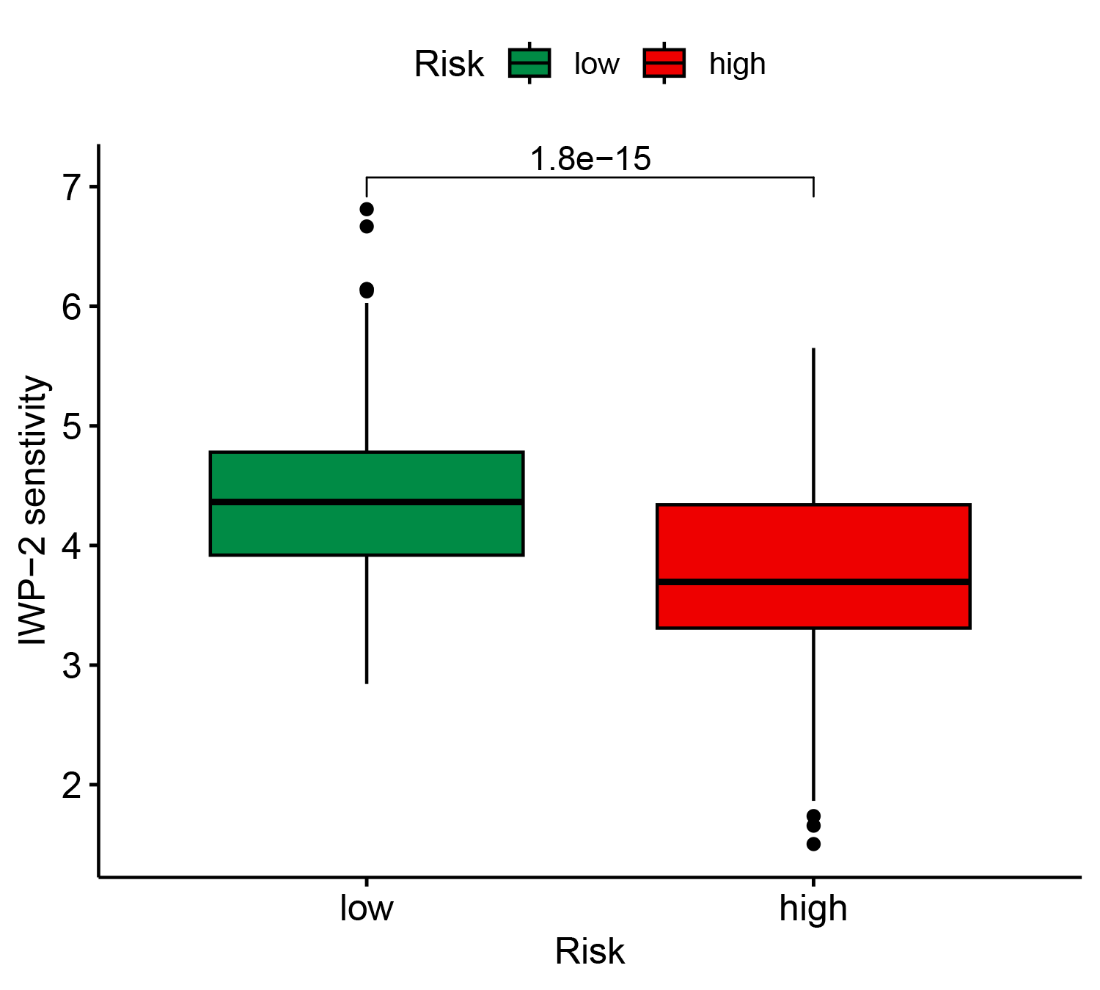

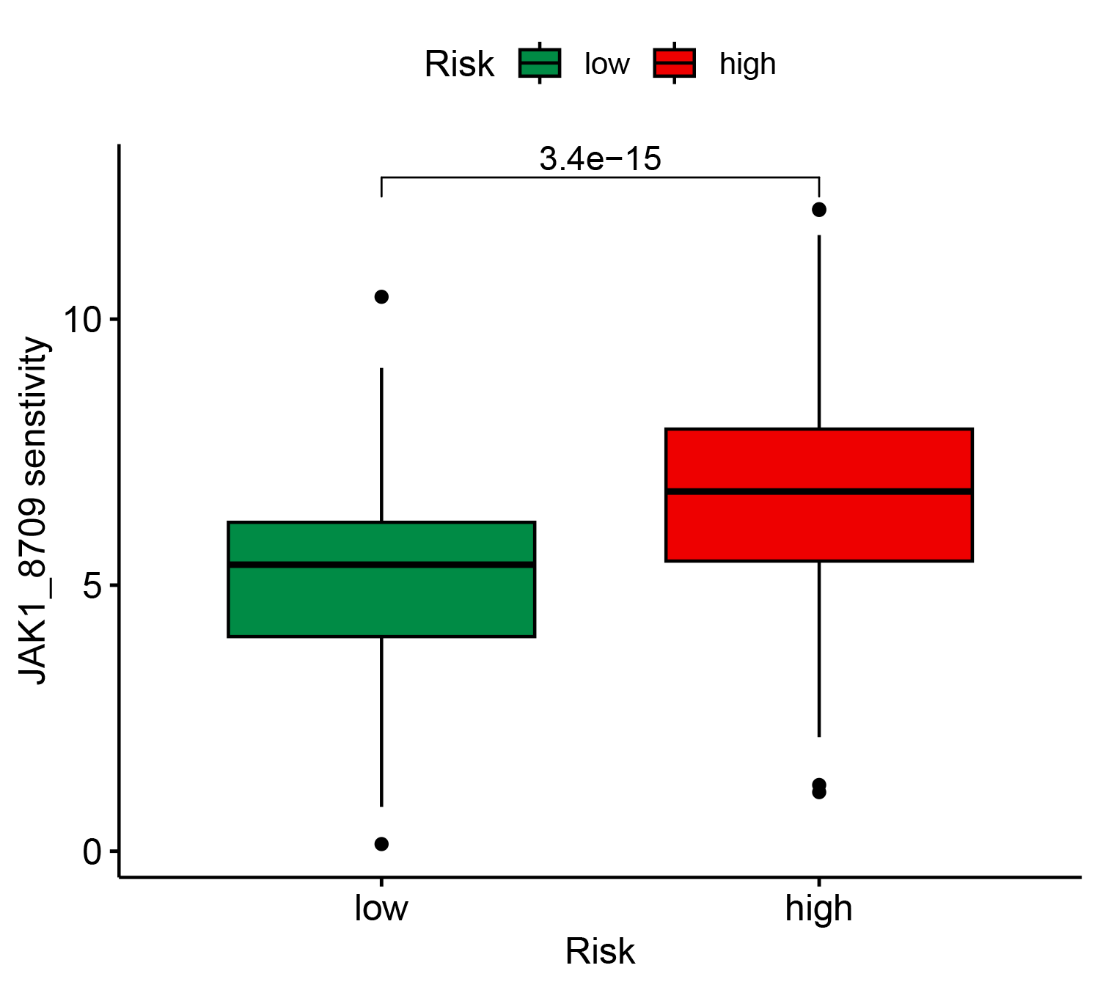

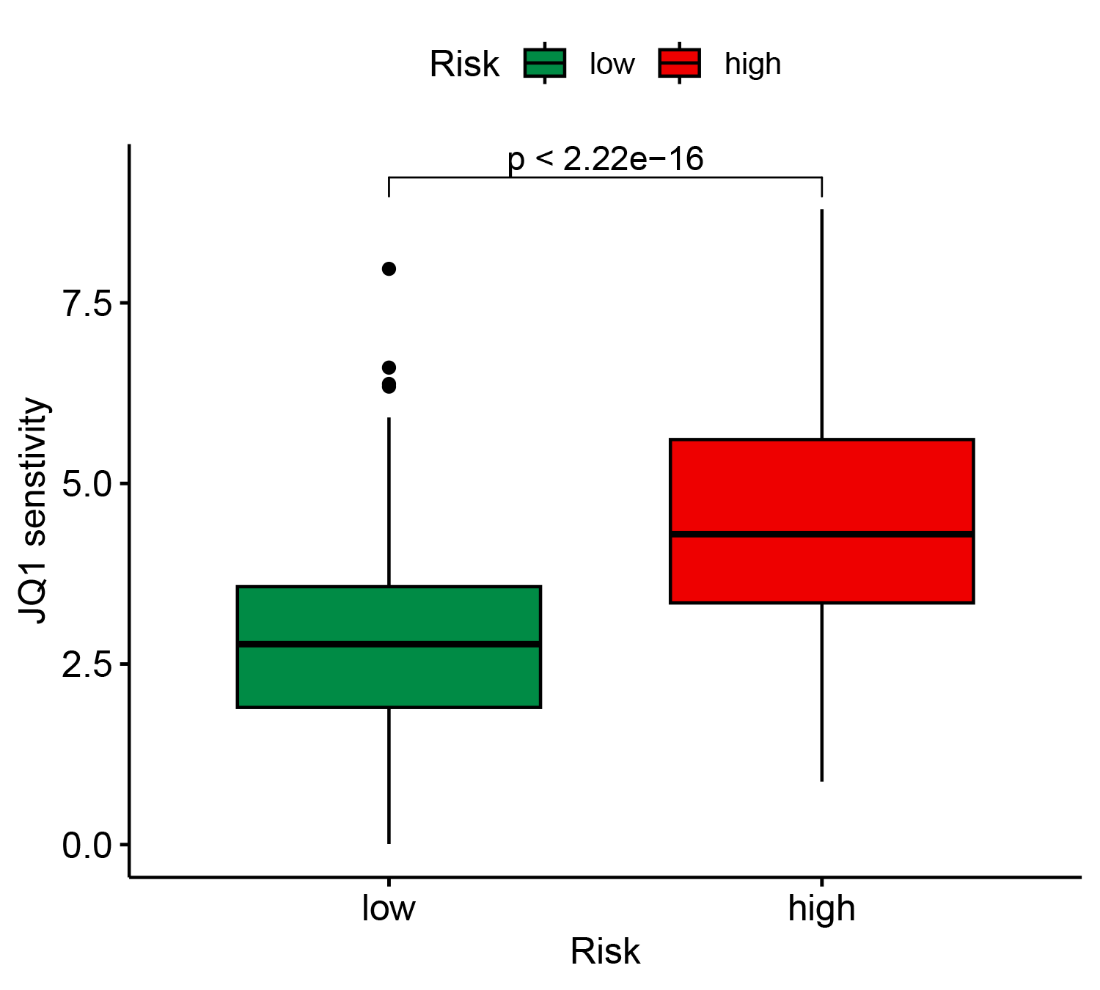

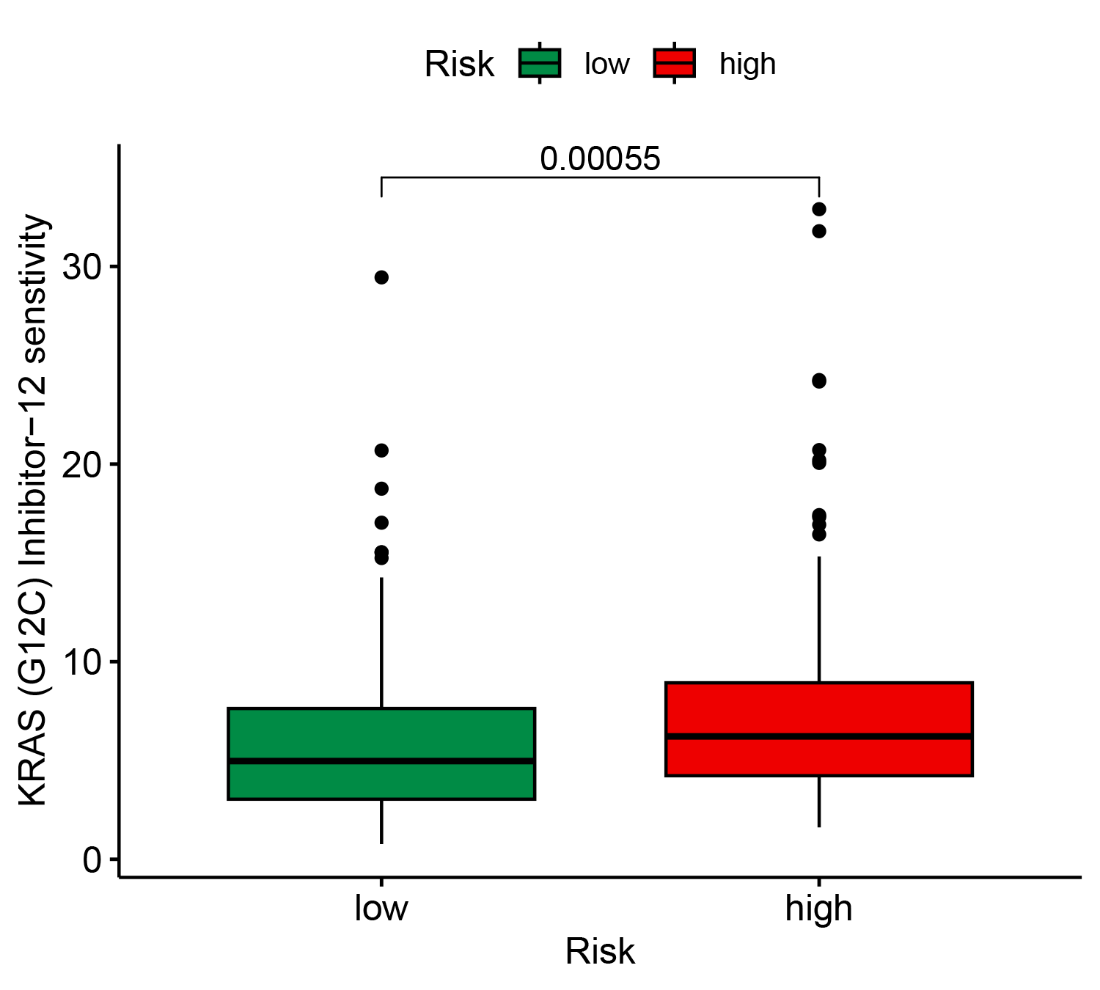

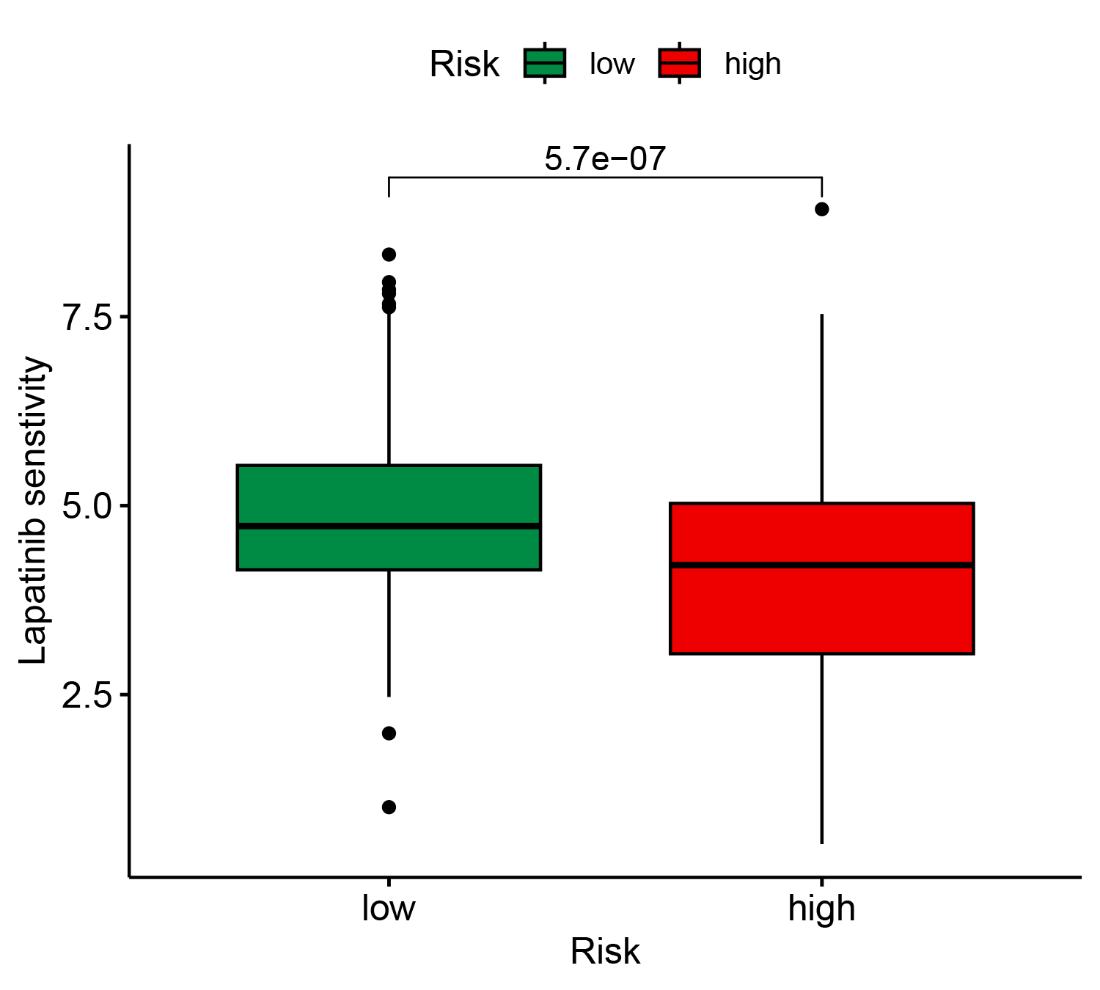

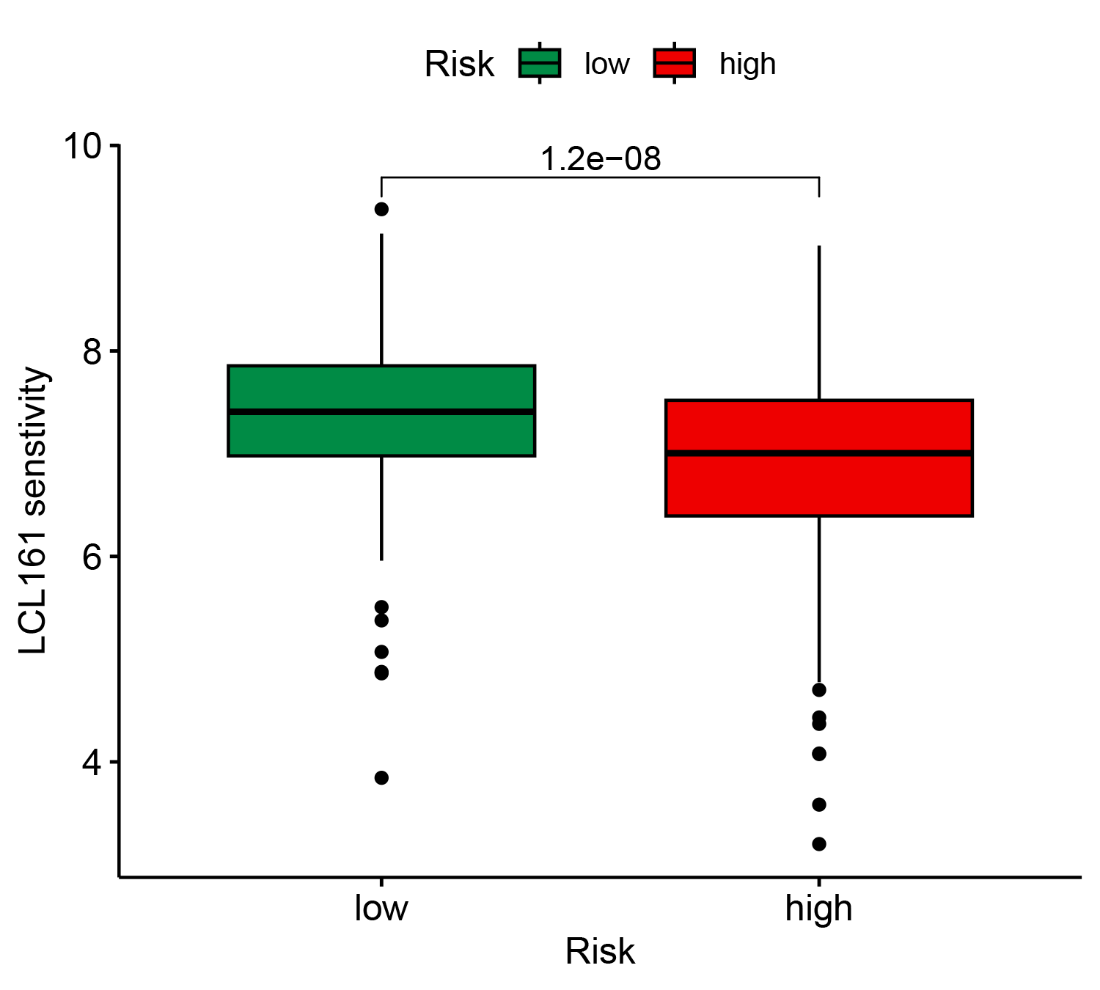

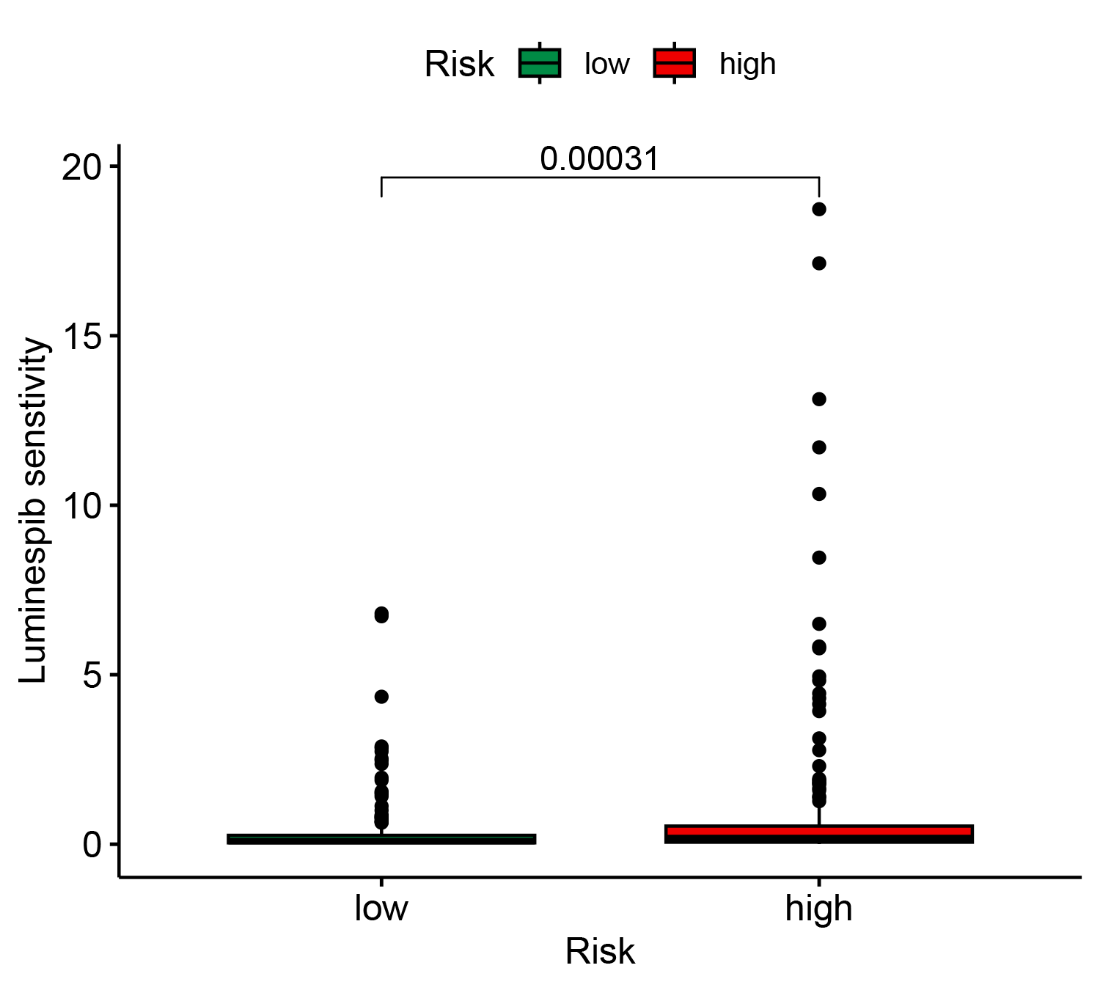

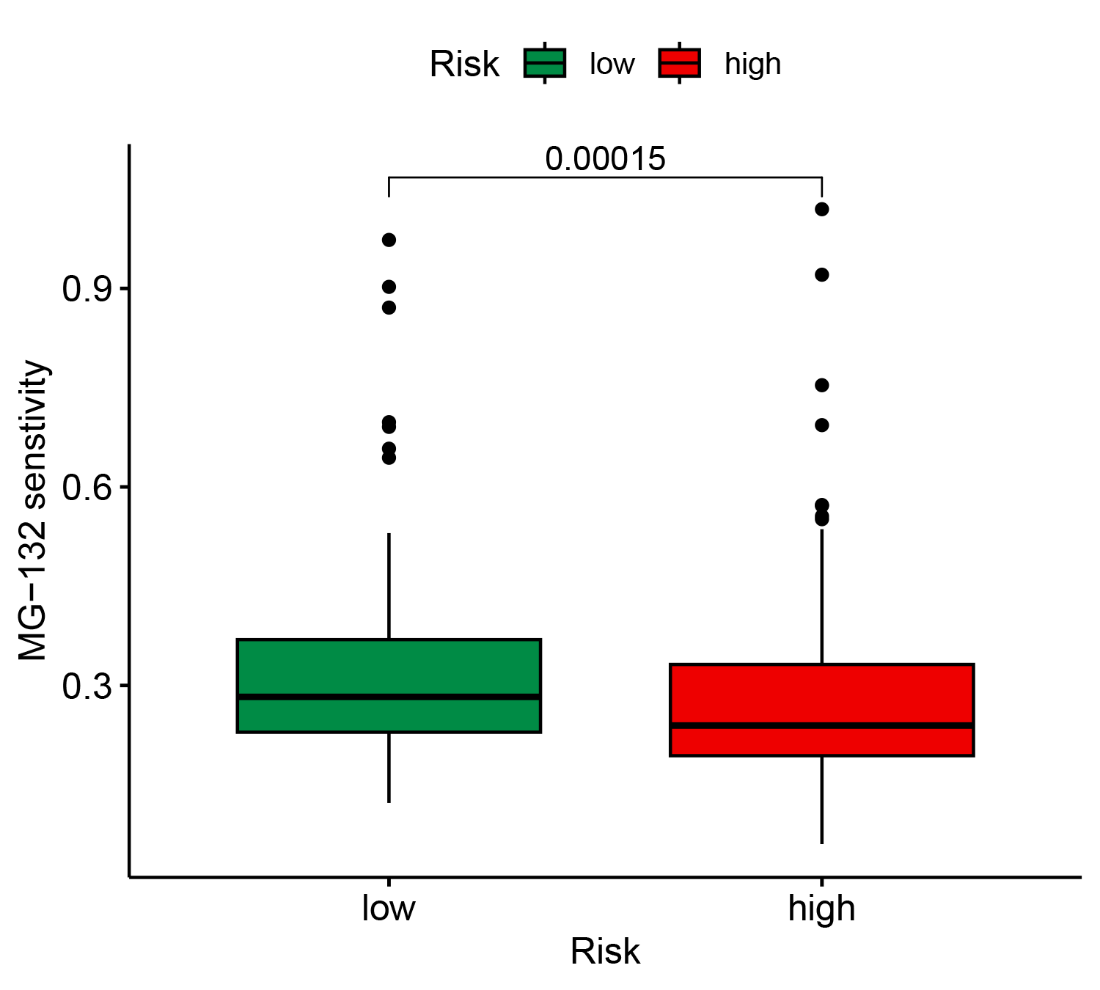

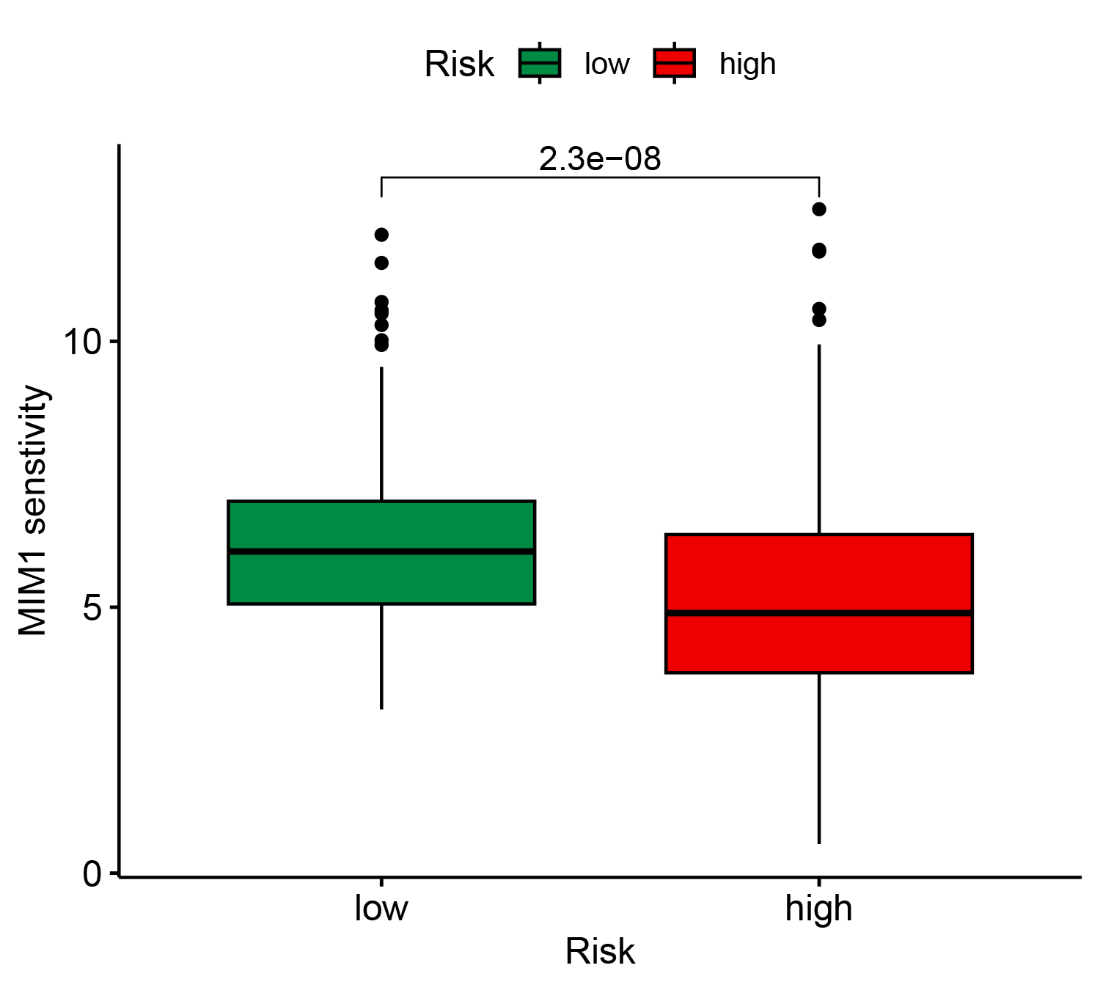

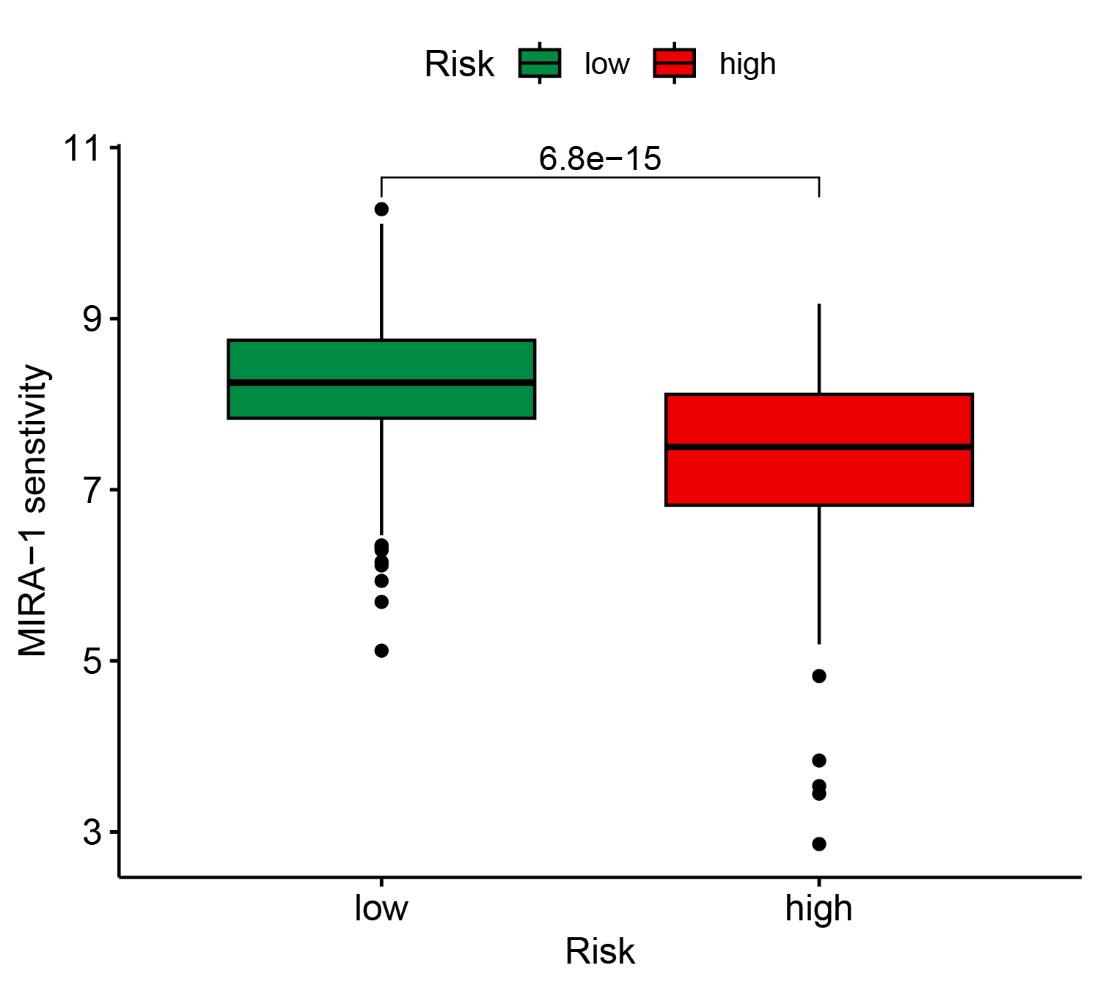

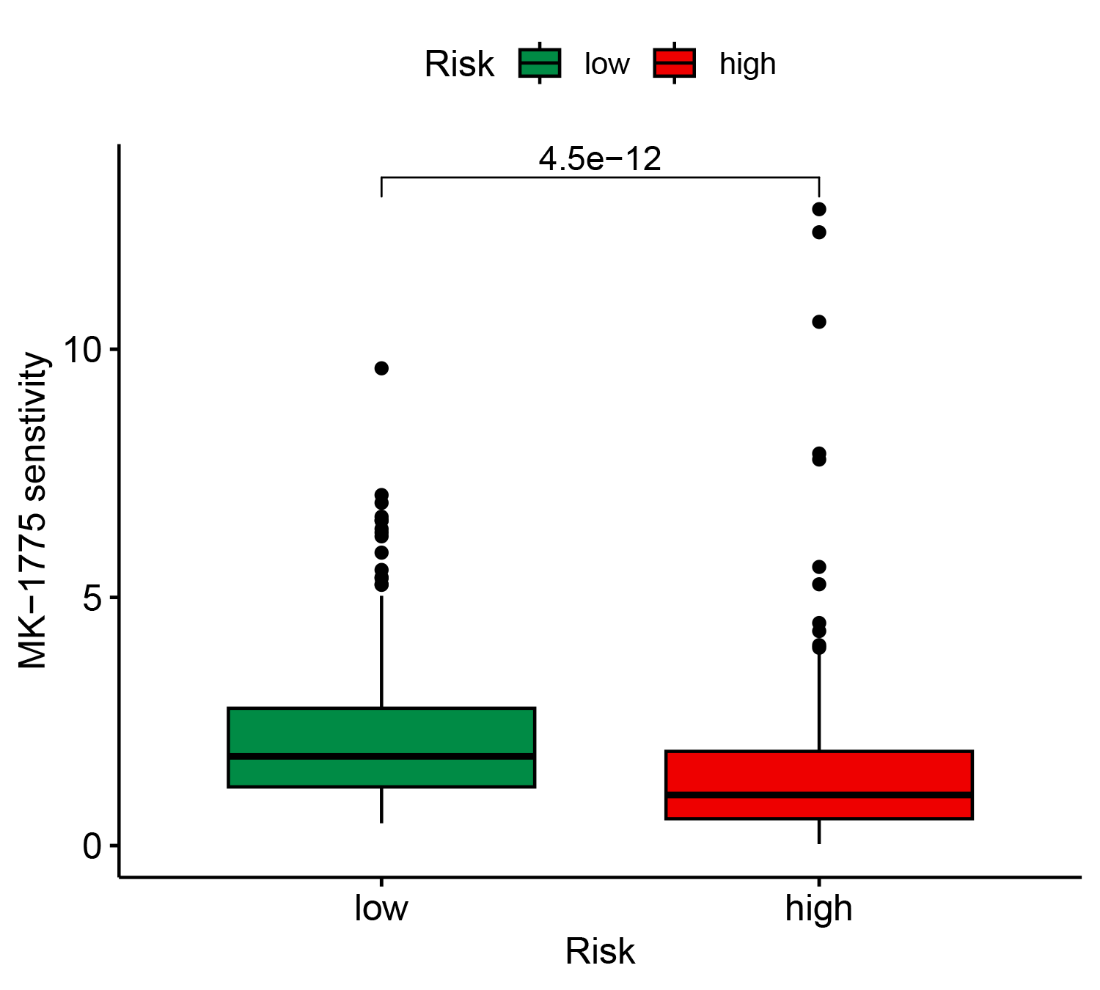

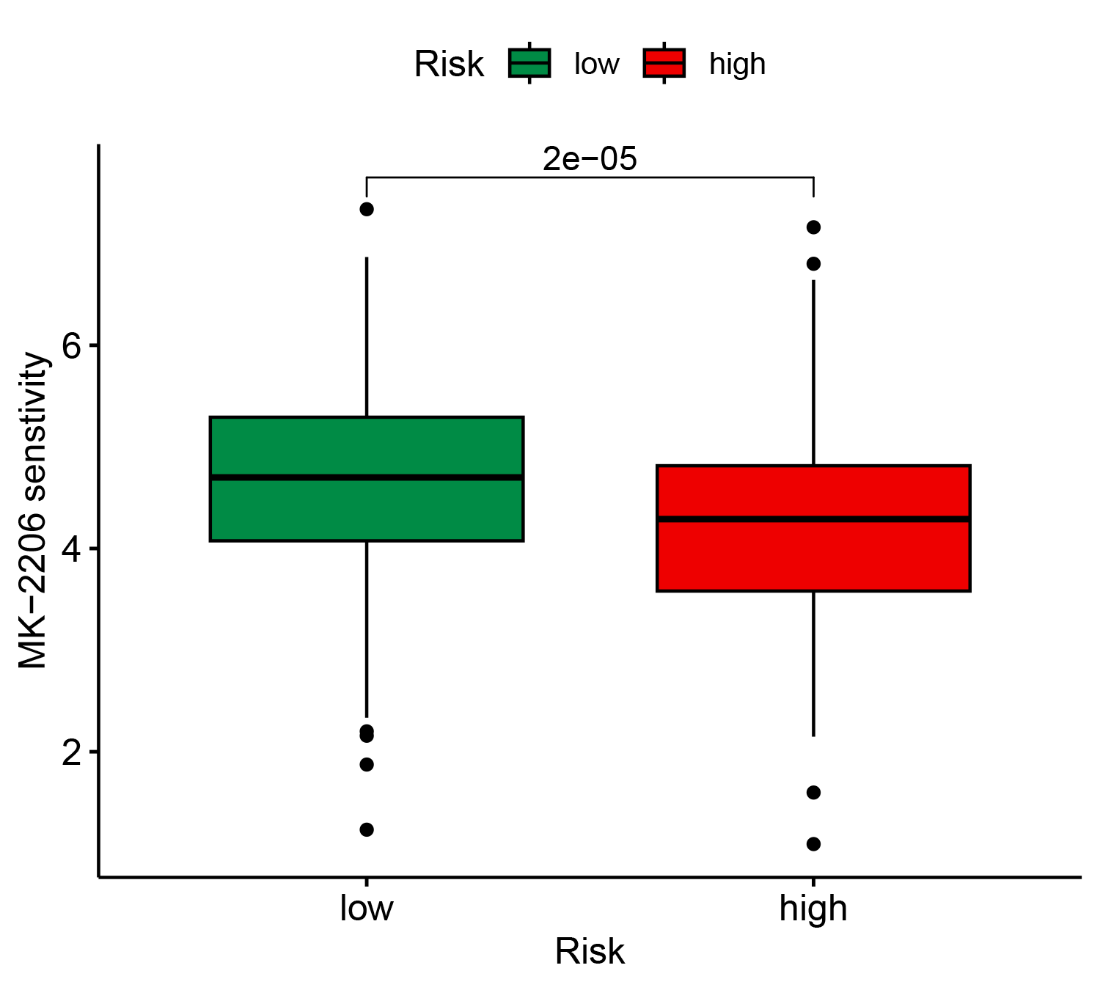

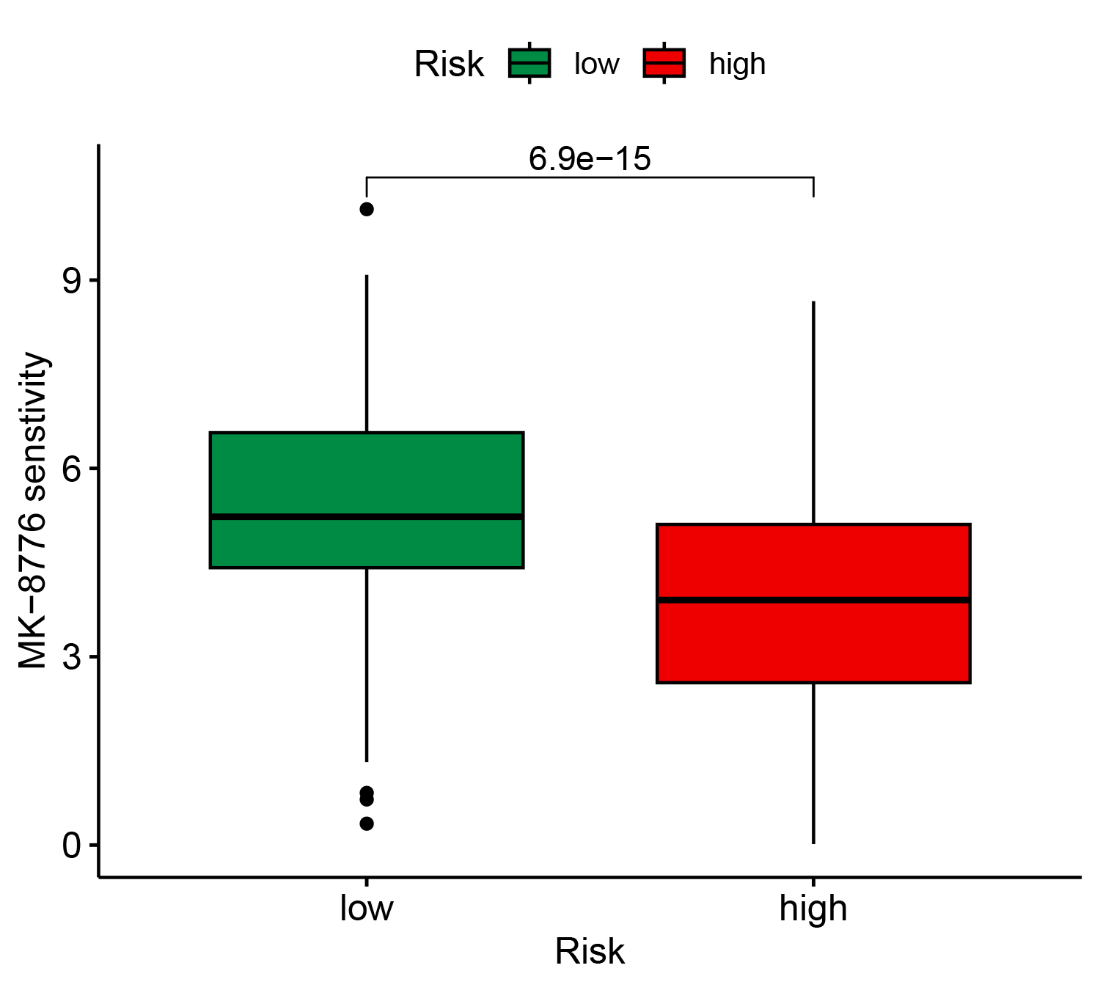

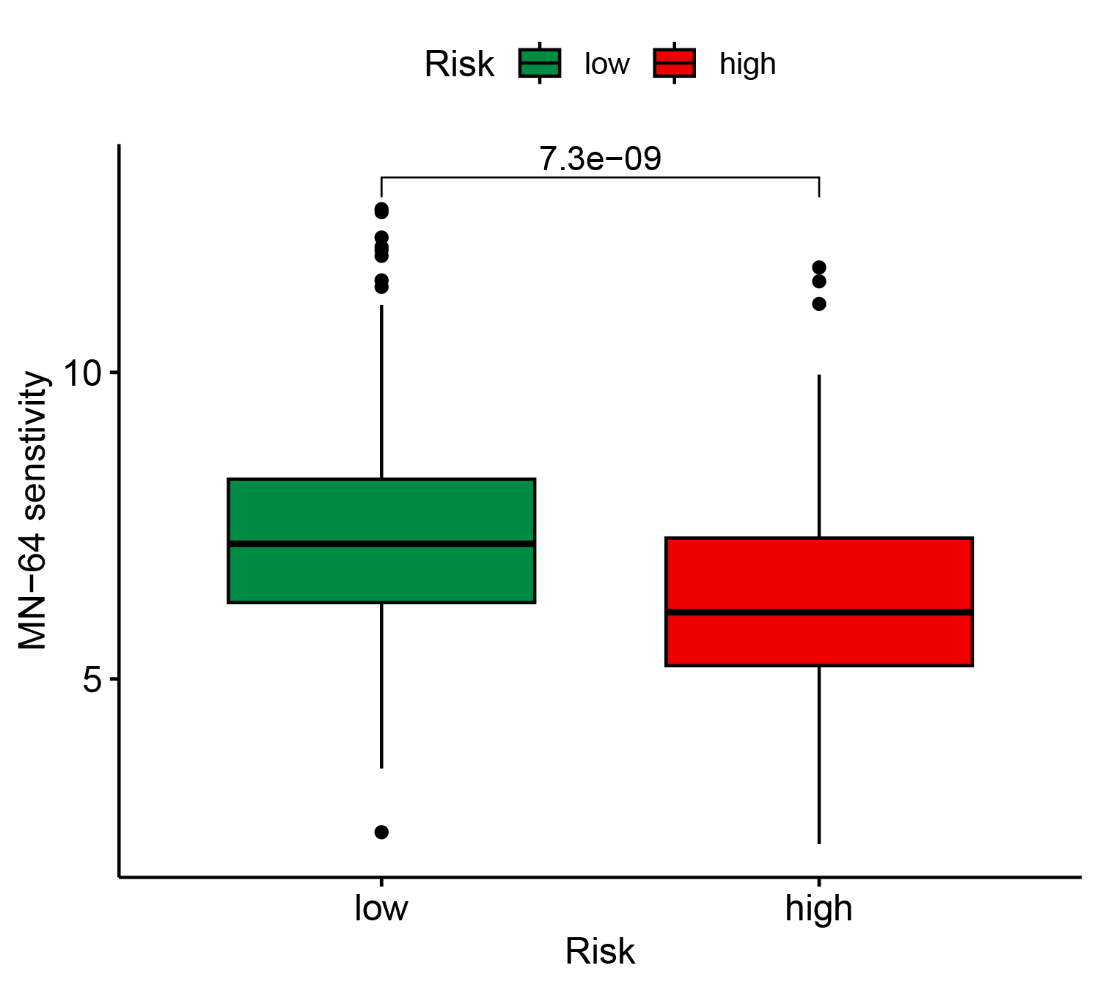

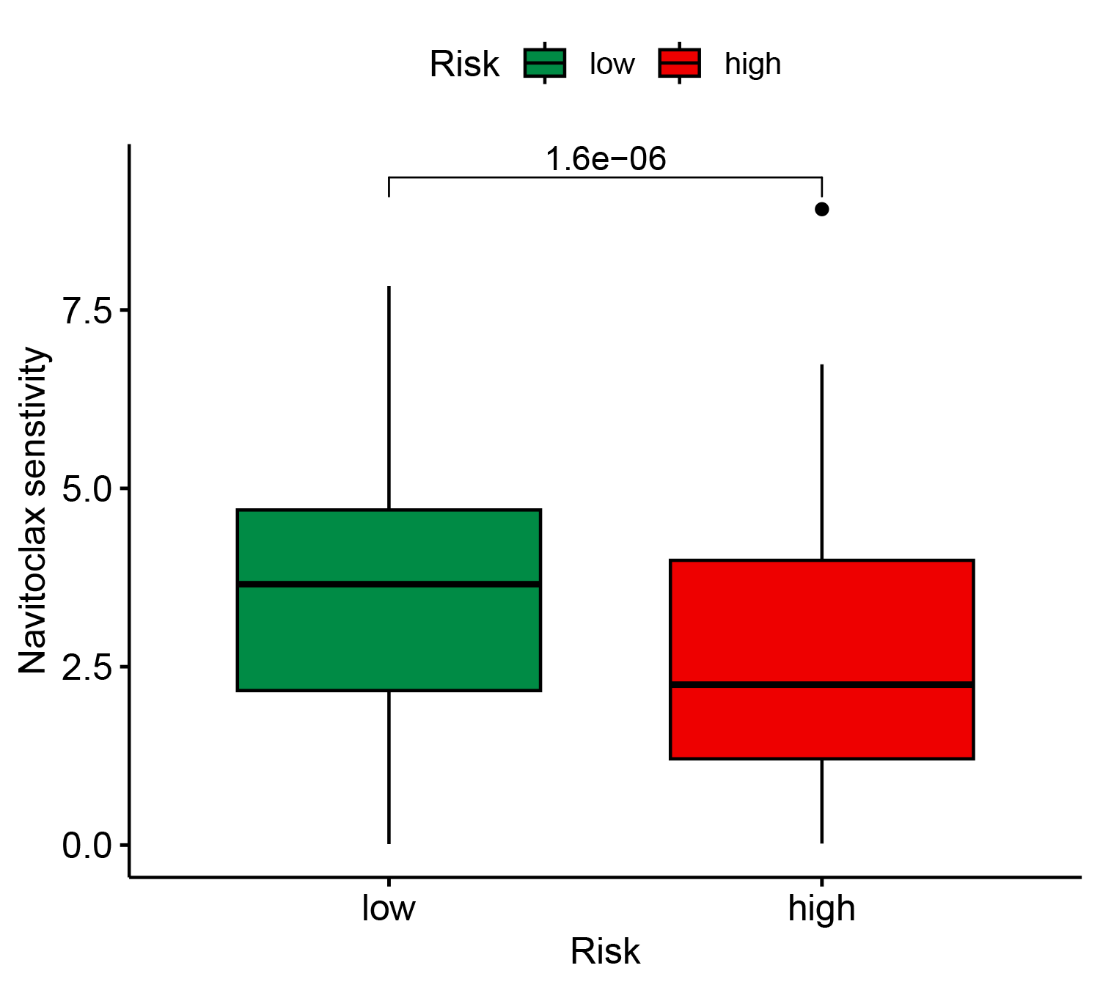

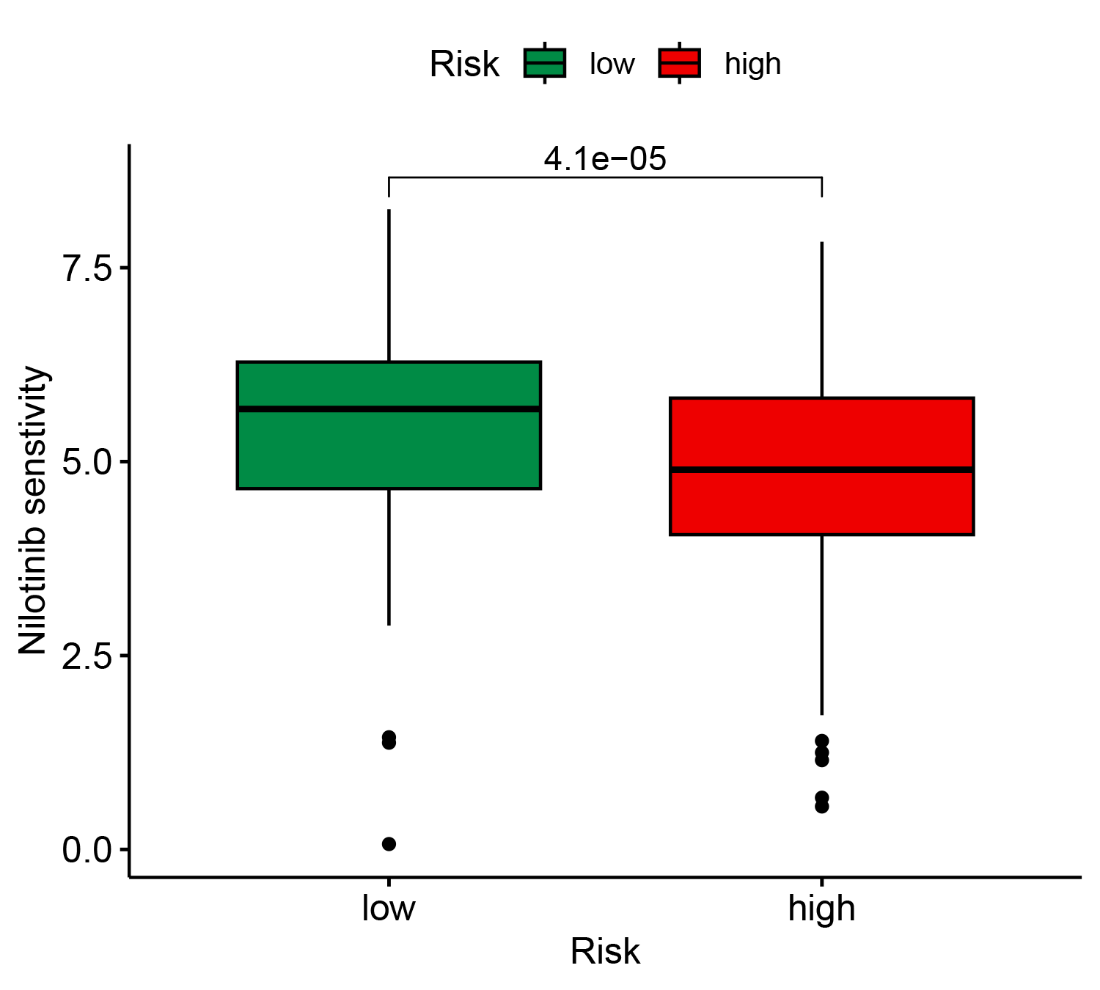

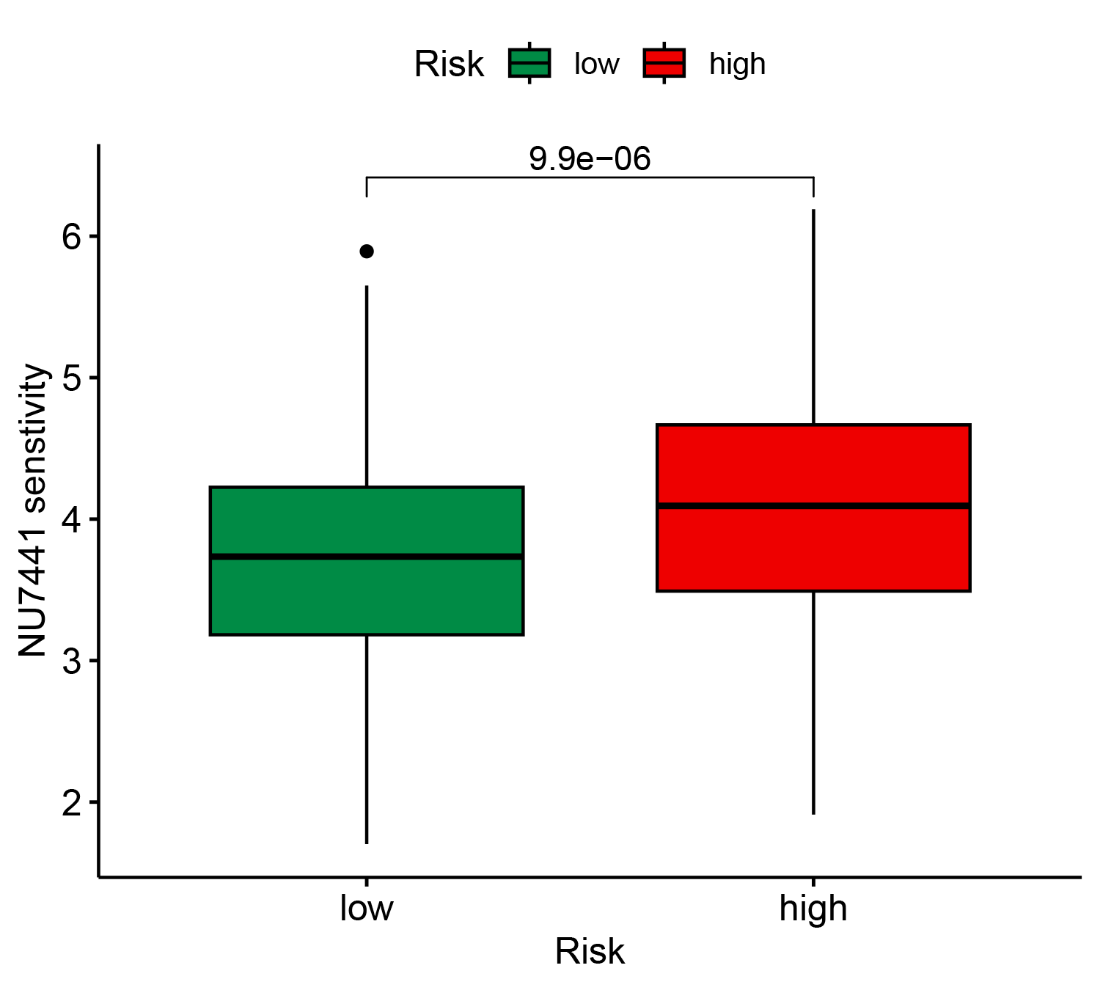

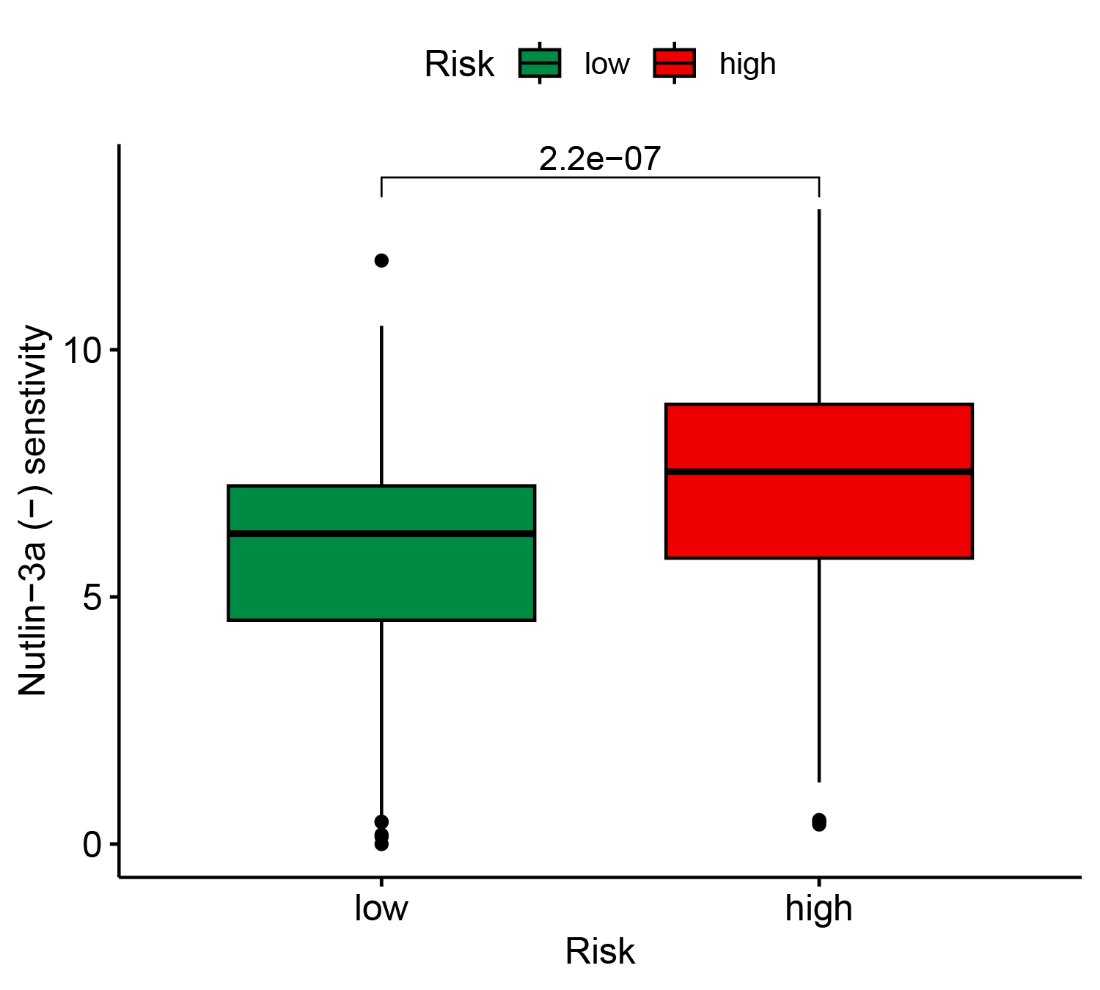

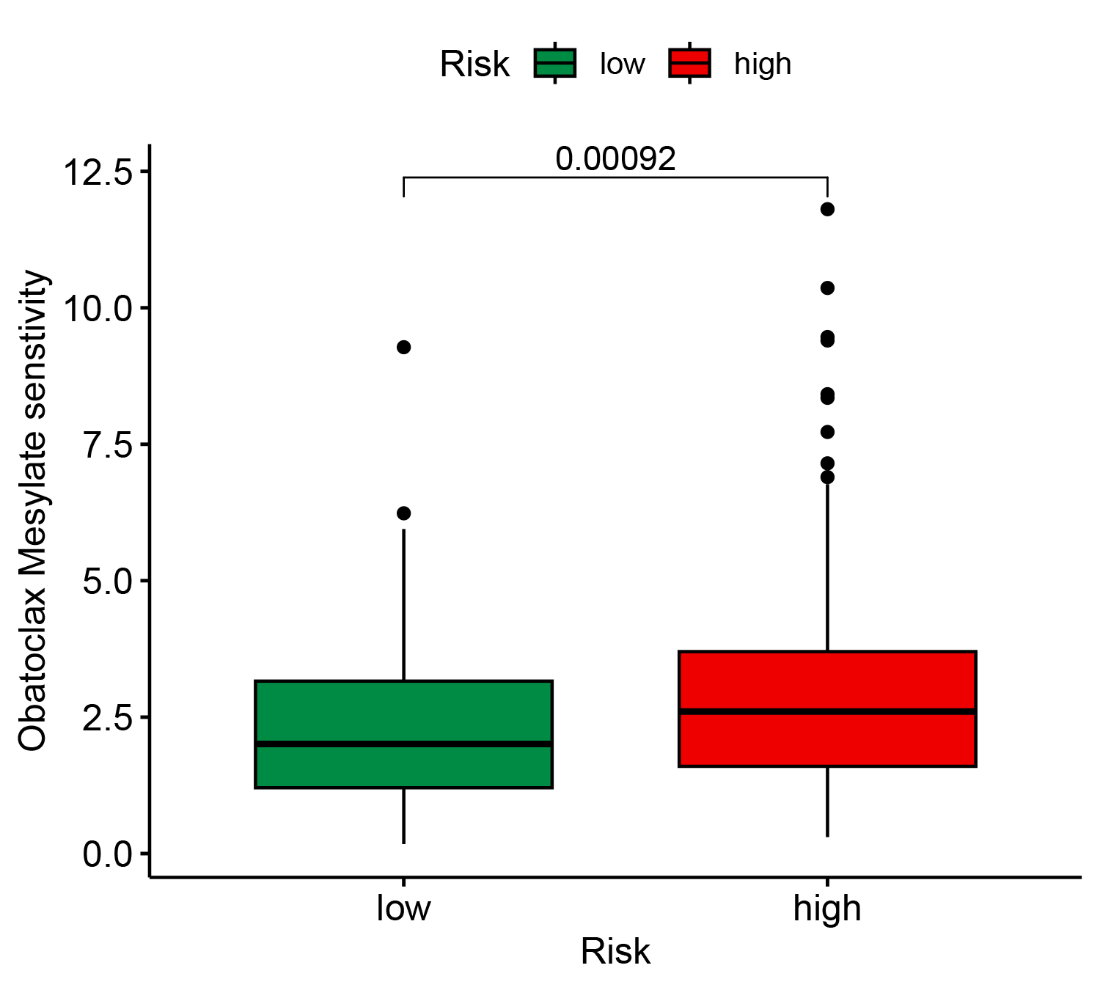

Supplement: Supplementary file 1 [file 82e03bae78ffcb36fad420ba.docx]
